# Supplementary material
Source: publisher figshare collection journal article supplement (https://brill.figshare.com/ndownloader/files/14829503)
Supplement: Supplementary file 1 [file 14829503]

## Sheet: Data Set Panas Scale
AGE	GENDER	COUNTRY	1INTERESTED_Song1	3EXCITED_Song1	5STRONG_Song1	9ENTHUSIASTIC_Song1	10PROUD_Song1	12ALERT_Song1	14INSPIRED_Song1	16DETERMINED_Song1	17ATTENTIVE_Song1	19ACTIVE_Song1	2DISTRESSED_Song1	4UPSET_Song1	6GUILTY_Song1	7SCARED_Song1	8HOSTILE_Song1	11IRRITABLE_Song1	13ASHAMED_Song1	15NERVOUS_Song1	18JITTERY_Song1	20AFRAID_Song1	1INTERESTED_Song2	3EXCITED_Song2	5STRONG_Song2	9ENTHUSIASTIC_Song2	10PROUD_Song2	12ALERT_Song2	14INSPIRED_Song2	16DETERMINED_Song2	17ATTENTIVE_Song2	19ACTIVE_Song2	2DISTRESSED_Song2	4UPSET_Song2	6GUILTY_Song2	7SCARED_Song2	8HOSTILE_Song2	11IRRITABLE_Song2	13ASHAMED_Song2	15NERVOUS_Song2	18JITTERY_Song2	20AFRAID_Song2	1INTERESTED_Song3	3EXCITED_Song3	5STRONG_Song3	9ENTHUSIASTIC_Song3	10PROUD_Song3	12ALERT_Song3	14INSPIRED_Song3
53	MALE	DENMARK	3	3	3	3	1	1	2	2	3	3	2	1	2	1	3	1	1	1	1	1	4	2	3	2	3	1	4	3	4	2	1	1	1	1	1	1	1	1	1	2	4	3	2	4	1	1	3
28	FEMALE	ITALY	3	2	4	2	4	1	4	4	2	2	1	1	1	1	1	1	1	1	1	1	1	1	1	1	1	1	1	1	2	1	1	1	2	2	1	1	2	1	1	2	3	4	3	4	3	1	3
26	FEMALE	PORTUGAL	5	2	3	4	2	1	4	4	1	3	5	1	1	1	1	1	1	1	1	1	2	2	2	1	1	1	4	2	1	1	3	2	1	1	1	1	1	1	1	1	3	4	4	5	1	1	3
24	FEMALE	BELGIUM	4	2	2	2	2	3	4	3	2	2	2	2	1	2	1	1	1	2	2	1	3	2	4	1	3	2	4	2	3	2	3	4	2	3	2	2	2	3	1	2	2	3	3	3	2	3	3
38	MALE	BELGIUM	2	1	3	2	1	1	1	1	2	1	1	1	1	1	1	1	1	1	1	1	1	1	2	1	2	1	2	1	1	2	1	1	1	1	1	1	1	1	1	1	1	2	1	1	1	1	1
30	FEMALE	GREECE	3	2	4	3	3	3	4	3	4	2	1	1	1	1	1	1	1	2	1	1	3	3	3	3	4	3	3	4	4	3	3	2	1	3	2	3	2	4	3	4	3	3	3	4	1	3	3
34	FEMALE	GERMANY	2	3	4	1	1	2	3	2	3	1	1	1	1	1	1	1	1	1	1	1	2	2	3	2	1	2	2	2	2	1	1	1	1	1	1	1	1	1	1	1	4	4	4	4	1	4	3
54	OTHER	ENGLAND	2	1	1	2	1	2	1	1	2	1	3	1	1	1	1	2	1	2	3	1	1	1	1	1	1	1	1	1	1	1	1	1	1	1	1	1	1	1	1	1	2	2	2	2	2	3	2
31	FEMALE	BOLIVIA	4	3	1	5	3	4	5	4	4	3	4	1	1	1	1	1	1	1	1	1	3	2	3	3	1	3	3	4	4	3	2	1	1	1	1	1	1	2	1	1	3	5	3	5	4	4	2
32	MALE	AUSTRALIA	2	2	2	2	1	2	2	2	2	2	1	1	1	1	1	1	1	1	1	1	3	3	3	3	2	4	4	2	3	3	1	1	1	1	1	1	1	2	1	2	1	2	1	1	1	3	1
21	FEMALE	BELGIUM	3	1	1	2	2	2	2	1	2	1	3	1	1	1	1	1	1	2	1	1	3	1	2	2	3	2	4	4	3	1	4	1	1	1	1	1	1	1	1	1	3	3	2	4	2	2	2
34	MALE	UK	4	2	1	3	3	2	3	3	4	2	1	1	1	1	1	1	1	1	1	1	3	3	1	4	1	2	2	4	3	2	2	1	1	1	1	1	1	3	3	4	5	5	3	4	4	2	4
51	MALE	DENMARK	3	2	2	4	4	4	3	3	4	2	1	1	2	1	1	1	1	1	1	1	2	3	3	2	3	3	2	4	3	3	2	2	1	2	3	2	1	2	3	2	1	1	2	1	1	1	1
24	MALE	CANADA	2	2	3	3	3	2	3	2	2	2	1	1	1	1	1	1	1	1	1	1	1	1	1	1	1	1	1	1	1	1	1	1	1	1	1	1	1	1	1	1	3	3	2	3	1	3	2
47	MALE	BELGIUM	4	1	3	4	4	1	4	1	4	3	2	1	1	1	1	1	1	1	1	1	2	1	1	1	1	1	3	1	3	1	4	1	2	1	1	1	1	1	1	1	3	4	4	5	3	2	4
28	MALE	BELGIUM	3	2	4	2	1	4	5	4	3	2	1	1	1	1	1	1	1	1	1	1	3	3	4	3	2	4	5	5	2	2	2	1	1	1	1	1	1	2	1	1	4	3	1	4	1	3	2
28	FEMALE	UK	4	3	4	2	2	1	4	3	4	2	1	1	2	2	1	1	2	2	1	2	3	3	4	3	2	2	4	4	3	3	2	1	2	2	1	1	2	2	2	2	3	2	4	4	2	1	2
35	MALE	SWITZERLAND	4	2	2	3	3	1	4	2	4	2	2	1	1	1	1	1	1	1	1	1	3	1	3	3	1	1	4	2	2	2	1	1	1	1	1	1	1	1	1	1	2	3	3	4	4	1	2
27	FEMALE	GERMANY	4	3	2	2	2	3	5	2	3	4	1	1	2	1	1	2	1	1	1	1	3	3	3	3	4	2	5	4	4	4	2	1	1	1	2	1	1	2	2	1	4	4	3	5	1	3	5
50	MALE	UK	5	3	1	4	1	4	5	2	5	2	1	1	1	1	1	1	1	1	1	1	5	3	1	4	1	4	3	2	4	2	1	2	1	1	1	1	1	1	1	1	4	2	1	2	1	3	2
26	MALE	GERMANY	3	2	1	3	2	1	4	1	3	2	1	1	2	1	1	1	2	2	2	1	2	1	1	1	3	2	1	1	2	1	3	2	1	1	1	1	1	2	1	2	5	4	2	3	4	2	2
55	MALE	SPAIN	3	2	1	2	1	3	2	1	3	2	1	1	1	1	1	1	1	1	1	1	3	1	1	1	1	3	3	1	3	2	1	1	1	1	1	1	1	1	1	1	2	3	2	3	1	3	2
40	MALE	GERMANY	5	5	4	5	5	5	4	5	5	5	4	1	1	2	2	1	1	1	1	1	3	2	3	2	3	4	4	3	4	3	2	4	4	4	3	2	3	2	3	4	3	5	3	4	2	5	4
30	FEMALE	ROMANIA	3	1	1	2	1	2	2	1	2	1	1	1	1	1	1	1	1	1	1	1	2	1	1	1	1	1	2	1	2	1	1	1	1	1	1	1	1	1	1	1	4	4	2	4	1	1	4
32	MALE	BRAZIL	3	2	1	5	1	1	5	2	2	4	1	1	1	1	1	1	1	1	1	2	1	1	1	1	1	4	1	1	2	1	1	2	2	4	2	1	1	3	2	5	1	4	2	4	2	1	1
74	MALE	IRELAND	4	3	1	1	1	4	4	1	4	3	1	1	1	1	1	1	1	1	1	1	4	3	1	1	1	3	2	1	4	1	1	1	1	1	1	1	1	1	1	1	3	3	1	2	1	3	2
29	FEMALE	BRAZIL	4	4	3	4	3	2	4	3	4	3	1	1	1	1	1	1	1	1	1	1	1	1	2	2	2	2	2	2	2	1	4	5	1	3	4	3	1	3	4	3	4	4	2	4	2	2	3
33	FEMALE	GERMANY	2	2	3	2	2	1	2	2	1	2	1	1	1	1	1	1	1	1	1	1	1	3	1	1	1	2	2	1	1	1	1	1	1	1	1	2	1	2	2	2	3	4	3	4	4	4	4
28	FEMALE	ITALY	3	2	2	3	2	1	4	3	3	2	1	2	1	1	1	1	1	1	1	1	2	1	1	1	1	1	4	1	1	1	2	3	1	1	1	1	1	2	1	2	1	2	1	1	1	3	1
24	FEMALE	FRANCE	5	2	1	4	2	2	4	3	4	3	3	2	1	1	1	1	2	2	1	1	4	1	2	1	1	2	3	3	4	1	3	2	2	1	1	1	3	2	1	2	2	3	2	5	1	1	1
32	FEMALE	GERMANY	5	2	2	1	4	1	4	3	4	3	2	1	1	1	1	1	1	1	1	1	3	4	5	2	1	4	1	3	3	1	3	1	2	4	3	3	1	4	2	4	5	5	4	5	4	1	4
33	MALE	BELGIUM	1	1	1	1	1	1	1	1	1	1	3	1	1	1	1	1	1	1	1	1	1	1	1	1	1	1	1	1	1	1	3	1	1	1	1	1	1	1	1	1	1	2	1	3	1	1	1
31	FEMALE	GERMANY	3	4	5	1	3	1	4	5	5	1	1	1	2	1	1	1	2	1	1	1	2	3	2	1	1	2	2	3	3	2	3	1	1	1	2	3	1	3	2	2	5	4	5	5	5	3	5
50	FEMALE	UK	2	1	3	1	2	2	3	2	3	2	1	2	1	1	1	1	1	1	2	2	1	1	1	1	1	2	1	1	2	1	4	4	1	3	1	2	1	4	3	3	3	4	3	4	2	4	3
33	MALE	BRAZIL	4	3	4	3	3	2	5	3	4	4	5	4	1	1	1	1	1	1	1	1	4	3	4	4	4	1	4	3	4	2	5	2	1	1	1	1	1	2	1	1	2	4	3	4	3	3	4
31	MALE	BELGIUM	3	2	1	2	1	2	3	2	3	2	1	1	1	1	1	1	1	1	1	1	3	3	2	3	2	3	3	3	3	2	1	1	1	1	1	1	1	1	1	1	2	2	2	2	2	2	1
36	MALE	NETHERLANDS	2	1	2	2	2	1	3	1	1	1	1	1	1	1	1	1	1	1	1	1	2	2	2	2	2	1	3	2	1	1	1	1	1	1	1	1	1	1	1	1	2	3	2	3	1	2	2
41	MALE	CANADA	3	2	2	1	1	1	2	1	2	2	1	1	2	1	1	1	1	1	1	1	3	1	2	1	2	1	3	2	3	2	2	2	2	2	1	1	2	1	1	2	3	3	3	3	2	3	2
21	FEMALE	BELGIUM	2	1	2	3	2	1	4	1	2	1	4	1	1	1	1	1	1	2	1	1	2	1	2	1	2	1	2	1	3	1	4	1	1	1	1	1	1	1	2	1	2	4	4	5	3	2	3
23	MALE	LUXEMBOURG	2	2	2	1	3	1	2	3	2	2	2	2	3	1	1	1	1	1	1	1	2	1	2	1	1	1	1	2	1	2	1	1	1	1	1	1	1	1	1	1	2	3	3	3	2	1	3
22	MALE	DENMARK	3	4	4	4	3	1	4	3	4	4	1	2	1	1	3	1	1	2	3	1	3	4	4	4	5	2	4	4	2	5	3	3	1	2	2	1	1	2	1	1	4	4	3	3	3	2	4
21	FEMALE	BELGIUM	3	2	2	4	3	4	4	3	3	2	1	1	1	1	1	1	1	1	1	1	3	3	4	3	3	4	5	4	4	3	1	1	1	2	1	1	1	1	2	1	3	5	4	5	5	4	4
25	FEMALE	THE NETHERLANDS	4	3	1	3	3	4	2	2	4	3	1	1	1	2	1	1	1	3	4	1	5	2	3	4	4	3	5	1	3	2	1	1	1	1	1	1	1	1	1	1	5	4	4	5	4	4	4
23	FEMALE	BELGIUM	5	1	5	2	2	1	5	1	4	2	2	2	5	1	2	1	1	1	3	1	5	3	5	5	5	4	5	4	3	5	3	1	1	1	1	1	1	1	1	1	5	5	5	5	3	4	5
27	MALE	BELGIUM	3	1	2	1	1	3	2	1	2	1	2	2	2	1	1	1	1	1	1	1	2	1	1	1	1	1	1	1	1	1	2	2	1	1	1	1	1	1	1	1	2	2	1	2	1	2	2
23	MALE	BELGIUM	4	3	3	4	3	1	4	3	5	5	1	2	1	1	1	1	1	1	1	1	3	1	1	1	2	4	3	3	2	2	5	5	5	4	2	1	4	4	1	5	2	5	4	5	4	1	2
29	MALE	BELGIUM	2	1	1	2	2	2	2	1	3	2	3	1	2	1	2	2	2	1	2	1	3	2	3	4	3	3	3	3	4	4	1	1	1	2	1	1	1	1	3	1	3	3	2	3	1	2	2
27	FEMALE	ITALY	4	3	3	2	3	1	3	2	2	3	1	1	1	1	1	1	1	1	1	1	4	1	1	1	2	4	3	2	5	2	4	3	2	4	1	1	1	1	1	4	5	5	4	4	1	4	3
23	FEMALE	SWITZERLAND	3	4	4	3	4	4	4	3	4	4	4	1	1	1	1	1	1	1	1	2	2	3	3	3	3	4	2	3	2	4	3	1	1	2	1	1	1	2	1	2	3	3	3	4	4	2	3
64	MALE	FRANCE	4	3	3	4	4	4	4	4	5	5	4	1	1	1	1	1	1	1	1	1	3	2	3	2	3	4	4	3	3	4	3	1	1	1	1	1	1	1	2	1	4	4	3	3	4	3	2
26	MALE	INDONESIA	5	5	3	5	3	2	3	3	5	5	5	1	1	2	1	2	1	1	2	1	3	5	3	5	1	1	5	5	5	5	3	1	2	5	1	1	1	5	2	3	3	5	3	5	3	1	3
66	FEMALE	USA	4	2	4	3	3	2	4	2	2	2	1	1	1	1	1	1	1	1	1	1	4	3	4	3	3	4	4	4	4	4	2	2	1	2	1	2	1	2	2	1	3	4	3	4	2	4	3
22	MALE	BELGIUM	3	4	2	4	2	3	4	2	3	4	1	1	1	1	1	1	1	1	1	1	2	1	2	1	1	3	2	2	2	2	2	4	4	2	2	3	3	2	2	2	2	4	1	4	1	1	2
23	FEMALE	FRANCE	3	4	1	3	3	3	4	2	2	1	2	1	1	1	1	1	1	1	1	1	2	1	1	1	1	1	1	1	2	1	1	1	1	3	1	1	1	1	1	2	2	2	2	3	1	1	2
58	FEMALE	SPAIN	4	4	3	3	2	3	4	3	5	3	1	1	1	1	1	1	1	1	1	1	2	1	1	1	1	3	1	1	2	2	2	2	1	2	1	1	1	2	1	2	4	3	3	4	3	5	4
47	MALE	BELGIUM	4	4	4	4	4	4	4	4	3	4	4	1	2	1	1	1	1	1	1	1	4	4	4	4	4	4	4	4	4	4	4	1	1	1	1	1	1	1	1	1	3	3	3	3	2	3	2
31	MALE	BRAZIL	4	2	3	1	4	4	5	2	2	2	1	1	1	1	1	1	1	1	1	1	1	1	2	1	1	2	1	2	1	5	1	2	3	5	5	5	1	5	2	2	5	5	5	5	5	5	4
23	MALE	BELGIUM	3	2	2	3	1	1	3	1	3	1	1	3	1	1	1	1	1	1	1	1	1	2	1	2	1	1	2	1	1	1	2	2	1	1	1	2	1	2	1	2	2	4	1	5	1	4	3
42	MALE	ISRAEL	4	3	1	3	1	3	4	1	3	3	1	1	1	1	1	1	1	1	1	1	3	1	1	1	1	3	2	1	3	3	3	3	2	2	1	2	1	1	1	1	2	1	1	2	1	2	1
21	FEMALE	BELGIUM	2	2	3	2	1	4	3	2	2	3	1	1	1	1	1	1	1	1	1	1	2	2	2	2	1	3	2	2	3	2	2	1	1	1	1	1	1	1	1	1	1	1	1	2	1	1	1
50	FEMALE	GERMANY	5	4	3	4	2	4	5	3	5	4	1	2	1	1	1	1	1	1	2	1	3	2	1	2	1	2	2	1	3	2	2	2	1	1	1	2	1	2	2	1	2	3	1	3	1	3	2
66	FEMALE	USA	4	1	1	1	1	4	4	1	4	1	2	1	1	1	1	1	1	1	1	1	3	1	1	1	1	2	1	1	3	1	2	1	1	1	1	1	1	1	1	1	5	5	4	5	2	5	2
58	FEMALE	SOUTH AFRICA	2	1	1	2	1	2	2	1	2	2	1	1	1	1	1	3	1	1	1	1	3	1	1	1	2	2	2	1	2	2	1	1	1	1	1	1	1	1	1	1	5	5	4	4	3	4	4
30	FEMALE	BELGIUM	4	1	2	3	1	3	4	2	4	1	2	3	3	1	1	1	1	1	1	1	3	1	2	1	1	2	3	1	2	1	2	4	3	1	1	1	1	1	1	2	3	4	3	4	4	4	2
21	FEMALE	BELGIUM	2	1	2	4	3	1	4	2	1	1	4	1	1	1	1	1	1	1	1	1	1	1	1	1	1	1	1	2	1	2	2	1	2	1	1	2	1	1	1	1	3	4	2	5	3	1	3
25	FEMALE	USA	3	2	2	2	3	2	2	1	2	1	1	2	2	1	1	1	1	1	1	1	2	1	1	1	2	1	2	2	2	1	2	4	3	2	1	1	2	1	1	1	2	3	3	4	2	4	3
23	FEMALE	BELGIUM	4	1	1	4	2	1	4	2	3	1	1	1	3	1	1	2	1	1	3	2	3	1	2	2	2	1	4	1	3	2	1	1	1	2	3	2	1	3	2	2	3	4	3	5	2	2	4
25	FEMALE	USA OF AMERICA	2	1	1	2	1	2	3	1	2	2	1	1	1	1	1	1	1	1	1	1	3	2	2	1	1	3	1	1	3	2	1	1	1	1	1	1	1	1	1	1	4	3	2	3	1	3	2
23	FEMALE	BELGIUM	2	1	1	1	1	1	2	1	1	1	2	4	1	1	1	2	1	1	3	1	1	1	2	1	1	1	1	1	1	1	1	3	1	1	1	1	1	1	1	1	4	4	4	4	2	1	3
34	MALE	USA	3	2	2	4	4	1	4	3	2	2	1	1	2	1	1	1	1	1	1	1	2	3	1	2	2	2	4	2	1	3	2	1	2	1	1	1	1	2	2	2	3	4	3	4	1	1	4
26	FEMALE	CANADA	2	1	2	3	2	3	4	1	2	3	2	2	1	1	1	1	1	1	1	1	2	2	2	1	2	1	4	1	1	1	2	3	1	2	1	1	1	1	1	2	2	4	4	4	3	4	3
26	MALE	VENEZUELA	3	3	2	3	3	2	4	2	5	3	5	4	2	1	1	1	4	1	1	1	2	2	2	1	1	1	2	1	3	1	2	3	1	4	4	2	1	4	5	4	2	2	2	2	2	3	1
24	MALE	BELGIUM	1	3	1	3	1	1	1	1	1	1	1	1	1	1	1	1	1	1	1	1	1	3	2	1	1	5	2	3	4	3	4	4	1	5	4	2	3	5	3	4	4	5	3	5	1	2	3
31	FEMALE	USA	3	1	2	3	2	2	4	2	2	1	1	1	1	1	1	1	1	1	1	1	1	1	1	1	1	1	1	1	1	1	1	1	1	1	1	1	1	1	1	1	2	2	1	3	2	3	1
58	MALE	USA	3	2	2	3	3	3	3	3	2	2	1	1	1	1	1	1	1	1	1	1	3	1	3	2	3	2	4	4	4	1	2	1	1	1	1	1	1	1	1	1	3	3	2	3	1	4	2
50	MALE	US	2	2	2	3	2	2	2	2	3	2	1	1	1	1	1	1	1	1	1	1	2	2	3	2	1	2	2	2	3	2	1	1	1	2	1	1	1	2	1	1	2	2	1	2	1	2	1
50	FEMALE	USA	1	4	2	3	3	2	4	2	3	2	1	1	1	1	1	1	1	1	1	1	3	2	2	3	3	2	5	3	3	2	1	1	1	1	1	1	1	1	1	1	3	5	4	4	1	5	3
22	FEMALE	BELGIUM	2	2	2	2	2	1	2	2	3	2	4	4	3	3	4	3	2	4	2	2	3	3	4	4	4	2	3	4	3	2	2	1	1	1	1	1	1	2	2	2	2	4	4	4	4	1	3
35	MALE	USA	5	2	3	2	2	2	3	3	4	2	1	1	1	1	1	1	1	1	1	1	4	1	1	1	1	2	3	3	2	2	2	1	1	2	1	1	1	2	1	2	3	4	2	3	1	3	3
22	FEMALE	BELGIUM	3	2	2	4	3	1	2	3	3	4	3	2	1	1	3	2	1	1	2	1	3	3	3	2	2	3	3	4	3	4	2	3	1	3	3	2	1	3	1	2	3	4	2	4	3	1	3
24	FEMALE	ITALY	4	1	2	2	1	2	4	2	3	3	2	1	3	1	1	1	1	1	1	1	2	2	2	2	1	4	2	3	2	3	3	3	3	4	3	2	3	4	3	4	3	3	3	3	1	2	3
28	MALE	USA	3	1	5	4	3	3	4	4	4	1	1	1	2	1	1	1	1	1	1	1	3	3	2	2	1	3	2	1	3	3	4	3	5	3	1	2	4	4	2	4	2	4	3	4	1	3	3
44	MALE	BELGIUM	3	2	3	3	2	4	2	1	4	3	1	1	1	1	1	1	1	1	1	1	2	2	1	2	1	2	1	1	2	1	1	2	1	1	1	2	1	1	2	1	4	3	2	4	2	4	3
24	MALE	BELGIUM	4	4	3	3	2	5	5	4	5	3	2	1	1	1	1	2	1	1	2	1	1	2	4	1	3	3	1	3	3	1	1	2	1	1	1	3	1	3	4	1	2	4	3	3	1	3	3
23	MALE	BELGIUM	2	1	2	2	1	1	3	2	2	2	3	1	1	1	1	1	1	1	1	1	3	1	3	1	3	1	2	1	1	1	1	1	1	1	1	1	1	1	1	1	2	4	2	4	1	1	2
54	MALE	BELGIUM	3	4	2	3	2	3	1	2	2	3	1	1	1	1	1	1	1	1	1	1	3	4	3	3	3	2	3	2	2	2	1	1	1	1	1	1	1	1	1	1	1	2	2	3	1	4	2
21	FEMALE	BELGIUM	2	1	1	1	1	1	4	1	2	1	4	1	1	1	1	2	1	1	1	1	2	1	1	2	1	1	3	1	2	1	4	1	1	1	1	1	1	1	2	1	1	2	1	2	1	1	3
22	MALE	BELGIUM	4	2	2	1	1	4	4	2	4	3	1	3	3	1	1	1	4	1	5	2	2	1	3	2	1	4	3	3	4	3	1	4	4	4	3	1	4	4	5	4	3	5	3	5	3	1	2
24	FEMALE	FRANCE	3	3	4	3	4	3	4	4	3	3	3	1	1	2	1	1	1	2	2	2	3	3	3	3	3	3	4	3	3	3	3	1	1	1	1	1	1	2	2	1	3	4	4	4	3	2	3
25	FEMALE	SPAIN	4	4	4	4	4	1	5	1	3	4	1	1	1	1	1	1	1	2	2	1	3	1	1	1	1	2	1	3	3	1	4	5	4	4	4	2	4	1	4	4	5	5	5	5	5	2	5
24	MALE	ROMANIA	4	3	3	3	3	3	4	3	4	2	1	1	1	1	1	1	1	1	1	1	3	2	2	1	2	3	2	3	3	2	3	2	2	2	1	1	1	3	3	3	3	4	3	4	1	2	3
28	FEMALE	USA	3	2	3	2	4	3	4	3	3	2	1	1	1	1	1	1	1	1	1	1	2	1	2	2	2	2	2	2	2	2	1	1	1	1	1	1	1	2	1	1	2	3	2	3	2	3	2
39	FEMALE	AUSTRIA	4	4	3	2	4	4	3	1	4	3	1	1	1	1	1	1	1	1	1	1	2	1	1	1	1	2	2	1	2	1	3	3	1	1	1	1	1	1	1	1	3	3	3	4	1	4	1
54	FEMALE	FRANCE (MORE PRECISELY: BRITTANY REGION)	2	1	1	2	1	1	2	1	5	1	1	3	1	1	1	1	1	1	1	1	1	1	1	1	1	1	1	1	2	1	3	4	1	1	1	1	1	1	1	1	4	5	5	5	1	5	5
22	MALE	BELGIUM	4	3	2	4	2	2	4	3	3	2	1	1	1	2	1	1	1	1	1	2	2	4	1	3	2	4	4	2	3	3	4	2	2	3	3	2	1	4	4	4	2	4	4	5	2	2	3
34	FEMALE	IRAN	3	2	3	3	4	3	4	4	3	2	1	1	1	1	1	1	1	1	1	1	1	2	1	1	1	3	1	1	4	3	2	3	2	3	2	1	3	3	2	3	4	4	2	4	1	3	3
75	MALE	FRANCE	5	1	4	4	2	2	4	3	5	2	4	4	3	2	1	1	1	4	4	1	5	5	4	5	4	4	4	3	5	2	3	5	3	3	3	2	1	2	4	3	4	3	4	4	2	4	3
31	FEMALE	GREECE	4	2	3	2	3	2	4	3	2	2	1	2	2	2	1	1	1	1	1	2	2	3	3	2	3	2	5	2	2	2	1	1	2	2	1	1	1	1	1	2	2	4	2	4	1	4	2
23	MALE	FRANCE	4	2	3	3	4	1	5	4	3	3	4	1	1	1	2	1	1	1	1	1	4	2	3	2	4	2	4	2	4	2	3	2	3	2	3	1	1	1	2	2	3	3	4	4	2	3	2
22	FEMALE	BELGIUM	4	1	1	3	3	4	3	2	5	2	5	1	1	1	1	1	1	1	1	1	3	2	3	2	1	2	3	3	3	2	3	2	1	1	1	1	1	3	3	2	2	4	1	4	2	1	3
26	FEMALE	BULGARIA	2	4	3	3	3	3	4	3	3	2	1	2	1	1	1	1	1	1	1	1	2	2	1	1	1	2	2	1	1	2	2	1	1	1	1	1	1	2	1	2	4	4	3	4	3	3	3
22	FEMALE	BELGIUM	4	1	3	4	2	2	3	1	2	2	1	1	1	1	1	1	1	1	1	1	2	1	2	4	1	2	3	2	3	2	1	1	1	1	1	1	1	1	1	1	3	4	2	4	1	4	4
24	FEMALE	BELGIUM	1	1	1	1	1	1	1	1	2	1	4	3	1	1	2	4	1	1	2	1	3	2	3	3	4	1	4	3	4	1	2	1	1	2	1	1	1	1	1	1	4	3	2	4	2	2	4
24	FEMALE	ITALY	3	2	1	3	3	2	5	3	2	3	4	1	1	1	1	1	1	1	1	1	4	3	3	1	1	4	2	2	3	2	1	4	2	1	1	1	1	4	5	2	2	4	3	2	1	1	2
40	FEMALE	BELGIUM	4	2	2	3	4	1	3	3	4	3	4	1	1	1	1	1	1	1	1	1	1	2	1	1	1	3	1	1	3	1	1	1	1	3	1	1	1	1	2	2	3	5	4	5	3	3	4
41	FEMALE	NEW ZEALAND	3	2	3	2	3	3	2	1	3	1	1	1	1	1	1	1	1	1	1	1	1	1	2	1	2	1	1	3	1	1	1	1	1	1	1	1	1	1	1	1	3	3	1	2	1	3	1
23	FEMALE	ITALY	4	4	3	4	4	1	4	3	2	3	1	1	1	1	1	1	2	1	1	1	3	2	1	2	1	4	2	3	4	3	3	2	2	4	3	2	1	3	3	3	4	4	4	4	4	2	5
25	MALE	FRANCE	1	1	1	1	1	1	1	1	2	2	2	3	1	1	2	1	2	2	2	1	4	2	2	2	3	4	3	2	4	4	3	2	1	1	1	1	2	2	1	2	2	3	1	3	1	1	2
41	FEMALE	SLOVAKIA	2	2	4	2	1	2	3	1	1	1	1	1	1	1	1	1	1	1	1	1	3	2	1	2	1	1	3	1	2	2	1	1	1	2	1	1	1	2	1	1	2	3	1	2	1	1	1
30	MALE	FINLAND	5	3	2	2	4	1	4	4	4	2	1	1	1	1	1	1	1	1	1	1	5	4	2	5	3	2	5	3	2	1	2	1	1	1	1	1	1	2	1	1	1	1	1	1	1	4	1
59	MALE	IRELAND	4	4	4	4	2	3	4	2	4	2	1	1	1	1	1	1	1	1	1	1	4	3	1	5	1	4	4	3	4	3	3	3	2	2	1	1	2	2	2	2	4	5	4	4	2	4	3
32	MALE	USA	3	2	2	2	2	2	3	3	2	1	1	1	1	1	1	1	1	1	1	1	4	1	2	1	1	4	3	3	3	2	3	4	2	3	1	1	2	2	1	2	3	3	2	3	1	4	2
37	MALE	AUSTRALIA	3	3	2	4	3	1	2	3	2	4	1	1	1	1	3	1	1	1	1	1	1	1	4	3	1	2	2	1	2	2	4	1	2	2	1	1	1	1	1	2	4	4	3	4	4	2	3
55	FEMALE	GERMANY	1	1	1	1	1	2	1	1	2	1	1	2	1	1	2	1	2	1	1	2	1	1	1	1	1	1	1	1	2	1	1	2	1	1	1	1	1	1	1	1	2	2	2	2	2	2	2
21	FEMALE	FRANCE	3	2	3	4	3	2	5	2	4	2	5	1	1	1	1	1	1	1	1	1	4	1	3	1	1	3	2	2	3	2	2	1	4	3	1	1	2	2	3	3	3	2	3	4	2	3	3
25	MALE	BELGIUM	3	2	4	3	3	1	4	3	3	2	2	1	1	1	1	1	1	1	1	1	4	4	4	4	4	4	3	3	4	3	1	2	1	2	1	1	1	1	1	1	5	4	4	4	4	5	4
25	MALE	DENMARK	4	4	2	4	2	1	3	2	3	2	1	1	1	1	1	1	1	1	1	1	2	2	2	2	2	3	3	2	3	2	2	2	1	2	1	1	1	1	1	2	3	2	3	2	2	2	2
26	FEMALE	CANADA	3	2	3	2	3	2	5	2	3	1	1	1	1	1	1	1	1	1	1	1	2	1	4	2	2	2	5	2	1	1	1	4	2	3	1	1	1	2	1	2	2	3	3	2	2	4	2
35	MALE	FINLAND	2	3	3	3	4	1	3	2	2	2	1	1	1	1	1	1	1	1	1	1	2	2	2	2	2	2	2	2	2	1	3	4	3	2	2	2	2	3	2	3	3	3	2	3	1	3	3
31	FEMALE	AUSTRIA	4	2	4	4	3	1	4	3	3	4	1	1	1	1	1	1	1	1	2	1	4	4	3	4	1	3	3	4	2	3	3	4	2	3	2	3	1	2	3	3	3	4	4	4	2	2	3
31	FEMALE	SLOVAKIA	4	2	1	2	1	2	3	1	2	2	1	3	1	1	1	1	1	1	1	1	1	1	1	1	1	1	1	1	1	1	3	3	1	1	1	1	1	1	1	1	2	1	1	2	1	3	2
36	MALE	UK	2	1	2	1	1	2	2	2	2	2	1	1	1	1	1	1	1	1	1	1	4	4	2	3	1	3	3	2	3	3	1	1	1	1	1	1	1	1	1	1	3	2	1	3	1	4	3
26	MALE	FRANCE	4	1	3	4	5	1	5	1	1	1	1	3	3	1	1	1	3	1	1	1	1	1	3	1	1	1	3	2	2	1	4	3	1	1	1	1	1	1	1	1	1	4	1	4	1	3	1
50	MALE	BELGIUM	3	2	2	3	1	3	3	2	2	2	1	1	1	1	2	2	1	1	1	1	3	3	2	3	1	2	4	2	3	2	1	1	1	1	1	1	1	1	1	1	3	4	2	4	1	4	4
53	MALE	GERMANY	4	3	3	3	2	1	4	1	4	3	2	1	1	1	1	2	1	1	1	1	4	3	3	4	2	1	3	2	3	2	2	2	1	2	2	1	1	1	1	1	3	3	1	3	1	3	3
25	FEMALE	LATVIA	4	2	3	3	2	2	2	2	5	2	1	2	1	1	1	1	1	2	1	1	5	4	4	2	1	4	4	2	5	3	2	2	1	2	1	2	1	2	1	2	2	2	2	2	2	5	1
68	FEMALE	UK	2	1	1	1	1	1	1	1	3	1	1	1	2	1	1	1	1	1	1	1	2	1	1	1	1	1	1	1	3	1	1	1	1	1	1	1	1	1	1	1	2	1	1	1	1	1	1
32	FEMALE	POLAND	3	2	5	2	5	3	2	3	5	3	1	3	1	1	1	1	1	1	1	1	3	1	1	1	1	3	1	1	3	1	2	1	1	1	1	3	1	1	2	1	2	3	2	3	1	3	3
22	FEMALE	BELGIUM	3	1	2	3	2	1	4	2	4	2	1	1	1	1	1	1	1	1	1	1	3	1	2	1	1	3	2	1	2	1	2	2	1	2	3	1	2	4	3	1	3	4	3	4	2	1	3
28	FEMALE	USA	2	3	4	2	4	3	3	3	1	3	1	1	3	1	1	1	3	1	1	1	2	2	2	2	1	3	2	2	1	2	1	1	3	1	1	1	3	1	1	1	4	5	5	5	1	5	5
37	FEMALE	FRANCE	2	1	1	2	1	1	1	1	2	1	2	2	1	1	1	1	1	1	1	1	4	3	4	4	1	4	4	3	4	4	1	1	1	1	1	1	1	1	1	1	3	3	2	3	1	4	2
30	FEMALE	UK	3	2	2	2	2	2	4	1	3	1	1	1	1	1	1	1	1	1	1	1	3	2	2	2	1	2	2	1	3	1	1	3	1	1	1	1	1	1	2	2	2	2	1	2	1	2	1
39	MALE	GERMANY	2	5	2	3	1	1	1	2	2	1	4	2	4	3	3	3	1	2	3	1	4	4	5	4	3	2	4	4	3	3	3	1	1	2	1	1	1	2	1	1	2	1	3	2	1	1	2
24	MALE	BELGIUM	3	3	3	4	3	1	4	3	3	4	3	1	1	1	1	2	1	2	2	1	3	4	4	4	3	3	3	4	3	4	3	1	2	2	2	1	1	2	2	2	3	4	3	4	2	1	2
64	MALE	UK	2	1	2	2	2	2	1	2	2	2	1	1	1	1	1	1	1	1	1	1	1	1	1	1	1	1	1	1	2	1	1	1	1	1	1	1	1	1	1	1	4	4	2	4	3	2	3
69	FEMALE	USA	2	1	1	2	1	1	1	1	2	1	1	1	1	1	1	1	1	1	1	1	4	3	1	4	3	4	4	2	5	2	1	1	1	1	1	1	1	1	1	1	3	2	1	3	1	4	1
47	MALE	USA	3	1	1	1	1	1	3	1	1	1	1	1	1	1	1	1	1	1	1	1	2	1	1	1	1	1	1	1	1	1	2	2	1	1	1	2	1	2	1	1	4	4	1	4	1	1	5
51	MALE	NL	3	1	1	1	1	1	2	1	2	1	1	1	2	1	1	1	1	1	1	1	2	2	2	1	1	2	1	2	2	2	1	1	4	4	1	1	1	1	1	3	3	5	4	4	1	3	4
40	FEMALE	USA	1	1	1	1	1	1	1	1	1	1	1	1	1	1	1	1	1	1	1	1	1	1	1	1	1	1	1	1	1	1	1	1	1	1	1	1	1	1	1	1	2	2	1	2	1	1	1
57	MALE	USA	3	2	2	1	1	3	2	2	3	2	1	1	1	1	1	1	1	1	1	1	4	2	3	1	2	3	4	4	4	3	2	1	1	1	1	1	1	1	1	1	4	4	3	4	2	4	2
26	FEMALE	NETHERLANDS	2	1	1	1	1	1	2	1	1	1	1	1	1	1	1	1	1	2	2	1	2	1	2	2	1	2	2	2	3	2	1	1	1	1	1	1	1	1	1	1	3	4	2	4	1	4	4
58	MALE	USA	5	2	4	2	3	3	5	3	4	2	1	1	1	1	1	1	1	1	1	1	2	2	3	2	2	2	2	1	2	2	1	1	1	1	1	1	1	1	1	1	4	4	3	4	3	2	3
41	MALE	BELGIUM	4	3	3	2	3	1	2	2	2	2	2	1	1	2	1	1	1	1	1	2	4	4	2	3	3	3	4	2	3	2	1	1	1	1	1	1	1	1	1	1	4	4	2	4	2	4	3
22	FEMALE	BELGIUM	4	3	2	3	2	1	4	2	3	4	4	1	1	1	1	1	1	1	1	1	1	1	1	1	1	3	1	2	4	2	1	3	2	4	4	4	3	4	5	4	2	5	3	5	1	3	2
26	FEMALE	NETHERLANDS	4	3	1	4	1	1	4	2	4	2	1	1	1	1	1	1	1	1	1	1	4	4	4	4	2	3	4	4	3	2	1	1	1	1	1	1	1	1	1	2	2	2	1	3	1	3	1
30	FEMALE	USA	3	2	2	2	2	3	3	2	3	2	2	2	1	1	1	1	1	1	1	1	3	1	1	1	1	2	1	1	3	1	2	2	1	2	1	1	1	1	2	1	4	3	2	4	4	4	2
24	MALE	FRANCE	3	2	2	3	2	2	4	4	4	2	3	2	1	2	1	2	1	2	2	2	4	2	2	2	2	2	3	4	4	3	2	1	1	2	2	2	1	2	3	1	3	3	3	4	2	3	2
36	MALE	ITALY	3	1	2	2	1	2	2	2	2	2	3	1	2	1	1	1	1	1	1	1	3	2	2	3	2	2	3	2	2	2	2	1	2	1	1	1	2	1	2	1	3	3	2	3	2	3	3
38	MALE	BELGIUM	5	1	4	2	1	3	5	2	5	1	3	4	2	1	1	1	2	1	1	1	3	2	2	2	2	3	3	2	4	2	3	3	2	1	1	1	2	2	1	1	3	4	3	4	2	4	3
34	MALE	NORWAY	4	2	2	2	3	2	3	3	4	2	1	1	1	1	1	1	1	1	2	1	2	3	3	2	4	3	3	3	3	2	3	2	1	1	1	1	1	2	2	1	3	4	2	3	1	4	3
25	FEMALE	TAIWAN	1	2	5	3	3	1	5	2	2	3	1	1	1	1	1	1	1	1	1	1	3	4	5	3	3	4	3	5	2	5	1	1	1	2	1	1	1	2	1	1	5	5	5	5	3	1	5
59	FEMALE	USA	2	1	1	1	1	1	2	1	3	1	2	2	1	1	1	1	1	1	1	1	1	1	1	1	1	1	1	1	1	1	2	2	1	1	1	1	1	1	1	1	2	1	1	2	1	3	1
36	MALE	FANCE	4	3	3	2	2	2	5	2	4	3	2	2	2	1	1	1	1	1	1	1	3	1	1	1	1	1	3	1	4	2	4	4	2	1	1	1	2	2	2	1	3	4	4	4	3	4	3
27	FEMALE	FRANCE	4	2	4	4	1	3	5	4	5	1	5	4	1	1	1	1	1	1	1	1	4	1	3	4	1	3	3	3	4	1	5	3	1	1	1	1	1	1	1	2	2	2	1	2	1	3	2
21	MALE	BELGIUM	2	1	1	1	1	1	1	1	4	2	1	2	1	1	1	1	1	1	1	1	5	1	1	4	1	1	2	1	2	3	5	1	1	2	1	1	1	1	1	2	1	1	1	1	1	2	1
50	FEMALE	USA	4	3	3	2	4	2	4	3	3	3	1	1	1	1	1	1	1	1	1	1	3	1	3	2	3	2	3	2	1	2	1	1	1	1	1	1	1	1	1	1	4	4	4	4	3	4	4
30	FEMALE	SWEDEN	5	2	3	4	3	1	4	4	4	2	2	3	2	1	1	1	1	1	1	1	2	1	3	3	1	2	3	1	2	3	2	3	1	2	1	1	2	2	1	2	2	5	4	4	1	3	3
26	FEMALE	LUXEMBOURG	4	3	5	4	4	1	5	1	5	4	1	1	1	1	1	1	1	1	1	1	5	5	5	4	4	1	5	5	5	4	1	1	1	1	1	1	1	1	1	1	5	5	3	5	3	1	5
70	MALE	CANADA	2	1	1	1	1	1	1	1	3	1	1	1	1	1	1	2	1	1	1	1	3	2	2	3	1	4	2	2	4	1	1	1	1	1	1	1	1	1	1	1	4	4	3	4	2	4	4
53	MALE	BELGIUM	4	2	3	3	2	3	4	2	3	2	1	1	1	1	1	1	1	1	1	1	4	2	4	4	3	3	4	2	3	3	2	1	1	2	1	1	1	2	1	2	4	4	3	5	2	4	3
24	MALE	CHINE	4	1	1	1	3	1	2	1	1	1	1	1	1	1	1	1	1	1	1	1	2	2	2	1	1	3	1	2	1	1	1	1	1	1	1	1	1	2	2	1	1	3	3	4	2	1	2
34	FEMALE	BRASIL	5	3	1	1	1	1	2	2	4	1	1	1	3	1	1	1	1	1	1	1	4	1	3	4	1	3	4	3	3	3	2	2	1	2	2	1	1	2	1	2	2	4	2	3	2	4	3
20	FEMALE	ITALY	5	5	5	5	5	2	5	4	4	4	1	1	1	1	1	1	1	1	1	1	3	2	3	2	3	5	3	2	5	3	1	1	1	1	1	2	1	1	1	2	2	5	4	5	2	1	4
38	MALE	GERMANY	3	2	3	3	1	1	4	2	3	3	1	1	1	1	1	1	1	1	1	1	1	1	2	2	1	1	1	1	2	4	1	1	1	1	1	1	1	3	2	1	5	4	4	5	3	2	5
22	FEMALE	BELGIUM	4	1	2	3	3	1	4	3	4	2	4	1	1	1	1	1	1	1	1	1	2	1	1	1	1	3	2	1	2	1	2	1	1	2	1	1	1	3	1	2	1	3	1	3	1	1	3
33	MALE	UK	2	1	2	2	2	3	4	1	3	1	1	1	1	1	1	1	1	1	1	1	2	1	3	1	1	2	2	2	2	2	1	1	2	1	2	1	2	1	1	1	1	1	1	1	1	1	1
31	MALE	CANADA	5	4	2	3	2	2	4	2	2	2	2	1	1	1	1	1	1	2	1	1	4	5	2	4	3	4	5	4	4	3	4	1	2	3	2	1	1	3	4	2	1	1	1	2	1	2	1
30	FEMALE	GREECE	2	4	3	3	2	1	3	2	2	3	1	1	1	1	1	1	1	1	1	1	4	4	4	4	4	3	4	4	3	3	1	1	1	1	1	1	1	2	3	1	4	5	4	4	1	2	4
37	FEMALE	SPAIN	1	1	1	1	1	1	2	1	2	1	3	1	1	1	1	1	1	1	1	1	2	1	1	1	1	3	1	1	3	1	1	2	1	3	2	1	1	2	2	3	4	4	4	4	1	4	1
28	MALE	VENEZUELA	1	3	1	1	1	1	2	2	3	2	4	3	2	2	1	1	1	2	1	3	1	2	2	3	1	3	4	2	1	2	2	3	1	1	1	1	1	1	1	2	4	3	2	4	2	3	4
33	FEMALE	SPAIN	4	2	3	2	1	1	3	1	3	2	1	1	1	1	1	1	1	2	1	1	4	4	3	4	3	2	4	4	4	4	1	1	1	1	1	1	1	1	1	1	4	5	3	5	3	2	4
30	FEMALE	ITALY	3	3	2	3	4	2	5	4	4	2	3	3	1	1	1	1	3	1	1	2	2	2	1	2	1	3	2	1	2	2	1	3	3	2	3	3	2	4	4	4	1	2	3	3	1	2	1
32	FEMALE	GERMANY	3	3	2	3	2	2	4	2	4	2	1	1	1	1	1	1	1	1	1	1	4	3	4	3	2	3	4	3	3	3	1	1	1	1	1	1	1	1	1	1	1	1	1	1	1	1	1
34	FEMALE	NETHERLANDS	4	3	1	3	3	2	3	1	2	1	3	1	1	1	1	1	1	1	1	1	4	3	3	2	1	3	3	1	3	3	1	2	1	2	1	1	1	3	2	3	3	3	2	4	1	3	3
28	FEMALE	GERMANY	1	1	1	1	1	1	1	1	1	1	1	3	1	1	1	2	1	1	2	1	2	1	2	1	2	2	4	2	3	1	1	2	2	1	1	1	1	1	1	1	1	2	1	2	1	2	1
35	MALE	SWEDEN	1	1	1	1	1	1	1	1	1	1	1	1	1	1	1	1	1	1	1	1	1	1	1	1	1	1	1	1	1	1	1	1	1	1	1	1	1	1	1	1	1	1	1	1	1	1	1
20	MALE	BRAZIL	2	1	2	2	2	2	3	3	3	2	1	1	1	1	1	1	3	2	2	1	4	3	3	2	2	2	4	3	3	3	2	1	2	2	1	1	1	2	2	2	3	4	3	3	2	3	2
26	MALE	NETHERLANDS	3	1	2	1	2	2	3	4	2	1	1	4	4	3	1	1	4	2	1	3	2	1	2	1	1	2	2	1	1	1	3	1	2	2	1	1	1	2	1	2	3	4	3	5	1	4	4
30	FEMALE	ITALY	3	2	3	3	3	2	4	3	2	2	1	1	1	1	1	1	1	1	1	1	3	1	2	1	1	3	3	2	2	2	2	2	1	3	2	2	1	2	2	2	4	5	4	5	3	4	4
38	MALE	FRANCE	4	4	4	5	4	4	5	4	3	4	1	1	1	1	1	1	1	1	1	1	2	3	3	3	1	2	3	3	2	3	2	2	1	2	1	2	1	2	1	2	4	4	4	4	4	4	4
52	MALE	UK	1	2	1	1	1	1	2	1	2	2	1	1	1	1	1	1	1	1	1	1	1	1	1	1	1	2	1	1	3	1	1	1	1	1	1	1	1	1	1	1	1	2	1	2	1	2	1
29	FEMALE	BELGIUM	2	1	2	2	2	1	2	1	2	2	2	4	2	1	1	1	2	1	1	1	2	1	2	3	2	1	3	3	2	2	2	2	1	1	1	1	1	1	1	1	3	4	3	4	3	3	3
42	FEMALE	SWEDEN	1	1	1	1	1	3	1	1	3	1	1	1	1	1	1	1	1	1	1	1	1	1	1	1	1	1	1	1	1	1	1	1	1	1	1	1	1	1	1	1	2	2	1	1	1	1	1
39	MALE	ITALY	5	4	3	4	2	3	4	4	5	4	2	1	1	1	1	1	1	1	1	1	2	2	1	1	1	2	2	2	3	3	2	2	2	1	2	2	2	2	2	2	1	2	1	1	1	1	2
22	FEMALE	USA	2	2	2	2	1	1	2	2	2	1	1	1	1	1	1	1	1	1	1	1	2	1	1	1	1	2	1	1	1	1	1	1	1	1	1	1	1	1	1	1	3	2	1	2	1	2	1
31	FEMALE	ITALY	2	1	1	1	1	3	3	1	2	1	2	2	1	1	1	3	1	4	4	2	4	3	3	4	4	4	4	4	3	4	1	1	2	2	2	1	1	3	2	2	2	2	3	3	2	3	1
28	FEMALE	USA	5	1	3	2	3	2	2	4	4	1	1	1	2	1	1	1	1	1	1	1	1	1	1	1	1	1	1	1	1	1	1	1	1	1	2	1	1	1	2	1	3	2	3	3	2	2	2
25	MALE	BRAZIL	4	4	3	4	3	1	4	3	1	4	4	1	1	2	1	1	2	1	1	1	4	4	2	5	1	4	3	4	5	4	1	2	4	4	2	2	3	4	5	4	5	5	4	5	2	3	4
30	MALE	BRAZIL	5	3	2	3	1	2	4	3	4	2	1	1	1	1	1	1	1	1	1	1	5	4	4	4	1	3	5	4	4	3	1	1	1	1	1	1	1	1	1	1	4	5	3	5	1	4	4
43	MALE	JAPAN	3	2	2	3	4	1	3	2	4	2	1	1	1	1	1	1	1	1	1	1	3	2	4	3	4	3	4	4	2	2	4	1	2	4	1	2	1	3	2	4	3	3	3	3	1	2	2
26	FEMALE	FRANCE	2	1	2	3	1	1	4	1	5	2	4	1	1	1	1	1	1	1	1	1	4	1	3	3	2	2	4	3	4	2	3	1	1	1	1	1	1	1	1	1	2	1	1	2	1	2	1
32	MALE	IRAN	4	2	3	4	4	2	5	2	3	3	1	2	1	2	1	1	1	2	1	1	2	3	4	2	1	3	2	2	3	1	3	3	2	3	3	3	2	4	3	3	3	3	1	2	2	2	2
37	FEMALE	ECUADOR	5	3	5	5	5	4	5	4	2	4	4	1	2	1	1	1	1	1	1	1	2	2	1	1	1	2	2	2	2	1	3	2	1	2	1	1	2	1	1	3	4	5	4	5	4	5	4
38	MALE	FRANCE	3	1	3	2	1	1	3	1	4	1	4	2	1	1	1	1	1	2	1	1	2	1	1	1	1	3	1	1	2	1	2	2	1	3	1	2	1	2	1	3	3	3	1	3	1	1	2
21	FEMALE	BELGIUM	3	2	2	4	1	4	4	4	4	2	5	1	1	1	2	1	1	1	1	1	4	1	4	1	1	2	2	4	4	2	1	1	1	2	4	2	1	1	4	2	2	5	2	5	1	3	2
45	FEMALE	PHILIPPINES	3	3	3	3	3	3	3	3	3	3	1	1	1	1	1	1	1	1	1	1	2	2	1	1	1	1	1	1	1	1	1	2	1	1	1	1	1	1	2	1	4	4	4	3	3	3	3
22	MALE	BELGIUM	4	3	3	4	3	3	4	3	4	2	1	1	1	1	1	1	1	1	1	1	3	1	3	1	1	3	3	3	3	3	4	2	3	2	1	1	2	2	1	1	3	4	3	5	2	3	3
25	FEMALE	FRANCE	1	1	1	1	1	3	3	1	4	1	2	3	1	1	1	1	1	2	1	1	5	4	3	3	1	3	3	1	4	3	1	1	1	1	1	1	1	1	1	1	1	4	2	4	1	4	1
74	MALE	USA	3	1	2	3	1	3	3	2	4	2	1	1	1	1	1	1	1	1	1	1	4	2	4	3	5	4	4	4	3	3	1	1	1	1	1	1	1	1	1	1	3	4	3	3	2	4	1
45	MALE	MEXICO	5	3	3	4	3	2	5	3	4	2	1	1	1	1	1	1	1	1	1	1	2	1	1	1	1	2	1	1	2	1	2	1	1	1	1	1	1	1	1	1	2	4	3	4	4	2	1
31	MALE	BELGIUM	3	3	3	4	1	2	2	2	3	1	4	1	1	1	1	1	1	1	1	1	1	1	1	1	1	2	1	2	1	1	1	3	1	2	3	2	3	2	2	2	4	3	3	3	3	2	4
63	MALE	CANADA	2	2	2	2	2	3	4	1	2	3	1	2	1	1	1	1	1	1	1	1	1	1	2	2	1	1	2	1	1	1	1	1	1	1	1	2	1	1	1	1	1	2	1	2	1	2	1
25	MALE	INDIA	3	3	3	2	2	2	3	2	1	3	1	1	1	1	1	1	1	1	1	1	4	4	4	4	3	3	4	4	4	4	1	1	1	1	1	1	1	1	1	1	5	4	3	4	4	5	4
24	MALE	BELGIUM	3	1	2	3	2	1	3	1	4	1	4	1	1	1	1	1	1	1	1	1	3	2	2	2	1	1	1	2	4	1	3	1	1	2	1	1	2	2	2	2	1	3	2	3	1	1	2
21	MALE	BELGIUM	2	1	1	1	1	4	3	2	2	1	1	2	4	3	1	2	3	3	3	3	2	2	1	2	1	2	3	2	1	1	1	3	1	4	2	4	2	4	3	4	3	4	2	4	3	3	3
27	MALE	ITALY	3	1	3	2	1	3	3	2	1	1	3	1	1	1	1	2	1	1	1	1	1	1	3	1	1	2	3	1	1	1	2	1	1	1	1	1	1	1	1	1	1	2	1	3	1	3	1
55	FEMALE	FRANCE	2	1	1	1	1	1	2	1	2	1	2	1	1	1	1	1	1	1	1	1	1	1	1	1	1	1	1	1	1	1	1	1	1	1	1	1	1	1	1	1	4	2	3	4	1	4	4
23	MALE	FRANCE	4	2	3	2	3	1	4	2	4	2	4	3	3	1	1	3	2	1	1	1	3	2	2	4	4	1	4	5	4	2	3	3	3	1	1	1	1	1	1	1	4	4	3	4	2	1	1
21	FEMALE	JAPAN	4	4	2	3	4	2	4	3	2	2	2	2	2	1	1	2	1	2	1	1	3	2	2	2	2	3	2	2	2	2	3	4	2	4	2	3	2	4	3	4	2	3	2	3	1	2	2
48	FEMALE	ISRAEL	4	3	3	3	1	4	4	3	4	2	1	1	1	1	1	1	1	1	2	1	2	2	1	2	1	3	2	1	2	2	1	1	1	1	1	1	1	1	1	1	3	4	2	4	1	4	3
28	FEMALE	MEXICO	3	2	3	2	3	2	4	4	2	2	3	2	1	1	1	2	1	2	3	1	2	3	1	1	1	1	2	2	2	1	4	1	2	2	2	2	2	2	3	3	1	4	2	5	2	2	3
27	FEMALE	GERMANY	4	5	3	4	3	1	2	1	4	1	1	1	1	1	1	1	1	1	3	1	2	1	1	1	1	1	1	1	1	1	1	1	2	2	1	1	1	1	5	2	2	4	5	5	4	1	4
23	FEMALE	POLAND	4	1	2	1	1	3	4	1	4	2	1	2	1	1	1	1	1	1	1	1	3	1	1	1	1	2	3	3	2	1	5	5	2	3	1	1	3	4	1	3	3	4	3	4	1	2	2
22	FEMALE	SPAIN	4	2	4	2	4	2	5	5	3	2	1	1	1	1	1	1	1	1	4	1	1	1	2	1	1	3	1	1	2	1	1	2	2	4	2	2	1	2	1	2	4	4	2	3	3	1	4
54	FEMALE	SWITZERLAND	3	2	4	3	2	5	4	3	5	4	2	2	2	1	1	1	2	1	1	1	2	2	1	1	1	2	2	1	3	2	2	2	1	2	2	2	1	2	1	2	2	3	3	3	2	4	2
27	FEMALE	BELGIUM	4	4	3	4	4	3	4	4	3	3	1	1	1	1	1	1	1	1	1	1	2	1	2	2	1	2	1	1	2	2	1	1	1	1	1	2	1	1	2	1	4	5	4	5	3	4	4
27	FEMALE	SWITZERLAND	2	1	4	1	1	4	3	2	4	3	2	1	1	1	1	1	1	1	1	1	1	1	1	1	1	3	1	1	2	1	4	2	1	1	3	1	1	1	4	3	2	3	4	4	2	2	4
33	FEMALE	ITALY	4	1	2	1	1	1	2	2	3	2	1	1	2	1	1	1	1	1	1	1	3	1	1	1	1	4	1	2	2	1	3	2	4	1	2	1	1	4	5	5	3	4	4	5	4	5	2
30	FEMALE	FRANCE	5	3	4	5	4	2	5	4	5	2	1	1	1	1	1	1	1	1	1	1	2	2	2	1	1	1	2	1	2	2	1	1	1	1	1	1	1	1	1	1	3	3	1	3	1	3	1
29	FEMALE	ARGENTINA	1	1	1	1	1	1	2	1	2	1	4	1	1	1	1	1	1	1	1	1	4	3	1	2	1	3	3	2	3	3	2	2	1	3	1	1	1	2	3	2	4	5	3	5	4	2	2
26	MALE	BELGIUM	1	1	1	1	1	1	1	1	3	1	1	1	1	1	1	1	1	1	1	1	1	1	2	1	1	2	2	1	2	1	1	1	1	1	1	1	1	1	1	1	1	2	1	2	1	1	1
49	FEMALE	GERMANY	3	2	2	2	1	2	3	2	3	2	2	1	1	1	1	1	1	2	1	1	2	2	3	2	1	2	1	3	3	1	4	1	2	2	1	1	1	1	1	1	3	4	4	4	3	4	4
21	MALE	BRASIL	3	3	1	3	2	1	3	2	2	2	1	1	1	2	1	1	1	1	1	1	3	3	5	4	4	3	5	5	3	3	1	1	1	1	1	1	1	1	1	1	4	3	2	4	2	2	3
27	FEMALE	USA	4	2	2	5	2	1	4	1	2	1	1	1	1	1	1	1	1	1	1	1	3	1	3	1	1	1	2	3	1	1	1	3	1	1	1	1	1	2	1	1	3	3	2	4	1	1	2
33	MALE	BRASIL	4	3	3	3	2	2	3	3	4	3	1	1	1	1	1	1	1	1	3	1	3	2	2	2	1	2	3	2	4	2	1	1	1	2	1	1	1	2	2	1	3	4	3	4	2	1	2
54	MALE	KENYA	3	4	3	3	3	3	3	3	3	3	1	1	1	1	3	1	1	1	1	1	3	4	4	3	3	4	3	3	4	2	1	4	1	4	2	3	1	4	2	4	3	3	3	3	2	4	1
33	FEMALE	TURKEY	5	5	1	5	2	1	5	1	1	1	2	2	1	1	1	1	1	1	1	1	3	2	1	3	1	2	3	1	2	2	4	2	1	1	1	1	1	2	1	1	4	4	3	5	2	2	5
28	FEMALE	UK	3	2	4	2	4	2	3	2	2	2	3	1	1	1	1	2	1	2	2	1	3	2	2	2	1	1	2	2	4	1	2	2	1	1	1	2	1	2	2	1	4	4	3	4	2	2	2
27	FEMALE	GERMANY	3	2	2	4	2	2	4	4	4	2	1	1	1	1	1	1	1	1	1	1	3	3	4	2	3	2	4	3	2	4	1	1	1	1	1	1	1	1	1	1	4	4	3	4	2	5	4
33	FEMALE	UK	3	1	4	2	1	3	2	2	3	3	1	1	1	1	1	1	1	1	1	1	2	1	2	1	1	2	2	1	2	1	1	1	1	1	1	1	1	1	1	1	3	3	2	2	1	3	2
36	MALE	SOUTH KOREA	5	3	1	5	1	3	5	1	5	2	1	1	3	1	1	1	1	1	1	1	5	5	2	5	1	5	5	1	5	1	1	1	2	1	1	1	1	1	1	1	1	2	1	1	1	1	1
31	FEMALE	UK	3	2	3	3	1	2	4	3	3	2	1	1	1	1	1	1	1	1	1	1	4	3	2	3	1	3	4	3	4	2	1	1	1	2	1	1	1	1	1	1	2	2	1	1	1	3	1
31	FEMALE	SPAIN	3	3	3	4	4	2	4	3	3	4	5	1	1	1	1	1	1	1	1	1	2	2	1	1	1	3	2	1	1	1	2	4	1	1	2	1	1	1	1	3	4	5	5	5	2	3	5
35	FEMALE	TURKEY	2	1	1	2	1	1	2	1	3	1	1	2	1	1	1	1	1	1	1	1	1	1	1	2	1	1	1	1	3	1	1	1	1	1	1	1	1	1	1	1	1	2	2	1	1	1	1
31	FEMALE	PORTUGAL	3	2	2	3	3	2	2	1	2	2	1	1	1	1	1	1	1	2	1	1	2	2	3	1	2	4	2	1	2	3	2	2	1	2	1	1	1	2	1	2	2	4	1	4	1	4	2
24	MALE	SPAIN	1	1	1	1	1	1	1	1	1	1	2	1	3	4	3	3	2	4	2	4	3	3	4	2	4	2	4	3	2	2	2	1	1	1	1	1	1	1	1	2	1	1	2	2	2	2	1
24	FEMALE	NETHERLANDS	4	3	3	3	3	4	4	3	2	3	1	2	1	1	2	1	1	2	2	1	2	2	2	2	2	2	2	2	2	2	4	3	3	3	2	3	2	3	2	4	3	4	4	4	3	3	3
39	MALE	FRANCE	4	1	2	3	3	1	2	2	3	3	4	1	1	1	1	1	1	1	1	1	3	1	2	3	3	1	3	3	3	2	3	1	1	1	1	1	1	1	1	1	2	2	2	4	1	1	2
71	MALE	BELGIUM	2	1	1	2	1	1	1	1	1	1	2	2	1	1	4	3	4	2	1	1	3	3	3	2	2	1	3	3	3	3	1	1	1	1	1	2	1	1	1	1	4	4	4	4	4	4	4
67	MALE	BELGIUM	4	4	4	4	4	4	5	4	4	4	1	1	1	1	1	1	1	1	1	1	2	1	2	2	1	2	3	2	3	2	2	1	2	2	1	1	2	1	1	2	4	3	4	4	4	4	4
36	MALE	UK	4	3	2	2	1	2	3	1	2	3	1	1	1	1	1	1	1	1	1	1	2	1	2	1	2	2	3	3	3	2	2	2	2	1	1	1	1	1	1	1	3	3	3	4	3	4	2
21	MALE	ITALY	1	2	2	2	2	1	2	1	1	1	3	1	1	1	1	1	1	1	1	1	4	3	3	2	4	3	3	1	3	1	1	3	1	1	1	1	1	1	2	1	2	3	1	3	1	1	3
35	MALE	BELGIUM	5	2	4	5	5	2	5	1	5	2	1	3	2	1	1	1	2	3	2	1	1	1	1	1	1	1	4	1	4	1	2	2	2	1	1	1	2	1	1	2	1	3	1	3	1	1	1
42	MALE	ISRAEL	3	2	3	4	4	3	4	2	3	2	1	1	1	2	1	1	1	1	3	2	4	2	2	2	2	3	2	2	2	2	3	3	3	3	3	4	1	4	3	4	3	4	4	4	1	4	2
58	MALE	USA	2	1	1	3	1	1	2	2	2	2	1	1	1	1	1	1	1	1	1	1	3	2	1	2	2	2	4	3	3	2	1	1	1	1	1	1	1	1	1	1	1	2	1	2	1	3	2
36	MALE	NEW ZEALAND	3	3	1	2	2	1	4	1	3	2	1	1	1	1	1	1	1	1	1	1	3	2	1	2	2	1	2	1	3	2	2	2	1	2	1	1	2	2	2	2	3	4	2	4	2	2	3
32	FEMALE	GERMANY	4	2	2	2	3	2	4	1	5	1	2	1	1	1	1	1	1	2	3	1	2	3	3	1	1	2	2	1	3	1	2	4	1	2	1	1	2	2	1	2	5	2	4	4	2	2	4
30	MALE	SPAIN	3	3	3	3	1	1	3	1	1	3	1	1	1	1	1	1	1	1	1	1	3	1	1	3	1	1	3	1	1	1	1	1	1	1	1	1	1	1	1	1	2	1	1	3	1	1	1
50	FEMALE	SPAIN	3	3	2	2	3	1	4	2	1	2	4	1	1	1	1	1	1	1	1	1	2	1	3	1	2	1	2	1	1	1	1	5	1	2	1	1	1	1	2	2	3	4	5	5	4	3	3
41	FEMALE	USA	3	2	1	1	1	2	1	1	3	3	1	1	1	1	1	1	1	1	1	1	2	2	2	1	1	2	2	1	2	2	1	1	1	1	1	1	1	1	1	1	2	3	1	1	1	3	1
39	MALE	USA	3	2	1	2	2	1	2	2	2	2	1	1	1	1	1	3	1	1	1	1	4	2	2	2	1	4	3	3	3	2	3	2	1	1	1	1	1	2	1	1	3	4	3	4	2	4	2
23	MALE	USA	3	1	3	2	1	2	1	1	2	2	1	1	1	1	1	1	1	1	1	1	3	2	3	2	1	1	2	3	3	2	1	1	1	1	1	1	1	1	1	1	3	4	3	3	3	2	3
36	FEMALE	BRAZIL	1	1	1	1	3	1	5	1	1	1	1	1	1	1	1	1	1	1	1	1	1	1	1	1	1	1	1	1	1	1	1	1	1	1	1	1	1	1	1	1	1	4	1	4	1	3	2
17	FEMALE	LITHUANIA	5	2	2	2	5	2	5	4	2	2	4	3	3	1	4	1	1	1	2	1	2	2	4	3	2	2	3	3	2	1	2	4	3	2	2	2	1	1	1	1	4	4	1	4	3	1	3
17	MALE	BELGIUM	5	3	2	3	2	4	5	2	4	2	1	1	1	1	1	1	1	1	1	1	5	2	1	2	3	5	5	1	5	2	2	2	3	1	1	1	1	2	1	1	1	1	1	1	1	1	1
54	MALE	NETHERLANDS	2	2	1	2	2	1	2	2	1	2	3	1	2	1	1	1	1	1	2	1	1	2	3	1	1	1	1	1	1	1	3	3	3	3	2	1	3	2	2	3	2	3	3	3	2	3	2
45	FEMALE	USA	4	2	1	2	1	3	2	2	4	2	1	1	1	1	1	1	1	1	1	1	3	3	3	2	1	3	4	2	2	2	1	1	1	1	1	1	1	1	1	1	2	1	3	1	1	3	1
25	MALE	USA OF AMERICA	4	4	2	4	3	3	4	3	3	2	1	1	1	1	1	1	1	1	1	1	1	1	1	1	1	3	1	1	2	1	3	2	2	3	1	1	2	2	2	3	2	4	3	4	3	3	2
37	FEMALE	BRAZIL	3	5	3	4	4	5	5	5	4	4	1	2	1	1	1	1	1	1	1	1	3	1	1	1	2	2	2	1	3	3	5	5	4	3	5	3	2	4	2	4	3	4	4	4	1	5	3
24	MALE	CANADA	1	1	3	1	2	1	1	2	2	1	1	1	1	1	1	1	2	1	1	1	2	1	1	1	1	1	2	1	1	1	1	1	1	1	1	1	1	1	1	1	2	2	1	2	1	3	1
25	FEMALE	BELGIUM	3	4	2	4	1	3	3	3	2	3	3	1	1	1	4	1	1	1	4	1	1	1	2	1	1	3	2	3	1	1	1	2	2	3	1	2	1	3	2	3	3	5	3	5	2	3	4
34	FEMALE	USA	2	1	1	1	1	1	2	1	2	2	1	1	1	1	1	1	1	1	1	1	2	1	1	1	1	2	1	1	1	1	2	2	1	1	1	1	1	1	2	1	3	3	1	4	1	3	2
53	MALE	BELGIUM	4	3	3	4	3	3	4	1	4	3	4	1	1	1	4	1	1	1	1	1	4	3	4	3	1	4	3	1	4	3	3	1	1	1	3	1	1	1	1	1	5	4	5	5	1	5	5
[truncated: 37 more columns]

## Sheet: Out Put PANAS Scale 
GENDER
		Frequency	Percent	Valid Percent	Cumulative Percent
Valid	FEMALE	137	52.0913	52.0913	52.0913
	MALE	125	47.5285	47.5285	99.6198
	OTHER	1	0.380228	0.380228	100
	Total	263	100	100
COUNTRY
		Frequency	Percent	Valid Percent	Cumulative Percent
Valid	ARGENTINA	1	0.380228	0.380228	0.380228
	AUSTRALIA	2	0.760456	0.760456	1.14068
	AUSTRIA	2	0.760456	0.760456	1.90114
	BELGIUM	59	22.4335	22.4335	24.3346
	BOLIVIA	1	0.380228	0.380228	24.7148
	BRASIL	3	1.14068	1.14068	25.8555
	BRAZIL	9	3.42205	3.42205	29.2776
	BULGARIA	1	0.380228	0.380228	29.6578
	CANADA	8	3.04183	3.04183	32.6996
	CHINE	1	0.380228	0.380228	33.0798
	DENMARK	4	1.52091	1.52091	34.6008
	ECUADOR	1	0.380228	0.380228	34.981
	ENGLAND	1	0.380228	0.380228	35.3612
	FANCE	1	0.380228	0.380228	35.7414
	FINLAND	2	0.760456	0.760456	36.5019
	FRANCE	20	7.60456	7.60456	44.1065
	FRANCE	1	0.380228	0.380228	44.4867
	GERMANY	18	6.84411	6.84411	51.3308
	GREECE	3	1.14068	1.14068	52.4715
	INDIA	1	0.380228	0.380228	52.8517
	INDONESIA	1	0.380228	0.380228	53.2319
	IRAN	2	0.760456	0.760456	53.9924
	IRELAND	2	0.760456	0.760456	54.7529
	ISRAEL	3	1.14068	1.14068	55.8935
	ITALY	15	5.70342	5.70342	61.597
	JAPAN	2	0.760456	0.760456	62.3574
	KENYA	1	0.380228	0.380228	62.7376
	LATVIA	1	0.380228	0.380228	63.1179
	LITHUANIA	1	0.380228	0.380228	63.4981
	LUXEMBOURG	2	0.760456	0.760456	64.2586
	MEXICO	2	0.760456	0.760456	65.019
	NETHERLANDS	7	2.6616	2.6616	67.6806
	NEW ZEALAND	2	0.760456	0.760456	68.4411
	NL	1	0.380228	0.380228	68.8213
	NORWAY	1	0.380228	0.380228	69.2015
	PHILIPPINES	1	0.380228	0.380228	69.5817
	POLAND	2	0.760456	0.760456	70.3422
	PORTUGAL	2	0.760456	0.760456	71.1027
	ROMANIA	2	0.760456	0.760456	71.8631
	SLOVAKIA	2	0.760456	0.760456	72.6236
	SOUTH AFRICA	1	0.380228	0.380228	73.0038
	SOUTH KOREA	1	0.380228	0.380228	73.384
	SPAIN	10	3.80228	3.80228	77.1863
	SWEDEN	3	1.14068	1.14068	78.327
	SWITZERLAND	4	1.52091	1.52091	79.8479
	TAIWAN	1	0.380228	0.380228	80.2281
	THE NETHERLANDS	1	0.380228	0.380228	80.6084
	TURKEY	2	0.760456	0.760456	81.3688
	UK	14	5.32319	5.32319	86.692
	US	1	0.380228	0.380228	87.0722		European
	USA	30	11.4068	11.4068	98.4791		Americans
	USA OF AMERICA	2	0.760456	0.760456	99.2395		Asians
	VENEZUELA	2	0.760456	0.760456	100		Oceanic
	Total	263	100	100			Africans
Statistics
AGE
N	Valid	263
	Missing	0
Mean		34.4487
Std. Deviation		12.7718
Minimum		17
Maximum		75
Table 2. Descriptive Statistic for positive and negative emotional score (pag 15 last version)
Report
	Positive Score				Negative Score
	Positive 1	Negative 1	Positive 2	Negative 2	Positive 1	Negative 1	Positive 2	Negative 2
Mean	25.0152	22.0646	28.038	19.1179	12.5323	15.9544	12.2738	23.924
Std. Deviation	7.42544	8.00951	8.24473	6.81023	3.38805	6.34548	3.30757	8.6608
Minimum	10	10	10	10	10	10	10	10
Maximum	48	44	48	46	31	37	35	46
General Linear Model
Within-Subjects Factors
Measure:	MEASURE_1
Song	Dependent Variable
1	positivescoresong1
2	positivescoresong2
3	positivescoresong3
4	positivescoresong4
Descriptive Statistics
	Mean	Std. Deviation	N
positivescoresong1	25.0152	7.42544	263
positivescoresong2	22.0646	8.00951	263
positivescoresong3	28.038	8.24473	263
positivescoresong4	19.1179	6.81023	263
Multivariate Testsa
Effect		Value	F	Hypothesis df	Error df	Sig.	Partial Eta Squared
Song	Pillai's Trace	0.452337	71,582b	3	260	8.85361e-34	0.452337
	Wilks' Lambda	0.547663	71,582b	3	260	8.85361e-34	0.452337
	Hotelling's Trace	0.825941	71,582b	3	260	8.85361e-34	0.452337
	Roy's Largest Root	0.825941	71,582b	3	260	8.85361e-34	0.452337
a. Design: Intercept Within Subjects Design: Song
b. Exact statistic
Mauchly's Test of Sphericitya
Measure:	MEASURE_1
Within Subjects Effect	Mauchly's W	Approx. Chi-Square	df	Sig.	Epsilonb
					Greenhouse-Geisser	Huynh-Feldt	Lower-bound
Song	0.937277	16.8888	5	0.00471593	0.955543	0.967228	0.333333
Tests the null hypothesis that the error covariance matrix of the orthonormalized transformed dependent variables is proportional to an identity matrix.
a. Design: Intercept Within Subjects Design: Song
b. May be used to adjust the degrees of freedom for the averaged tests of significance. Corrected tests are displayed in the Tests of Within-Subjects Effects table.
Tests of Within-Subjects Effects
Measure: Positive Scores	MEASURE_1
Source		Type III Sum of Squares	df	Mean Square	F	Sig.	Partial Eta Squared
Song	Sphericity Assumed	11608.5	3	3869.51	86.4586	2.37707e-48	0.248117
	Greenhouse-Geisser	11608.5	2.86663	4049.54	86.4586	2.50392e-46	0.248117
	Huynh-Feldt	11608.5	2.90169	4000.62	86.4586	7.36139e-47	0.248117
	Lower-bound	11608.5	1	11608.5	86.4586	5.83255e-18	0.248117
Error(Song)	Sphericity Assumed	35178	786	44.7557
	Greenhouse-Geisser	35178	751.057	46.8379
	Huynh-Feldt	35178	760.242	46.2721
	Lower-bound	35178	262	134.267
Tests of Within-Subjects Contrasts
Measure:	MEASURE_1
Source		Type III Sum of Squares	df	Mean Square	F	Sig.	Partial Eta Squared
Song	Linear	1805.84	1	1805.84	47.9087	3.42805e-11	0.15459
	Quadratic	2343.06	1	2343.06	58.8661	3.33124e-13	0.18346
	Cubic	7459.64	1	7459.64	131.4	6.3306e-25	0.334011
Error(Song)	Linear	9875.66	262	37.6934
	Quadratic	10428.4	262	39.8032
	Cubic	14873.9	262	56.7705
Tests of Between-Subjects Effects
Measure:	MEASURE_1
Transformed Variable:	Average
Source	Type III Sum of Squares	df	Mean Square	F	Sig.	Partial Eta Squared
Intercept	583885	1	583885	5875.43	1.87485e-181	0.957311
Error	26036.8	262	99.3773
Estimated Marginal Means
Estimates
Measure:	MEASURE_1
Song	Mean	Std. Error	95% Confidence Interval
			Lower Bound	Upper Bound
1	25.0152	0.457872	24.1136	25.9168
2	22.0646	0.493888	21.0921	23.0371
3	28.008	0.508392	27.037	29.0391
4	19.1179	0.419937	18.291	19.9448
Pairwise Comparisons
Measure:	MEASURE_1
(I) Song		Mean Difference (I-J)	Std. Error	Sig.b	95% Confidence Interval for Differenceb
					Lower Bound	Upper Bound
1	2	2,888*	0.563	3.62176e-07	1.83785	4.06329
	3	-2,948*	0.567	2.22711e-07	-4.14162	-1.90401
	4	5,921*	0.551	3.0682e-22	4.8069	6.98778
2	1	-2,888*	0.563	3.62176e-07	-4.06329	-1.83785
	3	-5,836*	0.627	5.37473e-18	-7.23677	-4.71
	4	3,033*	0.535	9.49992e-08	1.88984	4.0037
3	1	2,948*	0.567	2.22711e-07	1.90401	4.14162
	2	5,836*	0.627	5.37473e-18	4.71	7.23677		Positive Score
	4	8,869*	0.616	2.1086e-34	7.68509	10.1552		Music Track	Negativo 1	Positivo 2	Negativo 2
4	1	-5,921*	0.551	3.0682e-22	-6.98778	-4.8069		Positive 1	2,88*	2,95*	5,92*
	2	-3,033*	0.535	9.49992e-08	-4.0037	-1.88984		Negative 1	X	5,84*	3,03*
	3	-8,869*	0.616	2.1086e-34	-10.1552	-7.68509		Positive 2	X	X	8,87*
Based on estimated marginal means
*. The mean difference is significant at the ,05 level.
b. Adjustment for multiple comparisons: Least Significant Difference (equivalent to no adjustments).
Multivariate Tests
	Value	F	Hypothesis df	Error df	Sig.	Partial Eta Squared
Pillai's trace	0.452337	71,582a	3	260	8.85361e-34	0.452337
Wilks' lambda	0.547663	71,582a	3	260	8.85361e-34	0.452337
Hotelling's trace	0.825941	71,582a	3	260	8.85361e-34	0.452337
Roy's largest root	0.825941	71,582a	3	260	8.85361e-34	0.452337
Each F tests the multivariate effect of Song. These tests are based on the linearly independent pairwise comparisons among the estimated marginal means.
a. Exact statistic
Within-Subjects Factors
Measure:	MEASURE_1
Song	Dependent Variable
1	negativescoresong1
2	negativescoresong2
3	negativescoresong3
4	negativescoresong4
Descriptive Statistics
	Mean	Std. Deviation	N
negativescoresong1	12.5323	3.38805	263
negativescoresong2	15.9544	6.34548	263
negativescoresong3	12.2738	3.30757	263
negativescoresong4	23.924	8.6608	263
Multivariate Testsa
Effect		Value	F	Hypothesis df	Error df	Sig.	Partial Eta Squared
Song	Pillai's Trace	0.659743	168,042b	3	260	1.4329e-60	0.659743
	Wilks' Lambda	0.340257	168,042b	3	260	1.4329e-60	0.659743
	Hotelling's Trace	1.93895	168,042b	3	260	1.4329e-60	0.659743
	Roy's Largest Root	1.93895	168,042b	3	260	1.4329e-60	0.659743
a. Design: Intercept Within Subjects Design: Song
b. Exact statistic
Mauchly's Test of Sphericitya
Measure:	MEASURE_1
Within Subjects Effect	Mauchly's W	Approx. Chi-Square	df	Sig.	Epsilonb
					Greenhouse-Geisser	Huynh-Feldt	Lower-bound
Song	0.507282	176.949	5	2.41299e-36	0.706694	0.712613	0.333333
Tests the null hypothesis that the error covariance matrix of the orthonormalized transformed dependent variables is proportional to an identity matrix.
a. Design: Intercept Within Subjects Design: Song
b. May be used to adjust the degrees of freedom for the averaged tests of significance. Corrected tests are displayed in the Tests of Within-Subjects Effects table.
Tests of Within-Subjects Effects
Measure: Negative Scores	MEASURE_1
Source		Type III Sum of Squares	df	Mean Square	F	Sig.	Partial Eta Squared
Song	Sphericity Assumed	23297.5	3	7765.84	301.623	2.94153e-130	0.53515
	Greenhouse-Geisser	23297.5	2.12008	10989	301.623	5.58264e-93	0.53515
	Huynh-Feldt	23297.5	2.13784	10897.7	301.623	9.87003e-94	0.53515
	Lower-bound	23297.5	1	23297.5	301.623	1.75651e-45	0.53515
Error(Song)	Sphericity Assumed	20237	786	25.7468
	Greenhouse-Geisser	20237	555.461	36.4328
	Huynh-Feldt	20237	560.114	36.1302
	Lower-bound	20237	262	77.2404
Tests of Within-Subjects Contrasts
Measure:	MEASURE_1
Source		Type III Sum of Squares	df	Mean Square	F	Sig.	Partial Eta Squared
Song	Linear	12228.2	1	12228.2	413.73	7.85397e-56	0.612271
	Quadratic	4451.42	1	4451.42	274.412	1.17362e-42	0.51157
	Cubic	6617.87	1	6617.87	210.34	2.16819e-35	0.445315
Error(Song)	Linear	7743.69	262	29.5561
	Quadratic	4250.08	262	16.2217
	Cubic	8243.23	262	31.4627
Tests of Between-Subjects Effects
Measure:	MEASURE_1
Transformed Variable:	Average
Source	Type III Sum of Squares	df	Mean Square	F	Sig.	Partial Eta Squared
Intercept	275103	1	275103	4550.68	1.28575e-167	0.945561
Error	15838.7	262	60.4531
Estimated Marginal Means
Song
Estimates
Measure:	MEASURE_1
Song	Mean	Std. Error	95% Confidence Interval
			Lower Bound	Upper Bound
1	12.5323	0.208916	12.121	12.9437
2	15.9544	0.391279	15.1839	16.7248
3	12.2738	0.203954	11.8722	12.6754
4	23.924	0.534048	22.8724	24.9755
Pairwise Comparisons
Measure:	MEASURE_1
(I) Song		Mean Difference (I-J)	Std. Error	Sig.b	95% Confidence Interval for Differenceb
					Lower Bound	Upper Bound
1	2	-3,462*	0.405	1.64575e-15	-4.21648	-2.62763
	3	0.232	0.264	0.326377	-0.259213	0.776323
	4	-11,413*	0.537	2.76148e-58	-12.4568	-10.3264
2	1	3,462*	0.405	1.64575e-15	2.62763	4.21648
	3	3,694*	0.417	1.00836e-16	2.86545	4.49576
	4	-7,952*	0.437	3.79339e-48	-8.8353	-7.10386
3	1	-0.232	0.264	0.326377	-0.776323	0.259213
	2	-3,694*	0.417	1.00836e-16	-4.49576	-2.86545		Negative Score
	4	-11,646*	0.532	8.26511e-61	-12.7023	-10.598		Music Track	Negativo 1	Positivo 2	Negativo 2
4	1	11,413*	0.537	2.76148e-58	10.3264	12.4568		Positive 1	3,46*	0.23	11,41*
	2	7,952*	0.437	3.79339e-48	7.10386	8.8353		Negative 1	X	3,69*	7,95*
	3	11,646*	0.532	8.26511e-61	10.598	12.7023		Positive 2	X	X	11,65*
Based on estimated marginal means
*. The mean difference is significant at the ,05 level.
b. Adjustment for multiple comparisons: Least Significant Difference (equivalent to no adjustments).
Multivariate Tests
	Value	F	Hypothesis df	Error df	Sig.	Partial Eta Squared
Pillai's trace	0.659743	168,042a	3	260	1.4329e-60	0.659743
Wilks' lambda	0.340257	168,042a	3	260	1.4329e-60	0.659743
Hotelling's trace	1.93895	168,042a	3	260	1.4329e-60	0.659743
Roy's largest root	1.93895	168,042a	3	260	1.4329e-60	0.659743
Each F tests the multivariate effect of Song. These tests are based on the linearly independent pairwise comparisons among the estimated marginal means.
a. Exact statistic
GENDER
		Frequency	Percent	Valid Percent	Cumulative Percent
Valid		1	0.380228	0.380228	0.380228
	FEMALE	137	52.0913	52.0913	52.4715
	MALE	125	47.5285	47.5285	100
	Total	263	100	100
Within-Subjects Factors
Measure:	MEASURE_1
Song	Dependent Variable
1	Rank_Song1
2	Rank_Song2
3	Rank_Song3
4	Rank_Song4
Descriptive Statistics
	Mean	Std. Deviation	N
Rank_Song1	1.87833	0.961286	263
Rank_Song2	2.52471	0.98769	263
Rank_Song3	2.34981	1.0408	263
Rank_Song4	3.24715	1.03181	263
Multivariate Testsa
Effect		Value	F	Hypothesis df	Error df	Sig.	Partial Eta Squared
Song	Pillai's Trace	0.405522	59,120b	3	260	3.5868e-29	0.405522
	Wilks' Lambda	0.594478	59,120b	3	260	3.5868e-29	0.405522
	Hotelling's Trace	0.682149	59,120b	3	260	3.5868e-29	0.405522
	Roy's Largest Root	0.682149	59,120b	3	260	3.5868e-29	0.405522
a. Design: Intercept Within Subjects Design: Song
b. Exact statistic
Mauchly's Test of Sphericitya
Measure:	MEASURE_1
Within Subjects Effect	Mauchly's W	Approx. Chi-Square	df	Sig.	Epsilonb
					Greenhouse-Geisser	Huynh-Feldt	Lower-bound
Song	0.9662	8.96467	5	0.110484	0.976448	0.988684	0.333333
Tests the null hypothesis that the error covariance matrix of the orthonormalized transformed dependent variables is proportional to an identity matrix.
a. Design: Intercept Within Subjects Design: Song
b. May be used to adjust the degrees of freedom for the averaged tests of significance. Corrected tests are displayed in the Tests of Within-Subjects Effects table.
Tests of Within-Subjects Effects
Measure:	MEASURE_1
Source		Type III Sum of Squares	df	Mean Square	F	Sig.	Partial Eta Squared
Song	Sphericity Assumed	254.551	3	84.8504	62.8908	1.8853e-36	0.193575
	Greenhouse-Geisser	254.551	2.92934	86.8971	62.8908	1.17254e-35	0.193575
	Huynh-Feldt	254.551	2.96605	85.8216	62.8908	4.53657e-36	0.193575
	Lower-bound	254.551	1	254.551	62.8908	6.34187e-14	0.193575
Error(Song)	Sphericity Assumed	1060.45	786	1.34917
	Greenhouse-Geisser	1060.45	767.488	1.38171
	Huynh-Feldt	1060.45	777.106	1.36461
	Lower-bound	1060.45	262	4.04751
Tests of Within-Subjects Contrasts
Measure:	MEASURE_1
Source		Type III Sum of Squares	df	Mean Square	F	Sig.	Partial Eta Squared
Song	Linear	203.262	1	203.262	158.808	8.7847e-29	0.377389
	Quadratic	4.14068	1	4.14068	3.42379	0.0653891	0.0128993
	Cubic	47.149	1	47.149	30.2585	8.98617e-08	0.103533
Error(Song)	Linear	335.338	262	1.27992
	Quadratic	316.859	262	1.20939
	Cubic	408.251	262	1.55821
Tests of Between-Subjects Effects
Measure:	MEASURE_1
Transformed Variable:	Average
Source	Type III Sum of Squares	df	Mean Square	F	Sig.	Partial Eta Squared
Intercept	6575	1	6575	6.06104e+19	0	1
Error	2.84217e-14	262	1.0848e-16
Estimates
Measure:	MEASURE_1
Song	Mean	Std. Error	95% Confidence Interval
			Lower Bound	Upper Bound
1	1.87833	0.0592754	1.76161	1.99504
2	2.52471	0.0609036	2.40479	2.64464
3	2.34981	0.0641787	2.22344	2.47618
4	3.24715	0.0636243	3.12187	3.37243
Pairwise Comparisons
Measure:	MEASURE_1
(I) Song		Mean Difference (I-J)	Std. Error	Sig.b	95% Confidence Interval for Differenceb
					Lower Bound	Upper Bound
1	2	-,646*	0.0987627	3.11827e-10	-0.840857	-0.451918
	3	-,471*	0.095735	1.49637e-06	-0.659991	-0.282975
	4	-1,369*	0.102591	2.44665e-31	-1.57083	-1.16681
2	1	,646*	0.0987627	3.11827e-10	0.451918	0.840857
	3	0.174905	0.105156	0.0974515	-0.0321544	0.381964
	4	-,722*	0.09703	1.39493e-12	-0.913491	-0.531376
3	1	,471*	0.095735	1.49637e-06	0.282975	0.659991
	2	-0.174905	0.105156	0.0974515	-0.381964	0.0321544
	4	-,897*	0.1079	4.99444e-15	-1.1098	-0.684877
4	1	1,369*	0.102591	2.44665e-31	1.16681	1.57083
	2	,722*	0.09703	1.39493e-12	0.531376	0.913491
	3	,897*	0.1079	4.99444e-15	0.684877	1.1098
Based on estimated marginal means
*. The mean difference is significant at the ,05 level.
b. Adjustment for multiple comparisons: Least Significant Difference (equivalent to no adjustments).
Multivariate Tests
	Value	F	Hypothesis df	Error df	Sig.	Partial Eta Squared
Pillai's trace	0.405522	59,120a	3	260	3.5868e-29	0.405522
Wilks' lambda	0.594478	59,120a	3	260	3.5868e-29	0.405522
Hotelling's trace	0.682149	59,120a	3	260	3.5868e-29	0.405522
Roy's largest root	0.682149	59,120a	3	260	3.5868e-29	0.405522
Each F tests the multivariate effect of Song. These tests are based on the linearly independent pairwise comparisons among the estimated marginal means.
a. Exact statistic
Variable	Affect Score	Type III sum of squares	df	Mean	F	P	Partial Eta Square	Observed Power
				Square
Songs	Positive	11372.8	3	3790.93	86.96	0	0.25	1
	Negative	23190.7	3	7730.22	303.5	0	0.54	1
Songs*Gender	Positive	971.07	3	323.69	7.43	0	0.03	0.99
	Negative	210.62	3	70.21	2.76	0.04	0.01	0.67
Error (Songs)	Positive	34003.1	780	43.59
	Negative	19866.5	780	25.47
Gender	Positive	53.66	1	53.66	0.54	0.46	0	0.11
	Negative	10.13	1	10.13	0.17	0.68	0	0.07
Error	Positive	25847.7	260	99.41
	Negative	15741	260	60.54
Affect	Song	Gender	Mean	SD
Positive	1	Female	25.07	7.3
		Male	25.05	7.56
	2	Female	20.9	7.91
		Male	23.44	7.89
	3	Female	29.24	8.21
		Male	26.77	8.13
	4	Female	18.26	6.04
		Male	20.02	7.49
Negative	1	Female	12.42	2.94
		Male	12.62	3.82
	2	Female	15.8	6.13
		Male	16.17	6.59
	3	Female	12.09	2.64
		Male	12.49	3.92
	4	Female	24.81	8.9
		Male	23.06	8.27
Song	Rank	Gender		Total
		FEMALE	MALE
Positive 1	1	0.489	0.4	0.447
	2	0.343	0.288	0.317
	3	0.124	0.192	0.156
	4	0.044	0.12	0.08
Negative 1	1	0.146	0.272	0.206
	2	0.226	0.216	0.221
	3	0.438	0.392	0.416
	4	0.19	0.12	0.156
Positive 2	1	0.285	0.216	0.252
	2	0.321	0.32	0.321
	3	0.226	0.28	0.252
	4	0.168	0.184	0.176
Negative 2	1	0.08	0.112	0.095
	2	0.109	0.176	0.141
	3	0.212	0.136	0.176
	4	0.599	0.576	0.588

## Sheet: Data Set Exp 1 - Zinnebir N221
				Silence Condition						Song Condition
Condición	Age	Gender	Country	Liking_Silence	Sweet_Silence	Bitter_Silence	Sour_Silence	Strong_Silence	Body_Silence	Liking_with_Music	Sweet_Music	Bitter_Music	Sour_Music	Strong_Music	Body_Music	Liking_Song	Match_Beer&Flavour	Experience_Preference	Beer_Preference	Willingness_to_pay
Silence_HappySong	62	Male	BELGIUM	5	2	5	3	5	4	6	4	4	3	5	5	4	6	Beer with music	Beer TK	YES
Silence_HappySong	30	Male	CYPRUS	4	2	4	4	4	4	4	2	4	4	5	5	6	6	Beer with music	Beer TK	YES
Silence_HappySong	34	Female	BELGIUM	4	1	5	4	5	4	1	2	5	3	1	4	1	4	Beer without music	Beer WD	NO
Silence_HappySong	43	Male	UK	5	2	5	3	3	3	3	2	4	3	3	3	4	4	Beer without music	Beer WD	NO
Silence_HappySong	56	Male	BELGIUM	5	3	6	5	4	4	4	3	2	5	2	5	5	6	Beer with music	Beer WD	NO
Silence_HappySong	34	Female	SPAIN	7	7	4	4	1	4	7	4	4	4	4	4	7	7	Beer without music	No preference	YES
Silence_HappySong	21	Male	AUSTRALIA	2	1	4	4	5	3	2	3	6	6	5	4	6	1	Beer with music	No preference	YES
Silence_HappySong	29	Female	BELGIUM	2	1	6	3	2	3	2	1	6	3	3	3	5	1	No preference	No preference	NO
Silence_HappySong	50	Female	BELGIUM	6	2	5	5	4	3	6	2	5	5	3	3	7	6	Beer with music	No preference	NO
Silence_HappySong	26	Male	USA	4	1	4	1	3	3	4	1	4	2	3	4	5	3	Beer with music	No preference	YES
Silence_HappySong	25	Male	ITALY	6	2	6	4	3	4	6	2	6	4	3	4	7	5	Beer without music	No preference	NO
Silence_HappySong	21	Male	IRELAND	5	5	3	4	5	5	5	4	5	6	7	5	5	3	Beer without music	Beer WD	NO
Silence_HappySong	20	Female	UK	3	2	5	2	4	3	4	4	3	2	4	2	7	2	Beer with music	Beer TK	NO
Silence_HappySong	67	Male	GERMANY	7	3	6	6	4	3	7	3	6	6	5	4	6	4	Beer with music	No preference	YES
Silence_HappySong	19	Female	BELGIUM	6	3	2	6	2	4	6	3	3	5	2	5	7	5	Beer with music	No preference	NO
Silence_HappySong	68	Male	BELGIUM	5	2	5	5	4	6	5	2	4	4	5	4	5	5	No preference	No preference	NO
Silence_HappySong	29	Female	IRELAND	6	6	2	2	3	5	4	3	6	6	6	6	6	4	Beer with music	Beer WD	YES
Silence_HappySong	30	Male	BELGIUM	6	4	5	4	3	4	4	3	4	3	3	4	6	2	Beer without music	Beer WD	NO
Silence_HappySong	40	Male	BELGIUM	6	3	5	4	5	5	2	3	6	6	5	3	5	2	Beer without music	Beer WD	YES
Silence_HappySong	33	Male	UK	5	3	6	2	6	7	6	5	4	1	4	4	5	6	Beer with music	Beer TK	YES
Silence_HappySong	54	Female	SPAIN	6	4	4	3	3	5	7	6	1	2	1	3	7	6	Beer with music	Beer TK	YES
Silence_HappySong	19	Female	FRANCE	6	4	2	5	4	3	5	2	6	5	4	5	7	5	Beer with music	Beer TK	YES
Silence_HappySong	24	Female	BELGIUM	6	5	4	4	5	5	5	4	3	5	4	4	7	5	Beer without music	Beer WD	NO
Silence_HappySong	58	Male	FRANCE	4	2	5	3	2	2	4	2	2	2	2	2	4	3	Beer with music	No preference	NO
Silence_HappySong	24	Male	GERMANY	6	2	5	4	4	2	7	4	5	3	5	4	6	5	Beer with music	No preference	NO
Silence_HappySong	34	Female	BELGIUM	7	1	3	1	5	5	7	1	2	1	4	4	1	1	Beer without music	Beer WD	NO
Silence_HappySong	35	Male	FRANCE	6	5	2	3	4	4	4	2	5	6	5	5	4	2	Beer without music	Beer WD	NO
Silence_HappySong	27	Female	FRANCE	6	2	7	5	5	1	7	3	6	2	3	6	7	5	Beer with music	Beer TK	YES
Silence_HappySong	22	Female	CANADA	4	2	5	4	4	5	4	2	5	4	4	5	6	2	Beer with music	No preference	YES
Silence_HappySong	37	Other	FRANCE	1	1	7	7	7	4	1	1	7	7	7	4	7	1	No preference	No preference	NO
Silence_HappySong	22	Female	ITALY	7	5	3	4	3	3	7	5	2	3	4	5	4	6	Beer with music	Beer WD	YES
Silence_HappySong	21	Female	GREECE	2	2	6	5	5	6	2	3	5	5	5	5	6	2	Beer with music	Beer TK	YES
Silence_HappySong	34	Female	BELGIUM	2	2	6	4	5	4	2	2	4	5	4	4	5	4	Beer with music	Beer WD	NO
Silence_HappySong	24	Female	BELGIUM	5	2	5	3	5	4	4	2	5	4	3	4	4	3	Beer with music	Beer WD	NO
Silence_HappySong	25	Female	ITALY	1	1	4	7	4	5	6	6	4	2	3	3	6	5	Beer with music	Beer TK	YES
Silence_HappySong	21	Male	BELGIUM	6	2	7	4	5	2	7	4	5	1	5	4	7	6	Beer with music	Beer WD	YES
Silence_HappySong	32	Female	SWITZERLAND	5	4	5	4	5	3	4	4	5	5	5	4	6	3	Beer without music	Beer WD	NO
Silence_HappySong	25	Female	BELGIUM	2	2	5	1	6	7	1	2	4	3	5	6	6	1	No preference	Beer WD	NO
Silence_HappySong	21	Female	SINGAPORE	6	5	5	4	5	2	6	6	6	4	5	2	7	5	Beer with music	No preference	YES
Silence_HappySong	35	Male	BELGIUM	7	1	5	2	2	2	7	2	5	2	4	3	4	3	No preference	Beer WD	YES
Silence_HappySong	23	Male	SINGAPORE	7	5	6	3	2	1	6	3	6	1	5	4	5	4	Beer with music	Beer WD	NO
Silence_HappySong	63	Male	BELGIUM	4	2	7	2	6	2	6	2	6	4	6	4	4	4	No preference	Beer WD	NO
Silence_HappySong	53	Female	FRANCE	4	2	5	3	4	4	4	4	4	4	4	4	5	2	Beer with music	No preference	YES
Silence_HappySong	63	Male	BELGIUM	5	1	6	4	6	6	5	1	6	5	6	6	7	1	No preference	Beer TK	NO
Silence_HappySong	31	Male	USA	5	1	5	3	5	3	5	2	5	2	3	1	6	3	Beer with music	No preference	NO
Silence_HappySong	23	Female	FRANCE	1	2	6	2	2	4	3	2	6	2	1	4	6	4	Beer with music	Beer TK	YES
Silence_HappySong	22	Female	BELGIUM	5	5	4	6	5	6	1	1	7	7	4	4	6	1	Beer without music	Beer TK	YES
Silence_HappySong	23	Male	FRANCE	6	2	5	3	5	5	5	2	5	2	4	5	4	2	Beer without music	Beer WD	NO
Silence_HappySong	63	Male	BELGIUM	6	5	4	4	4	4	5	4	4	3	4	5	5	4	Beer without music	Beer WD	NO
Silence_HappySong	31	Female	UK	4	3	7	1	5	4	6	4	4	2	4	5	5	4	Beer with music	Beer TK	YES
Silence_HappySong	25	Male	BELGIUM	3	3	5	4	6	4	3	3	5	4	5	4	4	2	Beer without music	No preference	YES
Silence_HappySong	32	Female	BELGIUM	3	2	6	4	2	3	4	3	5	4	3	5	7	3	Beer with music	Beer TK	NO
Silence_HappySong	34	Male	SPAIN	6	3	5	4	4	3	6	4	5	4	4	5	7	6	Beer with music	Beer TK	YES
Silence_HappySong	20	Female	BELGIUM	6	2	5	1	3	4	7	6	6	5	2	6	4	5	Beer with music	Beer TK	NO
Silence_HappySong	52	Female	BELGIUM	1	1	6	3	4	4	1	1	7	4	5	4	7	1	Beer with music	No preference	YES
Silence_HappySong	40	Female	BELGIUM	2	3	3	3	3	3	3	3	6	5	5	4	4	5	Beer with music	Beer TK	YES
Silence_HappySong	41	Female	BELGIUM	5	3	2	3	4	5	1	2	6	2	4	4	7	2	Beer without music	Beer WD	NO
Silence_HappySong	32	Male	NORWAY	3	4	3	5	4	3	5	3	5	5	5	5	5	4	Beer with music	Beer TK	NO
Silence_HappySong	38	Female	SPAIN	7	7	1	1	1	4	7	3	5	1	2	4	7	7	Beer with music	Beer WD	YES
Silence_HappySong	64	Male	BELGIUM	5	2	4	2	3	4	5	2	4	2	3	4	4	4	No preference	No preference	NO
Silence_HappySong	25	Female	USA	7	4	1	1	4	2	7	4	1	1	4	2	7	6	Beer with music	No preference	YES
Silence_HappySong	26	Female	UK	5	3	4	4	3	3	3	4	6	5	5	5	5	2	Beer without music	Beer WD	NO
Silence_HappySong	60	Female	UK	4	3	6	1	5	5	5	4	5	1	6	5	6	4	No preference	No preference	NO
Silence_HappySong	28	Female	UK	4	2	5	1	5	4	4	3	5	1	5	4	6	3	Beer with music	No preference	YES
Silence_HappySong	22	Male	UK	5	4	4	4	3	4	5	5	3	3	3	4	5	4	Beer with music	Beer TK	NO
Silence_HappySong	22	Female	MEXICO	3	2	7	5	7	6	6	4	5	4	4	6	7	7	Beer with music	Beer TK	YES
Silence_HappySong	19	Male	BRAZIL	6	6	4	4	3	2	6	2	6	2	4	5	5	6	Beer with music	No preference	YES
Silence_HappySong	58	Male	BELGIUM	1	1	4	7	4	7	1	1	7	7	4	4	1	1	No preference	No preference	NO
Silence_HappySong	25	Male	IRELAND	4	4	4	4	1	4	7	5	1	4	1	4	4	4	Beer with music	No preference	YES
Silence_HappySong	67	Female	BELGIUM	2	4	4	1	2	2	7	1	7	1	4	2	6	1	Beer without music	Beer TK	NO
Silence_HappySong	24	Male	BELGIUM	5	3	5	5	5	4	6	2	6	5	5	4	6	5	Beer with music	Beer TK	NO
Silence_HappySong	43	Female	SPAIN	4	3	5	6	5	4	4	2	3	5	5	5	6	5	Beer with music	No preference	NO
Silence_HappySong	23	Female	UK	6	2	5	3	7	5	5	1	5	2	7	6	4	3	Beer with music	Beer WD	YES
Silence_HappySong	32	Male	ITALY	4	1	5	5	5	2	5	1	6	4	4	4	7	2	Beer with music	Beer TK	YES
Silence_HappySong	30	Female	UK	5	5	3	3	4	4	1	2	6	5	2	2	6	4	Beer with music	Beer WD	NO
Silence_HappySong	29	Male	CHINA	3	3	6	5	5	2	5	3	6	2	5	7	6	3	Beer with music	Beer TK	YES
Silence_HappySong	58	Male	FRANCE	5	2	4	3	4	4	3	2	6	2	4	2	4	4	Beer with music	Beer WD	NO
Silence_HappySong	28	Male	UK	4	3	5	5	5	5	6	6	2	2	5	3	7	6	Beer without music	Beer TK	YES
Silence_HappySong	32	Male	AUSTRALIA	5	2	3	4	5	2	4	2	5	4	5	3	5	3	Beer with music	Beer WD	YES
Silence_HappySong	23	Male	FRANCE	3	5	2	2	1	4	5	3	5	4	3	4	7	3	Beer with music	Beer TK	YES
Silence_HappySong	25	Female	USA	4	3	3	2	2	1	1	2	7	4	4	3	6	2	No preference	Beer WD	YES
Silence_HappySong	30	Male	ITALY	5	2	5	3	5	5	5	2	4	3	5	4	2	4	No preference	No preference	NO
Silence_HappySong	41	Female	BELGIUM	2	1	6	2	6	6	3	2	7	3	6	6	4	5	Beer with music	No preference	NO
Silence_HappySong	22	Male	FRANCE	5	5	4	3	5	4	6	6	3	2	4	4	3	2	Beer with music	No preference	YES
Silence_HappySong	28	Male	BELGIUM	3	3	5	2	2	4	4	2	2	1	2	4	5	3	No preference	No preference	NO
Silence_HappySong	27	Male	UK	3	4	2	2	2	2	5	3	4	5	4	4	6	1	Beer with music	Beer TK	YES
Silence_HappySong	20	Female	FRANCE	6	2	4	4	4	4	6	2	6	1	4	3	6	2	Beer with music	Beer WD	NO
Silence_HappySong	23	Male	FRANCE	4	3	4	5	5	3	5	2	3	6	4	5	6	3	Beer with music	Beer TK	YES
Silence_HappySong	31	Male	FRANCE	4	5	5	6	5	5	5	2	6	4	4	3	6	5	Beer with music	Beer TK	YES
Silence_HappySong	26	Male	BELGIUM	4	2	6	4	3	3	6	3	5	3	4	4	7	3	Beer with music	Beer TK	YES
Silence_HappySong	30	Female	RUSSIA	7	5	5	3	6	5	7	4	4	2	5	5	7	7	Beer with music	No preference	YES
Silence_HappySong	41	Female	USA	3	3	5	3	5	4	2	1	7	5	7	2	4	2	Beer without music	Beer WD	YES
Silence_HappySong	25	Male	FRANCE	4	5	5	4	5	3	5	4	6	5	4	4	6	3	Beer with music	Beer WD	YES
Silence_HappySong	23	Female	FRANCE	3	2	7	6	6	6	4	2	6	5	5	5	6	5	Beer with music	Beer TK	YES
Silence_HappySong	17	Female	FRANCE	2	4	6	5	6	4	5	4	4	4	3	4	6	2	Beer with music	Beer TK	YES
Silence_HappySong	30	Female	BELGIUM	4	5	7	3	5	6	7	3	6	6	5	5	7	2	Beer with music	No preference	YES
Silence_HappySong	30	Female	POLAND	5	2	3	2	5	5	6	2	4	3	6	6	7	5	Beer with music	Beer TK	NO
Silence_HappySong	18	Male	UK	2	1	7	4	4	4	3	2	6	3	5	4	5	2	Beer with music	Beer TK	NO
Silence_HappySong	23	Female	SOUTH AFRICA	3	4	5	6	2	3	5	6	2	3	6	5	7	7	Beer with music	Beer TK	YES
Silence_HappySong	27	Male	SPAIN	6	5	5	4	5	3	7	4	4	6	4	5	7	6	Beer without music	Beer TK	YES
Silence_HappySong	24	Female	BELGIUM	1	1	4	5	5	4	3	1	4	5	5	4	4	2	Beer with music	Beer TK	NO
Silence_HappySong	19	Male	FRANCE	5	4	5	5	5	5	6	3	4	6	7	6	5	4	Beer with music	Beer TK	NO
Silence_HappySong	19	Male	IRELAND	2	2	5	4	5	4	3	2	5	4	5	5	4	1	Beer with music	No preference	YES
Silence_HappySong	19	Female	IRELAND	4	3	3	3	4	5	3	2	3	3	4	5	6	3	Beer with music	Beer TK	YES
Silence_HappySong	34	Male	BELGIUM	2	2	5	4	4	4	2	2	6	3	4	3	6	6	Beer with music	No preference	YES
Silence_SadSong	53	Male	BELGIUM	4	3	3	4	3	5	2	3	6	2	5	3	5	3	Beer with music	Beer WD	NO
Silence_SadSong	35	Male	BELGIUM	3	2	6	4	4	1	4	1	3	4	2	1	3	5	Beer with music	Beer TK	YES
Silence_SadSong	56	Female	BELGIUM	5	3	5	6	4	3	4	3	6	6	4	3	6	5	Beer with music	No preference	YES
Silence_SadSong	68	Male	CHILE	6	3	5	5	5	4	4	5	5	3	5	4	5	5	Beer with music	Beer WD	NO
Silence_SadSong	27	Male	USA	5	2	5	1	4	4	3	1	5	1	3	3	5	4	Beer with music	Beer WD	YES
Silence_SadSong	22	Male	BRAZIL	5	3	5	4	5	5	5	5	5	4	4	4	4	5	Beer with music	Beer TK	YES
Silence_SadSong	21	Male	BRAZIL	6	2	6	1	5	5	3	2	4	6	3	4	2	5	Beer with music	Beer WD	YES
Silence_SadSong	25	Female	MEXICO	5	4	5	1	4	5	5	2	7	1	5	4	3	5	Beer with music	Beer WD	YES
Silence_SadSong	25	Male	NORWAY	5	2	4	2	4	4	5	4	4	4	3	4	1	2	Beer without music	Beer WD	YES
Silence_SadSong	24	Male	SWEDEN	4	3	4	2	3	3	3	3	5	2	4	5	2	5	Beer with music	Beer WD	NO
Silence_SadSong	24	Male	IRELAND	3	2	4	4	2	2	3	2	4	2	2	2	4	3	Beer with music	No preference	YES
Silence_SadSong	31	Male	BELGIUM	6	2	6	1	4	6	4	1	7	1	3	6	5	7	Beer without music	Beer WD	NO
Silence_SadSong	30	Female	BELGIUM	3	4	5	2	6	3	3	3	6	2	6	3	3	5	Beer with music	No preference	YES
Silence_SadSong	49	Female	FRANCE	4	3	4	3	4	3	1	1	5	5	5	2	2	5	Beer without music	Beer WD	YES
Silence_SadSong	51	Male	FRANCE	2	1	7	6	4	2	5	1	4	4	5	5	6	1	Beer with music	Beer TK	NO
Silence_SadSong	20	Male	BELGIUM	4	3	4	4	2	3	3	2	5	4	4	3	2	2	Beer without music	Beer TK	NO
Silence_SadSong	64	Female	SWITZERLAND	3	2	5	3	5	3	3	2	6	3	5	3	4	4	Beer without music	No preference	NO
Silence_SadSong	30	Male	BELGIUM	5	3	2	1	5	4	3	2	5	5	4	3	4	6	Beer with music	Beer WD	YES
Silence_SadSong	23	Male	UK	3	2	6	2	3	2	2	3	6	5	3	3	3	5	Beer without music	Beer WD	NO
Silence_SadSong	31	Male	ITALY	6	3	2	4	5	5	3	2	5	6	6	5	2	4	Beer without music	Beer TK	NO
Silence_SadSong	26	Male	BELGIUM	3	3	4	4	5	5	5	3	3	5	4	4	6	3	Beer with music	Beer TK	YES
Silence_SadSong	42	Male	BELGIUM	4	3	3	3	5	6	4	5	2	2	2	4	4	2	Beer without music	Beer WD	NO
Silence_SadSong	24	Female	BELGIUM	6	2	6	5	4	4	6	4	5	3	4	5	4	5	Beer with music	No preference	YES
Silence_SadSong	53	Female	FRANCE	3	4	6	4	2	2	3	4	6	4	3	2	1	4	Beer without music	No preference	YES
Silence_SadSong	25	Female	ITALY	3	4	3	3	5	5	2	2	4	4	5	4	6	5	Beer with music	Beer WD	NO
Silence_SadSong	24	Male	INDIA	4	2	3	3	4	4	4	4	2	2	3	3	3	3	No preference	Beer TK	NO
Silence_SadSong	33	Male	FRANCE	5	1	6	3	5	4	4	2	5	4	5	3	4	2	Beer without music	Beer WD	NO
Silence_SadSong	27	Male	UK	6	1	5	3	4	4	5	1	5	3	4	4	1	1	Beer without music	No preference	NO
Silence_SadSong	21	Male	AUSTRALIA	2	1	6	1	4	5	2	1	5	1	3	4	2	5	Beer with music	No preference	NO
Silence_SadSong	25	Male	UK	5	3	5	4	4	5	4	3	5	4	4	5	3	5	Beer without music	Beer WD	NO
Silence_SadSong	29	Male	BELGIUM	4	1	6	4	3	2	5	1	6	3	2	3	6	5	Beer with music	Beer TK	YES
Silence_SadSong	20	Female	CANADA	5	3	6	4	5	3	6	6	3	6	2	3	1	1	Beer without music	Beer TK	YES
Silence_SadSong	38	Female	HUNGARY	5	1	5	1	5	5	5	2	5	2	4	4	3	3	Beer without music	Beer WD	NO
Silence_SadSong	26	Male	BELGIUM	6	2	5	4	2	4	6	2	5	4	2	4	4	1	Beer with music	No preference	YES
Silence_SadSong	21	Female	UK	4	1	3	5	3	2	2	1	4	6	5	2	1	3	Beer without music	Beer WD	NO
Silence_SadSong	56	Male	FRANCE	6	4	5	4	4	4	4	3	6	4	4	4	2	2	No preference	Beer WD	NO
Silence_SadSong	24	Female	FRANCE	6	2	5	4	2	3	3	2	4	5	2	1	7	1	Beer without music	Beer WD	NO
Silence_SadSong	30	Female	BELGIUM	3	1	6	6	4	4	4	1	6	6	4	3	4	1	Beer without music	Beer TK	NO
Silence_SadSong	29	Female	SPAIN	5	1	3	3	4	5	5	4	3	4	5	4	1	4	Beer without music	Beer TK	NO
Silence_SadSong	27	Male	AUSTRALIA	6	4	4	3	4	5	4	2	4	2	6	5	2	4	Beer without music	Beer WD	NO
Silence_SadSong	51	Male	BELGIUM	6	4	5	5	4	3	5	4	4	5	5	3	4	4	No preference	Beer WD	NO
Silence_SadSong	25	Male	NETHERLANDS	5	2	6	6	4	5	3	2	6	7	3	4	1	6	No preference	Beer WD	YES
Silence_SadSong	28	Male	SPAIN	5	2	4	3	4	4	4	4	1	1	3	2	2	1	No preference	Beer WD	YES
Silence_SadSong	52	Male	BELGIUM	1	1	7	1	4	3	1	1	3	1	4	3	2	1	Beer with music	Beer TK	NO
Silence_SadSong	35	Male	UAE	5	1	4	1	3	4	4	1	4	1	3	3	1	4	Beer without music	Beer WD	YES
Silence_SadSong	47	Female	FRANCE	1	1	6	4	3	4	1	1	7	7	6	4	1	1	No preference	No preference	NO
Silence_SadSong	18	Male	FRANCE	3	4	6	4	5	4	5	3	4	4	5	5	5	5	Beer with music	Beer WD	YES
Silence_SadSong	21	Male	GERMANY	2	3	5	4	3	6	2	3	5	4	3	6	4	5	Beer without music	No preference	NO
Silence_SadSong	28	Female	USA	4	2	5	3	3	2	5	2	5	3	3	2	1	2	Beer without music	No preference	YES
Silence_SadSong	31	Female	BELGIUM	6	2	4	4	4	2	5	2	4	4	4	2	4	4	Beer without music	Beer WD	NO
Silence_SadSong	59	Male	UK	5	3	4	3	4	3	5	2	5	2	6	6	2	4	Beer with music	No preference	NO
Silence_SadSong	24	Female	FRANCE	5	3	5	5	4	5	4	3	5	5	5	5	4	5	Beer with music	Beer WD	YES
Silence_SadSong	62	Female	BELGIUM	1	1	6	4	5	1	1	1	7	7	6	1	4	4	Beer with music	No preference	NO
Silence_SadSong	19	Male	FRANCE	6	2	5	3	5	3	6	2	5	2	5	3	4	5	No preference	No preference	NO
Silence_SadSong	23	Female	BELGIUM	1	1	6	4	6	5	4	4	3	3	4	3	3	4	No preference	Beer TK	NO
Silence_SadSong	28	Female	GERMANY	3	3	6	4	4	5	4	3	5	3	5	5	3	5	Beer without music	No preference	NO
Silence_SadSong	32	Female	UK	3	2	5	3	4	2	3	2	5	3	3	3	4	4	No preference	No preference	NO
Silence_SadSong	31	Female	SPAIN	6	1	5	4	5	5	6	1	6	4	5	5	4	2	Beer with music	Beer TK	YES
Silence_SadSong	30	Female	CYPRUS	5	1	6	2	5	5	6	4	5	2	3	4	5	4	Beer with music	Beer TK	YES
Silence_SadSong	36	Male	BELGIUM	5	4	4	3	4	5	6	3	5	4	4	4	2	3	Beer without music	No preference	NO
Silence_SadSong	49	Female	UK	1	2	6	5	4	2	2	1	6	6	4	2	7	4	Beer with music	Beer TK	YES
Silence_SadSong	21	Female	IRELAND	2	2	6	2	6	6	1	1	5	3	6	7	3	6	Beer without music	No preference	NO
Silence_SadSong	24	Female	AUSTRALIA	5	6	2	2	4	2	5	4	5	2	3	3	3	2	Beer with music	Beer WD	NO
Silence_SadSong	30	Female	IRELAND	3	5	4	1	4	3	7	4	3	1	5	5	5	4	Beer with music	Beer TK	YES
Silence_SadSong	22	Male	ITALY	5	5	2	3	4	4	2	1	2	5	5	5	2	6	Beer without music	Beer WD	NO
Silence_SadSong	52	Male	SPAIN	4	4	5	5	5	5	4	3	5	4	4	6	2	2	Beer with music	Beer WD	YES
Silence_SadSong	23	Female	FRANCE	2	2	4	6	3	3	5	4	3	5	4	4	3	4	Beer with music	Beer TK	YES
Silence_SadSong	17	Male	BELGIUM	4	4	3	5	5	3	4	3	5	5	5	6	5	4	Beer with music	Beer TK	YES
Silence_SadSong	69	Male	SWITZERLAND	3	2	4	2	4	3	5	3	5	5	4	4	3	4	No preference	Beer TK	NO
Silence_SadSong	24	Male	UK	3	2	6	2	3	4	4	2	5	3	5	3	2	2	No preference	Beer TK	YES
Silence_SadSong	67	Male	UK	5	2	3	3	3	3	6	2	5	3	4	6	3	4	Beer with music	No preference	YES
Silence_SadSong	25	Female	TURKEY	7	2	3	5	3	5	6	1	6	4	5	4	2	3	No preference	Beer WD	YES
Silence_SadSong	57	Female	FRANCE	2	2	4	2	5	2	1	2	7	5	6	3	4	2	No preference	No preference	NO
Silence_SadSong	30	Male	BELGIUM	4	2	4	5	3	3	6	2	4	5	5	5	3	5	Beer with music	Beer TK	YES
Silence_SadSong	24	Female	GERMANY	5	3	6	7	5	4	6	4	4	3	5	6	6	5	Beer with music	Beer TK	NO
Silence_SadSong	57	Male	GERMANY	3	4	4	5	4	4	6	4	4	4	6	6	6	3	Beer with music	Beer TK	NO
Silence_SadSong	22	Male	ITALY	5	4	5	4	3	3	5	4	6	4	5	5	3	4	No preference	Beer TK	NO
Silence_SadSong	33	Female	FRANCE	5	3	4	2	3	4	6	3	6	2	6	4	3	4	Beer with music	Beer TK	YES
Silence_SadSong	34	Female	FRANCE	4	4	5	5	4	4	3	2	6	5	5	6	4	4	Beer with music	Beer TK	NO
Silence_SadSong	20	Female	AUSTRALIA	4	3	3	1	2	2	4	1	6	1	4	4	4	7	Beer with music	Beer WD	YES
Silence_SadSong	26	Female	FRANCE	1	1	7	6	5	3	5	3	6	6	6	4	2	6	Beer with music	Beer TK	YES
Silence_SadSong	37	Male	HUNGARY	3	3	5	2	3	5	5	4	5	3	3	5	2	3	No preference	No preference	NO
Silence_SadSong	24	Male	CANADA	5	4	1	2	2	1	4	4	5	4	2	3	7	6	Beer with music	Beer TK	YES
Silence_SadSong	22	Female	UK	5	2	4	5	5	4	5	2	6	5	5	5	6	5	Beer with music	Beer TK	YES
Silence_SadSong	26	Female	UK	3	5	2	5	5	5	3	4	3	5	5	2	3	5	Beer with music	Beer WD	YES
Silence_SadSong	27	Female	DENMARK	4	3	5	4	4	4	6	2	6	4	5	5	4	6	Beer with music	Beer TK	YES
Silence_SadSong	26	Female	BELGIUM	3	2	6	5	4	4	4	6	1	2	6	6	4	5	Beer with music	Beer TK	NO
Silence_SadSong	29	Male	SPAIN	1	1	5	3	6	6	2	1	4	3	6	6	3	4	Beer with music	No preference	YES
Silence_SadSong	25	Male	GREECE	4	2	5	4	3	4	4	2	4	3	2	5	3	5	Beer with music	Beer TK	NO
Silence_SadSong	38	Male	BELGIUM	4	2	6	6	4	4	4	2	6	5	4	5	2	5	Beer with music	No preference	YES
Silence_SadSong	24	Female	AUSTRALIA	4	5	4	3	2	3	7	5	5	3	4	5	4	4	Beer with music	Beer TK	NO
Silence_SadSong	26	Male	BELGIUM	7	1	6	2	5	2	7	1	5	3	5	2	5	5	Beer with music	No preference	NO
Silence_SadSong	26	Male	BELGIUM	5	2	6	3	5	5	6	3	7	4	5	6	5	6	Beer without music	Beer TK	YES
Silence_SadSong	27	Male	ITALY	5	1	5	4	1	2	5	3	4	4	3	3	2	4	Beer without music	Beer TK	NO
Silence_SadSong	43	Male	BRAZIL	4	1	6	2	3	5	5	1	5	1	5	4	2	5	Beer with music	Beer TK	YES
Silence_SadSong	39	Male	BELGIUM	5	4	6	4	5	5	5	4	6	4	5	4	2	2	Beer with music	No preference	NO
Silence_SadSong	27	Male	FRANCE	6	2	6	5	6	4	6	2	5	5	6	4	3	6	Beer with music	Beer WD	YES
Silence_SadSong	25	Male	USA	2	2	2	2	2	3	1	2	1	1	2	4	3	3	No preference	No preference	NO
Silence_SadSong	20	Male	FRANCE	5	6	3	4	2	4	4	3	4	6	5	2	5	3	No preference	Beer WD	NO
Silence_SadSong	21	Female	FRANCE	5	4	5	4	3	4	3	3	5	4	4	4	1	5	Beer without music	Beer WD	NO
Silence_SadSong	48	Male	FRANCE	5	3	5	4	5	1	5	1	7	5	6	2	2	6	Beer with music	Beer TK	YES
Silence_SadSong	27	Male	BRAZIL	7	3	4	5	2	5	5	3	6	5	4	5	4	4	Beer with music	Beer WD	NO
Silence_SadSong	28	Female	BRAZIL	7	5	2	4	5	3	4	3	7	4	6	5	1	5	Beer without music	Beer WD	NO
Silence_SadSong	28	Male	BELGIUM	4	3	6	6	3	3	5	6	5	2	3	5	4	6	Beer with music	Beer TK	YES
Silence_SadSong	30	Male	BELGIUM	5	5	2	2	2	3	4	2	5	4	5	3	4	2	Beer without music	Beer WD	NO
Silence_SadSong	27	Female	BELGIUM	5	4	2	1	5	6	3	1	5	1	4	3	3	2	Beer with music	Beer WD	YES
Silence_SadSong	23	Male	SINGAPORE	5	5	4	3	5	4	5	3	5	4	6	6	4	5	No preference	Beer WD	NO
Silence_SadSong	16	Male	FRANCE	5	6	5	2	3	3	5	3	4	6	4	4	2	5	Beer with music	Beer WD	YES
Silence_SadSong	21	Male	GERMANY	4	3	5	3	5	5	4	2	5	3	4	5	5	4	Beer with music	No preference	NO
Silence_SadSong	31	Male	UK	5	3	5	5	3	3	5	3	5	5	3	3	3	4	No preference	No preference	NO
Silence_SadSong	22	Female	SPAIN	2	2	6	5	6	6	3	2	6	5	5	6	2	7	Beer with music	Beer TK	YES
Silence_SadSong	24	Female	FRANCE	3	4	5	4	5	5	1	2	7	2	4	5	1	5	Beer with music	No preference	NO
Silence_SadSong	49	Male	FRANCE	5	5	3	3	4	2	6	2	4	4	7	4	4	3	Beer with music	Beer TK	YES
Silence_SadSong	32	Male	POLAND	4	3	5	2	3	5	4	2	5	3	4	6	4	6	Beer with music	Beer TK	NO
Silence_SadSong	29	Female	UK	5	3	3	4	2	3	3	3	4	5	4	4	2	1	Beer without music	Beer WD	NO
Silence_SadSong	29	Male	FRANCE	6	3	4	4	4	3	6	4	5	4	5	3	2	2	Beer with music	Beer TK	YES

## Sheet: Out Put Exp 1- Zinnebir N221
		Frequency	Percent
Valid	Female	99	44.8
	Male	121	54.8
	Total	220	99.5
Missing	System	1	0.5
Total		221	100
		Frequency	Percent
Valid	AUSTRALIA	7	3.2
	BELGIUM	65	29.4
	BRAZIL	6	2.7
	CANADA	3	1.4
	CHILE	1	0.5
	CHINA	1	0.5
	CYPRUS	2	0.9
	DENMARK	1	0.5
	FRANCE	41	18.6
	GERMANY	7	3.2
	GREECE	2	0.9
	HUNGARY	2	0.9
	INDIA	1	0.5
	IRELAND	8	3.6
	ITALY	10	4.5
	MEXICO	2	0.9
	NETHERLANDS	1	0.5
	NORWAY	2	0.9
	POLAND	2	0.9
	RUSSIA	1	0.5
	SINGAPORE	3	1.4
	SOUTH AFRICA	1	0.5
	SPAIN	12	5.4
	SWEDEN	1	0.5
	SWITZERLAND	3	1.4
	TURKEY	1	0.5
	UAE	1	0.5
	UK	26	11.8
	USA	8	3.6
	Total	221	100
		Frequency	Percent
Valid	Europe	188	85.1
	America	19	8.6
	Asia	6	2.7
	Oceania	7	3.2
	Africa	1	0.5
	Total	221	100
Age
N	Valid	221
	Missing	0
Mean		32.31
Std. Deviation		12.964
Minimum		16
Maximum		69
LIKING BEER
		Mean	Std. Deviation
Pair 1	Liking_Silence	4.3	1.567
	Liking_Music	4.34	1.659
Pair 2	Sweet_Silence	2.81	1.374
	Sweet_Music	2.71	1.297
Pair 3	Bitter_Silence	4.64	1.343
	Bitter_Music	4.8	1.368
Pair 4	Sour_Silence	3.55	1.444
	Sour_Music	3.65	1.567
Pair 5	Strong_Silence	4.03	1.245
	Strong_Music	4.24	1.251
Pair 6	Body_Silence	3.81	1.275
	Body_Music	4.07	1.219
Source		Type III Sum of Squares	df	Mean Square	F	Sig.	Partial Eta Squared	Observed Power
linking		0.310067	1	0.310067	0.261097	0.609882	0.0011908	0.0801388	WITHIN
linking * Group		2.69921	1	2.69921	2.27291	0.133094	0.010272	0.323402	INTERACTION
Error(linking)		260.075	219	1.18756
Group		10.8195	1	10.8195	2.71554	0.100809	0.0122478	0.374908	BETWEEN
Error		872.561	219	3.98429
Tests of Between-Subjects Effects
Source	Type III Sum of Squares	df	Mean Square	F	Sig.	Partial Eta Squared	Noncent. Parameter	Observed Powera
Intercept	8262.91	1	8262.91	2073.87	1.17461e-113	0.904487	2073.87	1
Group	10.8195	1	10.8195	2.71554	0.100809	0.0122478	2.71554	0.374908
Error	872.561	219	3.98429
Group	Mean	Std. Error
HappySong	4.48571	0.137742
SadSong	4.17241	0.131048
Descriptive Statistics
Group		Mean	Std. Deviation	N
Liking_Silence	Silence_HappySong	4.38095	1.67206	105
	Silence_SadSong	4.22414	1.46902	116
	Total	4.29864	1.56712	221
Liking_Music	Silence_HappySong	4.59048	1.80648	105
	Silence_SadSong	4.12069	1.48708	116
	Total	4.34389	1.6595	221
3. Group * factor1
Measure: MEASURE_1
Group		Mean	Std. Error	95% Confidence Interval
				Lower Bound	Upper Bound
Silence_HappySong	1	4.38095	0.153092	4.07923	4.68267
	2	4.59048	0.160682	4.2738	4.90716
Silence_SadSong	1	4.22414	0.145652	3.93708	4.5112
	2	4.12069	0.152874	3.8194	4.42198
2. Group
Measure: MEASURE_1
Group	Mean	Std. Error	95% Confidence Interval
			Lower Bound	Upper Bound
Silence_HappySong	4.48571	0.137742	4.21424	4.75718
Silence_SadSong	4.17241	0.131048	3.91414	4.43069
SWEET
Source		Type III Sum of Squares	df	Mean Square	F	Sig.	Partial Eta Squared	Observed Powera
Sweet		1.263	1	1.263	1.15	0.285	0.005	0.187
Sweet * Group		0.105	1	0.105	0.096	0.757	0	0.061
Error(Sweet)		240.592	219	1.099
Group		6.305	1	6.305	2.565	0.111	0.012	0.358
Error		538.274	219	2.458
Group	Mean	Std. Error
HappySong	2.886	0.108
SadSong	2.647	0.103
	Group	Mean	Std. Deviation	N
Sweet_Silence	HappySong	2.92	1.472	105
	SadSong	2.72	1.277	116
	Total	2.81	1.374	221
Sweet_Music	HappySong	2.85	1.343	105
	SadSong	2.58	1.245	116
	Total	2.71	1.297	221
BITTER
Source		Type III Sum of Squares	df	Mean Square	F	Sig.	Partial Eta Squared	Observed Powera
Bitter		2.5	1	2.5	1.756	0.187	0.008	0.261
Bitter * Group		0.464	1	0.464	0.326	0.569	0.001	0.088
Error(Bitter)		311.92	219	1.424
Group		0.039	1	0.039	0.017	0.895	0	0.052
Error		496.173	219	2.266
Group	Mean	Std. Error
Silence_HappySong	4.71	0.104
Silence_SadSong	4.728	0.099
	Group	Mean	Std. Deviation	N
Bitter_Silence	HappySong	4.67	1.377	105
	SadSong	4.62	1.316	116
	Total	4.64	1.343	221
Bitter_Music	HappySong	4.75	1.46	105
	SadSong	4.84	1.285	116
	Total	4.8	1.368	221
SOUR
Source		Type III Sum of Squares	df	Mean Square	F	Sig.	Partial Eta Squared	Observed Powera
Sour		0.982	1	0.982	0.912	0.341	0.004	0.158
Sour * Group		1.19	1	1.19	1.106	0.294	0.005	0.182
Error(Sour)		235.715	219	1.076
Group		0.062	1	0.062	0.018	0.894	0	0.052
Error		761.856	219	3.479
Group	Mean	Std. Error
HappySong	3.614	0.129
SadSong	3.591	0.122
	Group	Mean	Std. Deviation	N
Sour_Silence	HappySong	3.62	1.457	105
	SadSong	3.49	1.436	116
	Total	3.55	1.444	221
Sour_Music	HappySong	3.61	1.608	105
	SadSong	3.69	1.535	116
	Total	3.65	1.567	221
Source		Type III Sum of Squares	df	Mean Square	F	Sig.	Partial Eta Squared	Observed Powera
Strong		4.433	1	4.433	5.404	0.021	0.024	0.639	WITHIN
Strong * Group		2.577	1	2.577	3.142	0.078	0.014	0.423
Error(Strong)		179.635	219	0.82
Group		0.383	1	0.383	0.167	0.683	0.001	0.069
Error		502.473	219	2.294
Group	Mean	Std. Error
HappySong	4.167	0.105
SadSong	4.108	0.099
	Group	Mean	Std. Deviation	N
Strong_Silence	HappySong	4.14	1.376	105
	SadSong	3.93	1.109	116
	Total	4.03	1.245	221
Strong_Music	HappySong	4.19	1.316	105
	SadSong	4.28	1.193	116
	Total	4.24	1.251	221
Source		Type III Sum of Squares	df	Mean Square	F	Sig.	Partial Eta Squared	Observed Powera
Body		7.433	1	7.433	8.221	0.005	0.036	0.815	WITHIN
Body * Group		0.139	1	0.139	0.154	0.695	0.001	0.068
Error(Body)		198.01	219	0.904
Group		3.233	1	3.233	1.466	0.227	0.007	0.226
Error		482.853	219	2.205
Group	Mean	Std. Error
HappySong	4.033	0.102
SadSong	3.862	0.097
	Group	Mean	Std. Deviation	N
Body_Silence	HappySong	3.89	1.303	105
	SadSong	3.75	1.25	116
	Total	3.81	1.275	221
Body_Music	HappySong	4.18	1.108	105
	SadSong	3.97	1.309	116
	Total	4.07	1.219	221
	Group	N	Media	Desviación típ.
Liking_Song	HappySong	105	5.5	1.395
	SadSong	116	3.31	1.518
Match_BeerFlavour	HappySong	105	3.68	1.735
	SadSong	116	3.95	1.537
		Prueba de Levene para la igualdad de varianzas
		F	Sig.	t	gl	Sig. (bilateral)
Liking_Song	Se han asumido varianzas iguales	1.297	0.256	11.107	219	0	IND T-TEST
Match_BeerFlavour	Se han asumido varianzas iguales	4.44	0.036	-1.236	219	0.218
						Group		Total
						HappySong	SadSong
Experience_Preference			Beer with music			71	64	135	C= 0.127 X2= 3.616
						0.676	0.552	0.611	df= 2
			Beer without music			21	33	54	p = 0.164
						0.2	0.284	0.244
			No preference			13	19	32
						0.124	0.164	0.145
Total						105	116	221
						1	1	1
Beer_Preference	Beer TK					39	43	82	C= 0.083, X2= 1.515
						0.371	0.371	0.371	df= 2
	Beer WD					32	43	75	p = 0.469
						0.305	0.371	0.339
	No preference					34	30	64
						0.324	0.259	0.29
Total						105	116	221
						1	1	1
Willingnesstopay		NO				49	63	112	C= 0.083 X2(2) = 1.288 p = 0.076
						0.467	0.543	0.507
		YES				56	53	109
						0.533	0.457	0.493
Total						105	116	221
						1	1	1

## Sheet: Data Set Exp 2- Jupiler N154
					Condition A: ALEGRE - Chopin o Cumbia								Condition B: TRISTE Siempre Prematura
Condition_Code	Orden de presentación	Age	Gender	Country	PLiking_Beer	PMatch_Song_Beer	PSweetness	PBitterness	PSourness	PStrength	PBody	PLiking_Song	NLiking_Beer	NMatch_Song_Beer	NSweetness	NBitterness	NSourness	NStrength	NBody	NLiking_Song	Experience_Prefer	Beer_Preference	PayMore_withsong	Willingness_to_Pay_TKBeer	Willingness_to_Pay_WDBeer
1	Chopin_Prematura_Jupiler	69	Female	Belgium	4	6	6	3	5	6	3	6	6	2	4	7	3	7	7	2	Beer without music	Beer WD	NO	4	4
1	Chopin_Prematura_Jupiler	29	Male	Singapore	6	5	4	3	1	3	5	5	1	1	2	5	1	5	5	2	No preference	Beer TK	NO	4	1
1	Chopin_Prematura_Jupiler	33	Male	USA	3	4	2	4	4	2	2	5	5	5	2	4	1	4	4	4	Beer with music	Beer WD	YES	2	3
1	Chopin_Prematura_Jupiler	33	Female	Italy	5	5	3	4	2	3	2	7	5	3	3	3	3	3	3	3	Beer with music	Beer TK	YES	6	6
1	Chopin_Prematura_Jupiler	23	Male	Italy	5	6	5	5	5	5	4	6	5	3	5	4	4	4	5	3	Beer with music	Beer TK	NO	6	5
1	Chopin_Prematura_Jupiler	67	Male	Belgium	6	3	3	5	5	6	5	6	7	2	5	5	4	6	4	2	Beer with music	Beer WD	NO	4	6
1	Chopin_Prematura_Jupiler	22	Male	Spain	5	4	5	4	6	2	3	5	5	2	6	3	3	2	2	3	No preference	Beer WD	YES	3	3
1	Chopin_Prematura_Jupiler	37	Male	USA	5	5	2	5	5	3	3	5	4	4	2	5	3	3	5	4	Beer with music	Beer TK	YES	4	3
1	Chopin_Prematura_Jupiler	44	Male	Spain	4	5	5	5	4	2	2	6	3	3	4	4	3	3	3	3	Beer with music	Beer TK	YES	4	2
1	Chopin_Prematura_Jupiler	23	Female	Czech Republic	6	5	6	5	4	2	4	7	4	7	2	4	3	6	3	4	Beer with music	Beer TK	YES	5	4
1	Chopin_Prematura_Jupiler	39	Female	Italy	5	5	2	5	3	4	4	7	4	1	2	5	3	4	3	1	Beer with music	Beer TK	NO	4	4
1	Chopin_Prematura_Jupiler	33	Female	Spain	5	4	3	4	4	4	4	7	3	5	2	4	5	6	5	5	Beer with music	Beer TK	NO	4	4
1	Chopin_Prematura_Jupiler	21	Male	Netherlands	6	6	3	2	2	1	2	5	4	6	2	5	4	4	2	4	No preference	Beer TK	YES	4	3
1	Chopin_Prematura_Jupiler	44	Male	Spain	3	3	2	5	5	4	2	5	3	5	3	5	5	3	3	5		No preference	NO	3	3
1	Chopin_Prematura_Jupiler	29	Female	Italy	4	5	5	4	4	3	3	5	3	5	3	4	4	5	6	2	Beer with music	Beer TK	YES	4	5
1	Chopin_Prematura_Jupiler	24	Male	Romania	5	5	3	5	2	5	4	5	2	1	2	4	4	2	3	1	No preference	Beer TK	NO	6	2
1	Chopin_Prematura_Jupiler	17	Female	Croatia	6	5	2	3	1	3	5	7	3	4	1	5	6	5	6	1		Beer TK	NO	5	4
1	Chopin_Prematura_Jupiler	17	Female	Croatia	5	4	5	1	1	2	4	7	2	5	1	6	7	5	4	3	Beer with music	Beer TK	YES	6	1
1	Chopin_Prematura_Jupiler	17	Female	Croatia	5	5	2	4	4	4	1	7	1	6	1	4	7	3	1	3	Beer with music	Beer TK	YES	4	2
1	Chopin_Prematura_Jupiler	34	Male	Spain	5	3	4	3	2	5	4	6	4	1	2	5	5	5	5	2	No preference	Beer TK	NO	4	3
1	Chopin_Prematura_Jupiler	52	Male	France	3	6	4	3	3	2	4	6	1	5	2	6	5	5	2	2	Beer with music	Beer TK	YES	3	1
1	Chopin_Prematura_Jupiler	57	Male	Spain	5	3	2	6	5	5	5	7	5	4	3	6	5	5	5	6	Beer with music	Beer TK	YES	5	4
1	Chopin_Prematura_Jupiler	21	Male	Poland	6	3	2	6	4	5	5	7	6	6	1	7	4	6	6	1	Beer with music	Beer TK	YES	5	3
1	Chopin_Prematura_Jupiler	26	Female	France	5	3	3	4	4	6	6	7	5	7	3	5	5	6	6	6	No preference	No preference	YES	3	3
1	Chopin_Prematura_Jupiler	21	Male	Belgium	6	2	4	6	2	7	3	6	5	2	3	4	1	3	2	1	Beer with music	Beer TK	YES	3	1
1	Chopin_Prematura_Jupiler	25	Male	Netherlands	2	4	2	3	3	3	2	6	5	5	2	4	3	5	5	4	Beer with music	Beer WD	YES	3	5
1	Chopin_Prematura_Jupiler	29	Male	Belgium	6	6	3	5	3	3	4	3	3	4	2	5	4	3	6	2		Beer TK	NO	4	2
1	Chopin_Prematura_Jupiler	32	Male	Germany	5	2	3	5	3	4	3	7	3	4	3	4	2	4	3	3		Beer TK	YES	3	2
1	Chopin_Prematura_Jupiler	21	Female	England	5	2	3	5	2	2	6	6	1	5	4	7	3	3	4	4		Beer TK	YES	4	1
1	Chopin_Prematura_Jupiler	24	Male	France	5	4	3	5	3	4	3	5	5	3	4	5	5	5	3	5		Beer TK	YES	5	5
1	Chopin_Prematura_Jupiler	27	Female	Spain	4	4	2	4	4	5	4	5	4	5	2	4	5	5	5	3	Beer with music	Beer TK	YES	4	4
1	Chopin_Prematura_Jupiler	26	Male	Belgium	2	1	1	6	5	3	6	5	1	7	1	7	5	5	6	1	Beer with music	Beer TK	NO	5	5
1	Chopin_Prematura_Jupiler	34	Female	Belgium	3	1	3	3	6	3	4	6	5	6	1	5	5	6	6	3	No preference	Beer WD	YES	2	6
1	Chopin_Prematura_Jupiler	32	Male	Spain	5	3	3	5	5	5	3	6	4	6	1	6	6	3	5	6		Beer TK	YES	6	5
1	Chopin_Prematura_Jupiler	25	Male	Portugal	7	6	5	2	3	4	5	6	7	1	5	2	2	2	1	1	Beer with music	Beer WD	NO	3	2
1	Chopin_Prematura_Jupiler	26	Male	Italy	4	6	3	6	4	1	1	7	2	1	1	4	1	4	1	1	Beer with music	No preference	YES	5	4
1	Chopin_Prematura_Jupiler	60	Male	France	5	5	2	5	3	4	5	4	5	4	3	5	3	5	5	3		No preference	YES	5	5
1	Chopin_Prematura_Jupiler	23	Female	Italy	6	5	3	2	3	2	3	5	2	5	1	4	4	5	4	3	Beer with music	Beer TK	NO	7	4
1	Chopin_Prematura_Jupiler	56	Female	Italy	7	7	1	4	1	4	4	7	4	4	1	4	4	4	1	1		Beer TK	YES	5	3
1	Chopin_Prematura_Jupiler	26	Male	Italy	6	5	4	4	5	3	4	6	2	5	3	2	4	6	5	1	Beer with music	Beer TK	YES	4	2
1	Chopin_Prematura_Jupiler	22	Female	Spain	5	4	4	3	4	3	4	5	5	4	4	5	4	3	4	3	No preference	No preference	YES	3	3
1	Chopin_Prematura_Jupiler	25	Male	Holland	6	4	3	3	3	4	5	5	4	2	2	5	4	5	3	2		Beer TK	YES	5	4
1	Chopin_Prematura_Jupiler	22	Female	France	6	3	3	3	5	4	4	7	5	6	4	5	5	3	4	1	Beer with music	Beer TK	NO	7	4
1	Chopin_Prematura_Jupiler	29	Female	France	4	3	3	6	1	5	3	6	5	5	4	4	4	4	4	4		Beer WD	NO	4	5
1	Prematura_Chopin_Jupiler	52	Female	Belgium	4	4	4	4	4	7	2	7	7	1	4	4	4	7	4	2	Beer with music	Beer WD	YES	6	6
1	Prematura_Chopin_Jupiler	59	Female	France	5	5	4	5	4	4	4	7	7	4	3	4	2	3	4	5	Beer with music	No preference	YES	4	4
1	Prematura_Chopin_Jupiler	26	Female	Singapore	4	2	5	2	2	1	5	6	4	6	1	6	1	7	7	7	Beer with music	Beer WD	YES	1	7
1	Prematura_Chopin_Jupiler	26	Female	Denmark	5	3	4	3	3	4	4	6	3	6	3	4	3	5	5	3	Beer with music	Beer WD	YES	4	6
1	Prematura_Chopin_Jupiler	22	Male	USA	4	3	3	1	2	2	3	5	7	6	2	5	3	5	6	7	Beer with music	Beer WD	YES	5	7
1	Prematura_Chopin_Jupiler	36	Male	Belgium	5	5	4	5	3	5	3	4	5	4	4	5	2	6	5	4	Beer with music	Beer WD	YES	5	6
1	Prematura_Chopin_Jupiler	46	Female	Spain	6	6	5	5	6	3	5	6	4	5	3	5	3	2	4	5	Beer with music	Beer TK	YES	5	4
1	Prematura_Chopin_Jupiler	36	Female	Belgium	5	6	6	4	4	5	2	6	4	5	2	5	4	5	2	3	Beer with music	No preference	NO	5	6
1	Prematura_Chopin_Jupiler	33	Male	Spain	7	4	1	1	4	7	7	7	7	7	2	2	4	6	7	5	Beer with music	No preference	YES	6	6
1	Prematura_Chopin_Jupiler	31	Female	Netherlands	2	2	4	2	2	2	2	7	5	1	4	2	2	2	2	2	Beer with music	No preference	YES	3	3
1	Prematura_Chopin_Jupiler	28	Male	Italy	6	6	5	4	4	2	3	6	5	5	2	4	4	4	5	3	Beer with music	Beer TK	YES	5	6
1	Prematura_Chopin_Jupiler	18	Female	Croatia	3	6	2	3	3	3	3	2	6	2	4	2	3	3	3	2	Beer with music	Beer TK	YES	7	4
1	Prematura_Chopin_Jupiler	18	Female	Croatia	6	5	5	4	3	4	5	6	6	7	3	4	4	4	6	3	No preference	Beer TK	YES	5	4
1	Prematura_Chopin_Jupiler	17	Female	Croatia	5	5	5	3	4	4	4	7	5	2	2	3	1	5	5	2	Beer with music	Beer TK	YES	5	3
1	Prematura_Chopin_Jupiler	34	Male	Spain	4	6	6	3	2	2	2	6	6	7	2	5	3	6	6	5	Beer with music	No preference	YES	5	4
1	Prematura_Chopin_Jupiler	19	Female	Poland	2	6	3	6	4	5	3	7	2	2	2	6	4	2	4	4	Beer with music	Beer TK	YES	4	3
1	Prematura_Chopin_Jupiler	26	Male	Belgium	4	3	5	4	4	5	5	7	5	5	1	6	5	4	3	2	Beer with music	Beer TK	YES	4	3
1	Prematura_Chopin_Jupiler	25	Female	Belgium	4	4	2	4	2	2	1	5	3	1	1	4	5	2	3	1		Beer TK	NO	2	1
1	Prematura_Chopin_Jupiler	25	Male	Germany	7	5	5	1	3	2	4	6	4	5	3	5	2	5	5	5	Beer with music	Beer TK	NO	6	5
1	Prematura_Chopin_Jupiler	63	Male	Belgium	6	4	4	4	5	5	4	6	6	5	4	5	4	4	3	3	Beer with music	Beer TK	NO	4	3
1	Prematura_Chopin_Jupiler	25	Male	Spain	5	5	4	2	3	6	3	6	4	6	2	5	1	4	5	2	No preference	Beer TK	YES	4	3
1	Prematura_Chopin_Jupiler	25	Female	France	3	2	1	5	6	6	3	7	3	6	2	5	3	5	4	3		Beer WD	NO	4	6
1	Prematura_Chopin_Jupiler	26	Female	Spain	2	4	2	3	2	3	2	7	2	4	3	3	2	3	2	4	Beer with music	No preference	YES	2	2
1	Prematura_Chopin_Jupiler	26	Female	Austria	4	4	3	5	5	4	4	5	5	5	3	5	3	4	4	3	Beer with music	Beer WD	YES	3	4
1	Prematura_Chopin_Jupiler	41	Male	France	4	4	3	6	3	5	3	4	5	5	4	6	2	5	4	5		Beer WD	NO	4	5
1	Prematura_Chopin_Jupiler	22	Male	Belgium	5	6	4	4	2	4	4	5	6	3	5	5	2	4	5	5	Beer with music	Beer WD	YES	4	6
1	Prematura_Chopin_Jupiler	36	Female	France	4	5	2	2	5	3	2	5	6	5	3	5	3	5	5	6		Beer WD	NO	3	5
1	Prematura_Chopin_Jupiler	23	Male	Portugal	6	7	5	2	3	5	4	5	6	5	5	4	3	6	5	1		Beer TK	NO	3	5
1	Prematura_Chopin_Jupiler	60	Male	Lava	4	4	1	3	1	4	4	5	4	4	1	5	1	4	3	4	No preference	No preference	NO	5	5
1	Prematura_Chopin_Jupiler	25	Female	Italy	4	2	3	4	4	3	5	2	6	6	3	5	4	4	4	4		Beer WD	YES	4	5
1	Prematura_Chopin_Jupiler	26	Female	Suisse	4	2	2	6	2	5	5	5	4	6	2	6	2	5	6	2	Beer without music	No preference	NO	3	3
1	Prematura_Chopin_Jupiler	23	Female	Spain	7	7	6	5	6	4	2	7	6	4	5	5	4	4	4	3	Beer with music	Beer TK	YES	3	3
1	Prematura_Chopin_Jupiler	53	Male	Sweden	7	2	2	5	2	5	4	7	7	7	2	6	3	5	6	6		Beer WD	YES	3	5
1	Prematura_Chopin_Jupiler	23	Male	France	5	6	3	3	5	2	2	6	5	4	2	5	1	4	4	5	Beer with music	Beer TK	NO	6	5
2	Cumbia_Prematura_Jupiler	55	Female	Spain	4	1	3	3	4	2	4	2	5	2	3	3	4	3	4	2	Beer with music	No preference	YES	7	7
2	Cumbia_Prematura_Jupiler	63	Female	Spain	5	6	3	4	5	5	4	4	5	3	4	4	5	6	5	3	Beer with music	No preference	YES	4	4
2	Cumbia_Prematura_Jupiler	29	Female	Togo	5	5	4	3	6	4	3	5	2	2	3	3	2	2	2	1	No preference	Beer TK	NO	5	2
2	Cumbia_Prematura_Jupiler	44	Female	Spain	4	4	4	3	4	5	5	4	5	5	6	3	5	3	4	5	Beer with music	Beer TK	NO	4	3
2	Cumbia_Prematura_Jupiler	27	Male	Belgium	5	5	2	6	4	4	5	7	3	6	1	3	6	2	4	6	Beer with music	Beer TK	YES	4	3
2	Cumbia_Prematura_Jupiler	27	Male	Spain	4	4	2	4	2	3	4	2	2	4	4	2	2	2	2	2	Beer with music	Beer TK	YES	3	2
2	Cumbia_Prematura_Jupiler	24	Male	Italy	5	6	4	5	5	4	5	6	5	7	3	5	4	5	5	6	Beer with music	Beer TK	NO	6	7
2	Cumbia_Prematura_Jupiler	48	Male	Spain	5	2	3	5	4	6	5	6	5	4	2	5	4	5	5	2	Beer with music	No preference	NO	5	5
2	Cumbia_Prematura_Jupiler	37	Female	USA	4	1	2	2	4	2	1	4	2	6	2	4	3	2	4	4	Beer with music	No preference	YES	5	5
2	Cumbia_Prematura_Jupiler	54	Male	France	5	3	3	2	1	3	3	5	5	5	3	2	1	3	3	5	Beer with music	No preference	YES	4	4
2	Cumbia_Prematura_Jupiler	24	Male	USA	6	2	2	3	2	3	6	7	3	7	2	4	2	7	6	2	Beer with music	Beer TK	YES	5	3
2	Cumbia_Prematura_Jupiler	51	Male	Spain	5	2	2	5	3	5	5	2	3	5	3	3	6	2	3	1	Beer without music	Beer TK	NO	5	3
2	Cumbia_Prematura_Jupiler	27	Female	Spain	6	6	2	3	2	3	4	7	4	1	1	5	4	4	5	4	Beer with music	Beer TK	YES	4	3
2	Cumbia_Prematura_Jupiler	23	Male	Spain	7	5	2	6	6	5	6	7	3	2	4	5	5	4	4	2	Beer with music	Beer TK	YES	5	3
2	Cumbia_Prematura_Jupiler	60	Male	Spain	5	2	3	5	4	4	5	2	4	5	3	3	3	3	4	4		Beer TK	NO	5	4
2	Cumbia_Prematura_Jupiler	17	Female	Croatia	6	3	2	3	3	5	4	5	5	3	5	3	3	3	2	6	Beer with music	Beer TK	YES	6	3
2	Cumbia_Prematura_Jupiler	17	Female	Croatia	3	4	4	4	3	2	4	4	2	4	1	3	1	3	5	3	Beer with music	Beer TK	YES	5	2
2	Cumbia_Prematura_Jupiler	21	Female	France	5	2	3	2	3	2	1	2	4	4	3	4	3	3	4	4		Beer WD	NO	3	4
2	Cumbia_Prematura_Jupiler	55	Female	Spain	6	2	1	5	6	4	4	5	5	6	2	3	4	4	4	5		Beer TK	YES	3	2
2	Cumbia_Prematura_Jupiler	27	Male	Netherlands	3	1	2	6	6	3	4	4	3	5	2	5	6	4	3	2	Beer with music	Beer TK	YES	5	4
2	Cumbia_Prematura_Jupiler	21	Female	Germany	7	6	6	2	4	4	4	6	3	6	2	6	4	5	4	3	Beer with music	Beer TK	YES	5	3
2	Cumbia_Prematura_Jupiler	28	Male	Netherlands	4	5	3	5	3	2	2	5	4	2	2	5	3	2	4	1		No preference	YES	4	4
2	Cumbia_Prematura_Jupiler	28	Female	Netherlands	3	1	3	5	2	3	4	3	4	2	5	5	4	3	3	3		Beer TK	YES	3	3
2	Cumbia_Prematura_Jupiler	32	Female	Belgium	3	5	2	5	1	5	5	5	2	6	1	6	5	6	7	2		Beer TK	NO	4	1
2	Cumbia_Prematura_Jupiler	17	Female	France	6	4	1	3	3	4	4	5	4	6	4	1	7	4	4	1	Beer without music	Beer TK	YES	5	4
2	Cumbia_Prematura_Jupiler	26	Female	Cyprus	7	5	4	1	3	4	2	7	3	3	2	6	6	5	5	1	Beer with music	Beer TK	YES	7	7
2	Cumbia_Prematura_Jupiler	39	Male	Germany	4	1	2	5	4	5	7	6	2	2	2	5	6	5	4	3		Beer TK	NO	6	3
2	Cumbia_Prematura_Jupiler	62	Female	Belgium	2	2	2	3	3	3	3	5	2	5	2	2	2	4	2	4	No preference	Beer WD	NO	3	4
2	Cumbia_Prematura_Jupiler	31	Female	Belgium	5	5	4	5	2	4	4	6	4	3	1	6	2	3	4	5	No preference	Beer TK	YES	5	3
2	Cumbia_Prematura_Jupiler	22	Female	England	6	5	4	2	3	3	3	6	1	2	1	7	7	5	5	3	Beer with music	Beer TK	YES	6	1
2	Cumbia_Prematura_Jupiler	40	Male	Ireland	6	6	3	4	5	4	4	6	5	4	5	2	3	3	2	5	Beer with music	Beer TK	YES	5	4
2	Cumbia_Prematura_Jupiler	60	Female	France	4	5	5	4	4	4	4	6	3	3	3	6	3	5	5	3	Beer with music	Beer TK	NO	5	4
2	Cumbia_Prematura_Jupiler	32	Male	Spain	4	5	4	6	4	5	4	5	4	3	3	4	5	4	3	3	Beer with music	Beer TK	NO	6	5
2	Cumbia_Prematura_Jupiler	26	Female	Italy	4	4	4	4	1	1	4	4	1	7	1	7	7	1	4	1	No preference	Beer TK	YES	5	4
2	Cumbia_Prematura_Jupiler	31	Female	Portugal	4	5	3	5	3	4	4	4	2	6	2	2	3	4	3	2	Beer with music	Beer TK	YES	6	3
2	Cumbia_Prematura_Jupiler	25	Female	Holland	7	6	5	2	2	6	4	7	3	1	3	3	3	4	3	2	Beer with music	Beer TK	YES	5	5
2	Cumbia_Prematura_Jupiler	26	Male	Spain	6	3	6	5	6	4	5	4	6	5	5	4	5	6	6	2	Beer with music	Beer WD	YES	5	7
2	Cumbia_Prematura_Jupiler	31	Female	Belgium	6	4	3	2	4	5	6	6	3	4	1	6	5	7	4	1	Beer with music	Beer TK	YES	6	4
2	Cumbia_Prematura_Jupiler	30	Male	USA	4	6	2	1	1	1	2	5	4	1	2	2	1	3	4	1		Beer WD	NO	2	3
2	Cumbia_Prematura_Jupiler	22	Male	France	7	6	3	4	1	4	4	5	4	3	2	5	5	5	5	5	No preference	Beer WD	YES	6	5
2	Prematura_Cumbia_Jupiler	20	Male	Spain	2	5	2	2	2	2	2	3	6	2	3	4	4	5	3	2	No preference	Beer WD	NO	3	6
2	Prematura_Cumbia_Jupiler	63	Male	Spain	5	2	2	6	2	3	3	5	5	6	2	3	2	5	5	4	Beer with music	Beer WD	YES	4	5
2	Prematura_Cumbia_Jupiler	27	Female	Belgium	4	6	2	5	3	3	3	7	4	3	2	5	3	3	3	6	Beer with music	No preference	YES	4	4
2	Prematura_Cumbia_Jupiler	44	Male	Spain	6	7	3	3	4	3	4	6	6	7	3	4	4	3	2	7	Beer with music	No preference	NO	5	5
2	Prematura_Cumbia_Jupiler	22	Female	Italy	6	3	5	3	4	2	4	7	6	4	2	6	4	3	5	1	Beer with music	Beer TK	YES	5	7
2	Prematura_Cumbia_Jupiler	44	Female	Spain	7	6	4	4	5	4	4	7	2	2	2	4	4	4	5	1	Beer with music	Beer TK	YES	6	4
2	Prematura_Cumbia_Jupiler	33	Female	Belgium	5	5	4	3	1	5	4	5	4	3	2	2	2	4	4	3	Beer with music	No preference	YES	5	5
2	Prematura_Cumbia_Jupiler	35	Male	Spain	4	1	1	3	4	1	3	1	3	2	1	3	4	1	3	5	Beer with music	No preference	YES	4	4
2	Prematura_Cumbia_Jupiler	52	Female	Belgium	5	6	2	2	1	3	7	4	4	4	5	4	1	2	7	4	Beer with music	Beer WD	NO	5	5
2	Prematura_Cumbia_Jupiler	27	Female	USA	6	6	5	2	3	4	4	7	3	6	1	4	1	5	5	1	Beer with music	Beer TK	YES	5	4
2	Prematura_Cumbia_Jupiler	51	Female	Spain	4	4	4	4	6	4	3	4	6	5	2	6	4	6	4	2	Beer with music	Beer WD	YES	2	4
2	Prematura_Cumbia_Jupiler	21	Male	Spain	5	5	6	3	4	3	4	6	5	4	4	5	2	5	3	2	Beer with music	Beer WD	YES	4	5
2	Prematura_Cumbia_Jupiler	46	Male	Spain	5	5	5	4	5	4	4	5	5	4	4	5	5	4	5	5	Beer with music	Beer TK	YES	3	3
2	Prematura_Cumbia_Jupiler	22	Female	Spain	6	1	7	1	4	2	3	5	4	5	1	3	3	3	2	4	Beer with music	Beer WD	YES	3	5
2	Prematura_Cumbia_Jupiler	30	Female	UK	6	7	4	3	3	4	4	6	6	2	4	3	1	6	6	1	Beer with music	Beer WD	YES	6	6
2	Prematura_Cumbia_Jupiler	53	Male	Spain	4	7	4	2	3	2	2	6	4	7	1	7	5	5	5	4		No preference	NO	2	3
2	Prematura_Cumbia_Jupiler	27	Female	France	2	4	2	4	2	2	2	5	1	1	1	1	5	2	2	1	No preference	No preference	NO	1	1
2	Prematura_Cumbia_Jupiler	52	Male	USA	6	5	5	5	4	3	3	4	7	7	3	2	3	3	7	3	Beer with music	Beer WD	NO	4	6
2	Prematura_Cumbia_Jupiler	22	Male	Germany	6	2	4	2	1	4	3	5	5	3	3	2	1	2	3	5	Beer with music	Beer TK	YES	4	3
2	Prematura_Cumbia_Jupiler	32	Male	Belgium	5	5	5	3	3	3	3	5	5	5	3	6	3	4	4	4	No preference	No preference	YES	6	5
2	Prematura_Cumbia_Jupiler	31	Female	Germany	4	2	2	5	2	5	3	5	4	5	4	4	2	5	3	5	Beer with music	No preference	YES	4	4
2	Prematura_Cumbia_Jupiler	18	Female	France	5	3	2	5	6	3	5	3	5	4	2	5	6	3	7	2	No preference	Beer WD	NO	2	4
2	Prematura_Cumbia_Jupiler	27	Female	Cyprus	5	5	2	2	2	5	4	7	6	3	2	2	4	5	3	2	Beer with music	Beer TK	YES	5	3
2	Prematura_Cumbia_Jupiler	26	Female	France	6	5	3	4	3	2	3	6	7	4	3	4	6	4	4	5	Beer with music	Beer WD	YES	6	6
2	Prematura_Cumbia_Jupiler	45	Female	France	2	3	2	5	6	4	2	5	6	5	4	5	4	4	3	4		Beer WD	YES	2	7
2	Prematura_Cumbia_Jupiler	32	Female	Belgium	5	2	5	4	1	5	5	4	5	6	4	5	1	5	5	7	Beer with music	Beer WD	YES	5	6
2	Prematura_Cumbia_Jupiler	25	Male	England	5	6	5	4	3	3	3	6	5	5	3	4	4	5	3	5	Beer with music	Beer WD	YES	6	6
2	Prematura_Cumbia_Jupiler	21	Female	Italy	5	7	2	5	3	2	4	6	5	6	4	5	3	5	4	3		Beer WD	YES	5	5
2	Prematura_Cumbia_Jupiler	62	Female	France	5	4	3	3	5	5	5	5	4	2	1	4	3	4	3	3	Beer with music	Beer WD	NO	1	2
2	Prematura_Cumbia_Jupiler	46	Male	France	4	4	3	3	3	4	4	5	5	6	2	3	4	4	4	5		Beer WD	YES	4	4
2	Prematura_Cumbia_Jupiler	58	Female	Belgium	5	7	4	3	3	3	2	7	6	5	2	5	6	4	4	6	Beer with music	No preference	NO	4	5
2	Prematura_Cumbia_Jupiler	24	Female	Italy	5	3	1	6	1	4	5	7	6	7	1	5	1	4	4	6	Beer with music	Beer WD	YES	3	7
2	Prematura_Cumbia_Jupiler	63	Female	Belgium	4	4	2	5	5	4	2	4	2	2	1	4	5	2	2	1	Beer without music	No preference	NO	1	1
2	Prematura_Cumbia_Jupiler	27	Male	Spain	1	4	1	1	2	1	2	1	3	6	1	2	2	2	3	2	Beer with music	Beer WD	NO	1	5
2	Prematura_Cumbia_Jupiler	32	Female	Warsaw	5	5	4	5	2	3	4	6	4	2	3	4	5	5	4	4	Beer with music	Beer TK	NO	4	4
2	Prematura_Cumbia_Jupiler	30	Female	USA	4	5	2	2	1	1	1	5	2	5	1	4	3	3	3	4		Beer TK	YES	3	3
					4.80519	4.22727	3.27922	3.79221	3.36364	3.61688	3.66234	5.42208	4.17532	4.20779	2.6039	4.33766	3.55195	4.1039	4.06494	3.24026

## Sheet: Output Exp 2 - Jupiler N154
Gender
		Frequency	Percent	Valid Percent	Cumulative Percent
Valid	Female	83	53.9	53.9	53.9
	Male	71	46.1	46.1	100
	Total	154	100	100
Descriptive Statistics
	N	Minimum	Maximum	Mean	Std. Deviation
Age	154	17	69	33.24	13.351
Valid N (listwise)	154
Country
		Frequency	Percent	Valid Percent	Cumulative Percent
Valid	Austria	1	0.6	0.6	0.6
	Belgium	25	16.2	16.2	16.9
	Croatia	8	5.2	5.2	22.1
	Cyprus	2	1.3	1.3	23.4
	Czech Republic	1	0.6	0.6	24
	Denmark	1	0.6	0.6	24.7
	England	3	1.9	1.9	26.6
	France	22	14.3	14.3	40.9
	Germany	6	3.9	3.9	44.8
	Holland	2	1.3	1.3	46.1
	Ireland	1	0.6	0.6	46.8
	Italy	15	9.7	9.7	56.5
	Lava	1	0.6	0.6	57.1
	Netherlands	6	3.9	3.9	61
	Poland	2	1.3	1.3	62.3
	Portugal	3	1.9	1.9	64.3
	Romania	1	0.6	0.6	64.9
	Singapore	2	1.3	1.3	66.2
	Spain	38	24.7	24.7	90.9
	Suisse	1	0.6	0.6	91.6
	Sweden	1	0.6	0.6	92.2
	Togo	1	0.6	0.6	92.9
	UK	1	0.6	0.6	93.5
	USA	9	5.8	5.8	99.4
	Warsaw	1	0.6	0.6	100
	Total	154	100	100
Continent
		Frequency	Percent	Valid Percent	Cumulative Percent
Valid	European	142	92.2	92.2	92.2
	American	9	5.8	5.8	98.1
	Asia	2	1.3	1.3	99.4
	African	1	0.6	0.6	100
	Total	154	100	100
Liking Beer
Tests of Within-Subjects Effects
Measure: MEASURE_1
Source		Type III Sum of Squares	df	Mean Square	F	Sig.	Partial Eta Squared	Noncent. Parameter	Observed Powera
Liking_Beer	Sphericity Assumed	30.759	1	30.759	19.343	0	0.113	19.343	0.992	WITHIN
Liking_Beer * Condition_Code	Sphericity Assumed	2.239	1	2.239	1.408	0.237	0.009	1.408	0.218
Error(Liking_Beer)	Sphericity Assumed	241.712	152	1.59
a. Computed using alpha = ,05
Tests of Between-Subjects Effects
Measure: MEASURE_1
Transformed Variable: Average
Source	Type III Sum of Squares	df	Mean Square	F	Sig.	Partial Eta Squared	Noncent. Parameter	Observed Powera
Intercept	6206.3	1	6206.3	2530.82	0	0.943	2530.82	1
Condition_Code	1.724	1	1.724	0.703	0.403	0.005	0.703	0.133
Error	372.747	152	2.452
a. Computed using alpha = ,05
2. Liking_Beer
Measure: MEASURE_1
Liking_Beer	Mean	Std. Error	95% Confidence Interval
			Lower Bound	Upper Bound
POSITIVE	4.805	0.103	4.601	5.01
NEGATIVE	4.173	0.125	3.927	4.42
Condition_Code
Measure: MEASURE_1
Condition_Code	Mean	Std. Error	95% Confidence Interval
			Lower Bound	Upper Bound
POSITIVE 1	4.564	0.125	4.316	4.812
POSITIVE 2	4.414	0.127	4.164	4.665
3. Condition_Code * Liking_Beer
Measure: MEASURE_1
Condition_Code	Liking_Beer	Mean	Std. Error	95% Confidence Interval
				Lower Bound	Upper Bound
POSITIVE 1	1	4.795	0.145	4.508	5.082
	2	4.333	0.175	3.987	4.68
POSITIVE 2	1	4.816	0.147	4.525	5.107
	2	4.013	0.178	3.662	4.364
Sweetness
Tests of Within-Subjects Effects
Measure: MEASURE_1
Source		Type III Sum of Squares	df	Mean Square	F	Sig.	Partial Eta Squared	Noncent. Parameter	Observed Powera
Sweetness	Sphericity Assumed	35.053	1	35.053	27.22	0	0.152	27.22	0.999	WITHIN
Sweetness * Condition_Code	Sphericity Assumed	0.144	1	0.144	0.111	0.739	0.001	0.111	0.063
Error(Sweetness)	Sphericity Assumed	195.74	152	1.288
a. Computed using alpha = ,05
Tests of Between-Subjects Effects
Measure: MEASURE_1
Transformed Variable: Average
Source	Type III Sum of Squares	df	Mean Square	F	Sig.	Partial Eta Squared	Noncent. Parameter	Observed Powera
Intercept	2662.6	1	2662.6	1258	0	0.892	1258	1
Condition_Code	2.235	1	2.235	1.056	0.306	0.007	1.056	0.175
Error	321.713	152	2.117
a. Computed using alpha = ,05
2. Sweetness
Measure: MEASURE_1
Sweetness	Mean	Std. Error	95% Confidence Interval
			Lower Bound	Upper Bound
POSITIVE	3.278	0.109	3.062	3.494
NEGATIVE	2.603	0.101	2.404	2.802
1. Condition_Code
Measure: MEASURE_1
Condition_Code	Mean	Std. Error	95% Confidence Interval
			Lower Bound	Upper Bound			Descriptive Statistics
POSITIVE 1	3.026	0.116	2.796	3.256				Condition_Code	Mean	Std. Deviation	N
POSITIVE 2	2.855	0.118	2.622	3.088			HSweetness	Positive 1	3.38	1.351	78
								Positive 2	3.17	1.36	76
								Total	3.28	1.355	154
3. Condition_Code * Sweetness							SSweetness	Positive 1	2.67	1.245	78
Measure: MEASURE_1								Positive 2	2.54	1.259	76
Condition_Code	Sweetness	Mean	Std. Error	95% Confidence Interval				Total	2.6	1.249	154
				Lower Bound	Upper Bound
POSITIVE 1	1	3.385	0.153	3.081	3.688			Media	Desv
	2	2.667	0.142	2.387	2.947		Positive 1	3.025	1.298
POSITIVE 2	1	3.171	0.155	2.864	3.478		Positive 2	2.855	1.3095
	2	2.539	0.144	2.256	2.823		Total Positive	2.94	1.302
Bitternes
Tests of Within-Subjects Effects
Measure: MEASURE_1
Source		Type III Sum of Squares	df	Mean Square	F	Sig.	Partial Eta Squared	Noncent. Parameter	Observed Powera
Bitterness	Sphericity Assumed	22.715	1	22.715	15.571	0	0.093	15.571	0.975	WITHIN
Bitterness * Condition_Code	Sphericity Assumed	2.351	1	2.351	1.612	0.206	0.01	1.612	0.243
Error(Bitterness)	Sphericity Assumed	221.74	152	1.459
a. Computed using alpha = ,05
Tests of Between-Subjects Effects
Measure: MEASURE_1
Transformed Variable: Average
Source	Type III Sum of Squares	df	Mean Square	F	Sig.	Partial Eta Squared	Noncent. Parameter	Observed Powera
Intercept	5081.29	1	5081.29	2392.68	0	0.94	2392.68	1
Condition_Code	14.901	1	14.901	7.017	0.009	0.044	7.017	0.749
Error	322.8	152	2.124
a. Computed using alpha = ,05
2. Bitterness
Measure: MEASURE_1
Bitterness	Mean	Std. Error	95% Confidence Interval
			Lower Bound	Upper Bound
POSITIVE	3.79	0.111	3.572	4.009
NEGATIVE	4.334	0.105	4.126	4.541
							Descriptive Statistics
Measure: MEASURE_1								Condition_Code	Mean	Std. Deviation	N
Condition_Code	Mean	Std. Error	95% Confidence Interval				HBitterness	Chopin	3.92	1.356	78
			Lower Bound	Upper Bound				Cumbia	3.66	1.391	76
POSITIVE 1	4.282	0.117	4.052	4.513				Total	3.79	1.375	154
POSITIVE 2	3.842	0.118	3.609	4.076			SBitterness	Chopin	4.64	1.139	78
								Cumbia	4.03	1.451	76
								Total	4.34	1.334	154
3. Condition_Code * Bitterness
Measure: MEASURE_1
Condition_Code	Bitterness	Mean	Std. Error	95% Confidence Interval
				Lower Bound	Upper Bound
POSITIVE 1	1	3.923	0.155	3.616	4.23			Media	Desv
	2	4.641	0.147	4.35	4.932		Positive 1	4.28	1.2475
POSITIVE 2	1	3.658	0.158	3.347	3.969		Positive 2	3.845	1.421
	2	4.026	0.149	3.731	4.322		Total positive	4.064	1.3245
Sourness
Tests of Within-Subjects Effects
Measure: MEASURE_1
Source		Type III Sum of Squares	df	Mean Square	F	Sig.	Partial Eta Squared	Noncent. Parameter	Observed Powera
Sourness	Sphericity Assumed	2.812	1	2.812	1.744	0.189	0.011	1.744	0.259
Sourness * Condition_Code	Sphericity Assumed	3.617	1	3.617	2.243	0.136	0.015	2.243	0.319
Error(Sourness)	Sphericity Assumed	245.152	152	1.613
a. Computed using alpha = ,05
Tests of Between-Subjects Effects
Measure: MEASURE_1
Transformed Variable: Average
Source	Type III Sum of Squares	df	Mean Square	F	Sig.	Partial Eta Squared	Noncent. Parameter	Observed Powera
Intercept	3682.18	1	3682.18	1323.38	0	0.897	1323.38	1
Condition_Code	0.026	1	0.026	0.009	0.923	0	0.009	0.051
Error	422.925	152	2.782
a. Computed using alpha = ,05
2. Sourness
Measure: MEASURE_1
Sourness	Mean	Std. Error	95% Confidence Interval
			Lower Bound	Upper Bound
POSITIVE	3.362	0.115	3.134	3.591
NEGATIVE	3.553	0.123	3.31	3.797
1. Condition_Code
Measure: MEASURE_1
Condition_Code	Mean	Std. Error	95% Confidence Interval				Descriptive Statistics
			Lower Bound	Upper Bound				Condition_Code	Mean	Std. Deviation	N
POSITIVE 1	3.449	0.134	3.185	3.713			HSourness	Chopin	3.46	1.365	78
POSITIVE 2	3.467	0.135	3.2	3.734				Cumbia	3.26	1.5	76
								Total	3.36	1.432	154
							SSourness	Chopin	3.44	1.42	78
3. Condition_Code * Sourness								Cumbia	3.67	1.636	76
Measure: MEASURE_1								Total	3.55	1.53	154
Condition_Code	Sourness	Mean	Std. Error	95% Confidence Interval
				Lower Bound	Upper Bound
POSITIVE 1	1	3.462	0.162	3.141	3.782			Mean	St Desv
	2	3.436	0.173	3.094	3.778		Positive 1	3.45	1.3925
POSITIVE 2	1	3.263	0.164	2.938	3.588		Positive 2	3.456	1.568
	2	3.671	0.176	3.324	4.018		Total positive	3.45	1.483
Stenght
Tests of Within-Subjects Effects
Measure: MEASURE_1
Source		Type III Sum of Squares	df	Mean Square	F	Sig.	Partial Eta Squared	Noncent. Parameter	Observed Powera
Strength	Sphericity Assumed	18.159	1	18.159	14.65	0	0.088	14.65	0.967	WITHIN
Strength * Condition_Code	Sphericity Assumed	0.834	1	0.834	0.673	0.413	0.004	0.673	0.129
Error(Strength)	Sphericity Assumed	188.403	152	1.239
a. Computed using alpha = ,05
Tests of Between-Subjects Effects
Measure: MEASURE_1
Transformed Variable: Average
Source	Type III Sum of Squares	df	Mean Square	F	Sig.	Partial Eta Squared	Noncent. Parameter	Observed Powera
Intercept	4583.26	1	4583.26	1990.57	0	0.929	1990.57	1
Condition_Code	11.519	1	11.519	5.003	0.027	0.032	5.003	0.604
Error	349.978	152	2.302
a. Computed using alpha = ,05
2. Strength
Measure: MEASURE_1
Strength	Mean	Std. Error	95% Confidence Interval
			Lower Bound	Upper Bound
POSITIVE	3.615	0.108	3.401	3.829
NEGATIVE	4.101	0.106	3.891	4.31
1. Condition_Code
Measure: MEASURE_1
Condition_Code	Mean	Std. Error	95% Confidence Interval
			Lower Bound	Upper Bound			Descriptive Statistics
POSITIVE 1	4.051	0.121	3.811	4.291				Condition_Code	Mean	Std. Deviation	N
POSITIVE 2	3.664	0.123	3.421	3.908			HStrength	Chopin	3.76	1.452	78
								Cumbia	3.47	1.227	76
								Total	3.62	1.349	154
3. Condition_Code * Strength							SStrength	Chopin	4.35	1.288	78
Measure: MEASURE_1								Cumbia	3.86	1.344	76
Condition_Code	Strength	Mean	Std. Error	95% Confidence Interval				Total	4.1	1.334	154
				Lower Bound	Upper Bound
POSITIVE 1	1	3.756	0.152	3.455	4.057			Media	Desv
	2	4.346	0.149	4.052	4.64		Positive 1	4.055	1.37
POSITIVE 2	1	3.474	0.154	3.169	3.779		Positive 2	3.664	1.285
	2	3.855	0.151	3.557	4.153		Total positive	3.85	1.334
BODY
Tests of Within-Subjects Effects
Measure: MEASURE_1
Source		Type III Sum of Squares	df	Mean Square	F	Sig.	Partial Eta Squared	Noncent. Parameter	Observed Powera
Body	Sphericity Assumed	12.337	1	12.337	11.496	0.001	0.07	11.496	0.921	WITHIN
Body * Condition_Code	Sphericity Assumed	2.402	1	2.402	2.238	0.137	0.015	2.238	0.318
Error(Body)	Sphericity Assumed	163.118	152	1.073
a. Computed using alpha = ,05
Tests of Between-Subjects Effects
Measure: MEASURE_1
Transformed Variable: Average
Source	Type III Sum of Squares	df	Mean Square	F	Sig.	Partial Eta Squared	Noncent. Parameter	Observed Powera
Intercept	4596.5	1	4596.5	1897.49	0	0.926	1897.49	1
Condition_Code	0.067	1	0.067	0.028	0.868	0	0.028	0.053
Error	368.206	152	2.422
a. Computed using alpha = ,05
2. Body
Measure: MEASURE_1
Body	Mean	Std. Error	95% Confidence Interval
			Lower Bound	Upper Bound
POSITIVE	3.663	0.102	3.463	3.864
NEGATIVE	4.064	0.111	3.844	4.283
1. Condition_Code
Measure: MEASURE_1
Condition_Code	Mean	Std. Error	95% Confidence Interval				Descriptive Statistics
			Lower Bound	Upper Bound				Condition_Code	Mean	Std. Deviation	N
POSITIVE 1	3.878	0.125	3.632	4.124			HBody	Chopin	3.59	1.263	78
POSITIVE 2	3.849	0.126	3.599	4.098				Cumbia	3.74	1.258	76
								Total	3.66	1.259	154
							SBody	Chopin	4.17	1.49	78
3. Condition_Code * Body								Cumbia	3.96	1.259	76
Measure: MEASURE_1								Total	4.06	1.38	154
Condition_Code	Body	Mean	Std. Error	95% Confidence Interval
				Lower Bound	Upper Bound
POSITIVE 1	1	3.59	0.143	3.308	3.872			Mean	Desv
	2	4.167	0.156	3.858	4.476		Positive 1	3.88	1.3765
POSITIVE 2	1	3.737	0.145	3.451	4.023		Positive 2	3.85	1.2585
	2	3.961	0.158	3.648	4.273		Total positive	3.86	1.311
Liking Song
Tests of Within-Subjects Effects (POSITIVE VS NEGATIVE)
Measure: MEASURE_1
Source		Type III Sum of Squares	df	Mean Square	F	Sig.	Partial Eta Squared	Noncent. Parameter	Observed Powera
Liking_Song	Sphericity Assumed	364.57	1	364.57	170.193	0	0.528	170.193	1	WITHIN
Liking_Song_Song * Condition_Code	Sphericity Assumed	14.855	1	14.855	6.935	0.009	0.044	6.935	0.744	INTERACTION
Error(Liking_Song_Song)	Sphericity Assumed	325.599	152	2.142
a. Computed using alpha = ,05
Tests of Between-Subjects Effects
Measure: MEASURE_1
Transformed Variable: Average
Source	Type III Sum of Squares	df	Mean Square	F	Sig.	Partial Eta Squared	Noncent. Parameter	Observed Powera
Intercept	5770.43	1	5770.43	2458.32	0	0.942	2458.32	1
Condition_Code	10.431	1	10.431	4.444	0.037	0.028	4.444	0.554
Error	356.79	152	2.347
a. Computed using alpha = ,05
2. Liking_Song
Measure: MEASURE_1
Liking_Song	Mean	Std. Error	95% Confidence Interval
			Lower Bound	Upper Bound
POSITIVE	5.417	0.107	5.205	5.628
NEGATIVE	3.241	0.133	2.978	3.503
1. Condition_Code
Measure: MEASURE_1
Condition_Code	Mean	Std. Error	95% Confidence Interval
			Lower Bound	Upper Bound
POSITIVE 1	4.513	0.123	4.27	4.755
POSITIVE 2	4.145	0.124	3.899	4.39
3. Condition_Code * Liking_Song
Measure: MEASURE_1
Condition_Code	Liking_Song	Mean	Std. Error	95% Confidence Interval
				Lower Bound	Upper Bound
POSITIVE 1	POSITIVE	5.821	0.15	5.523	6.118
	NEGATIVE	3.205	0.187	2.836	3.574
POSITIVE 2	POSITIVE	5.013	0.152	4.712	5.314
	NEGATIVE	3.276	0.189	2.902	3.65
Match Song Beer
Tests of Within-Subjects Effects
Measure: MEASURE_1
Source		Type III Sum of Squares	df	Mean Square	F	Sig.	Partial Eta Squared	Noncent. Parameter	Observed Powera
Match_Song_Beer	Sphericity Assumed	0.029	1	0.029	0.009	0.926	0	0.009	0.051
Match_Song_Beer * Condition_Code	Sphericity Assumed	0.003	1	0.003	0.001	0.976	0	0.001	0.05
Error(Match_Song_Beer)	Sphericity Assumed	506.468	152	3.332
a. Computed using alpha = ,05
Tests of Between-Subjects Effects
Measure: MEASURE_1
Transformed Variable: Average
Source	Type III Sum of Squares	df	Mean Square	F	Sig.	Partial Eta Squared	Noncent. Parameter	Observed Powera
Intercept	5475.45	1	5475.45	2245.67	0	0.937	2245.67	1
Condition_Code	1.316	1	1.316	0.54	0.464	0.004	0.54	0.113
Error	370.609	152	2.438
a. Computed using alpha = ,05
2. Match_Song_Beer
Measure: MEASURE_1
Match_Song_Beer	Mean	Std. Error	95% Confidence Interval
			Lower Bound	Upper Bound
1	4.226	0.13	3.969	4.483
2	4.207	0.143	3.924	4.49
1. Condition_Code
Measure: MEASURE_1
Condition_Code	Mean	Std. Error	95% Confidence Interval
			Lower Bound	Upper Bound
Chopin	4.282	0.125	4.035	4.529
Cumbia	4.151	0.127	3.901	4.402
3. Condition_Code * Match_Song_Beer
Measure: MEASURE_1
Condition_Code	Match_Song_Beer	Mean	Std. Error	95% Confidence Interval
				Lower Bound	Upper Bound
Chopin	1	4.295	0.183	3.934	4.656
	2	4.269	0.201	3.871	4.667
Cumbia	1	4.158	0.185	3.792	4.524
	2	4.145	0.204	3.742	4.548
T Test Willing to pay
Beer_Preference * Condition_Code
Crosstab
			Condition_Code		Total
			Chopin	Cumbia
Beer_Preference	Beer TK	Count	45	37	82
		% within Condition_Code	0.577	0.487	0.532
	Beer WD	Count	20	23	43
		% within Condition_Code	0.256	0.303	0.279
	No preference	Count	13	16	29
		% within Condition_Code	0.167	0.211	0.188
Total		Count	78	76	154
		% within Condition_Code	1	1	1
Chi-Square Tests
	Value	df	Asymp. Sig. (2-sided)
Pearson Chi-Square	1,274a	2	0.529
Likelihood Ratio	1.276	2	0.528
N of Valid Cases	154
a. 0 cells (0,0%) have expected count less than 5. The minimum expected count is 14,31.
Symmetric Measures
		Value	Approx. Sig.
Nominal by Nominal	Contingency Coefficient	0.091	0.529
N of Valid Cases		154
a. Not assuming the null hypothesis.
b. Using the asymptotic standard error assuming the null hypothesis.

## Sheet: Data Set Exp 3 -ChimayBlue N157
					Condition A - Alegre: CHOPIN o CUMBIA								Condition B - Triste: PREMATURA								Other Variables
Condition_Code	orden de presentación	Age	Gender	Country	PLiking_Beer	PMatch_Song_Beer	PSweetness	PBitterness	PSourness	PStrength	PBody	PLiking_Song	NLiking_Beer	NMatch_Song_Beer	NSweetness	NBitterness	NSourness	NStrength	NBody	NLiking_Song	Experience_Prefer	Beer_Preference	PayMore_withsong	Willingness_to_Pay_TKBeer	Willingness_to_Pay_WDBeer
1	Chopin-Prematura	27	Male	Usa	5	5	1	2	1	2	3	5	2	4	1	5	5	4	6	1	Beer with music	Beer TK	YES	5	2
1	Chopin-Prematura	21	Female	Spain	3	3	2	4	5	7	7	7	6	4	5	4	4	2	5	2	Beer with music	Beer WD	YES	2	2
1	Chopin-Prematura	22	Female	Italy	5	6	5	3	3	3	4	6	1	4	1	3	5	5	4	2	Beer with music	Beer TK	YES	5	2
1	Chopin-Prematura	21	Female	Belgium	6	3	4	5	4	6	4	5	5	6	3	6	3	6	6	6	Beer with music	Beer WD	YES	6	4
1	Chopin-Prematura	65	Female	Belgium	5	3	5	3	3	5	5	4	5	1	4	3	4	5	4	1	Beer without music	Beer TK	NO	5	5
1	Chopin-Prematura	22	Female	Spain	6	3	5	3	2	5	5	7	6	3	6	2	3	3	3	6	Beer with music	Beer WD	YES	6	6
1	Chopin-Prematura	27	Male	Germany	6	4	5	3	3	5	6	6	3	3	4	4	4	5	4	4	No preference	Beer TK	NO	7	6
1	Chopin-Prematura	29	Male	Spain	7	7	3	4	4	5	6	6	2	7	2	6	6	6	6	2	Beer with music	Beer TK	NO	5	3
1	Chopin-Prematura	65	Male	Spain	6	7	6	6	4	7	7	6	6	2	5	6	5	6	6	2	Beer with music	Beer TK	NO	4	3
1	Chopin-Prematura	30	Female	Spain	3	3	2	4	3	4	4	2	5	4	4	2	2	2	4	4	Beer with music	Beer WD	YES	1	3
1	Chopin-Prematura	57	Male	Spain	5	6	3	4	4	5	4	6	5	3	3	3	2	3	3	6	Beer with music	Beer TK	YES	4	2
1	Chopin-Prematura	28	Female	Switzerland	4	4	5	2	1	4	3	5	5	1	3	3	2	3	5	2	Beer with music	Beer TK	NO	4	4
1	Chopin-Prematura	30	Female	France	6	5	4	6	2	6	5	5	4	2	3	5	4	4	5	5		Beer TK	NO	5	4
1	Chopin-Prematura	34	Male	Ireland	2	3	4	5	5	5	6	6	6	2	3	2	2	3	3	2	Beer with music	Beer WD	YES	4	6
1	Chopin-Prematura	32	Female	Italy	6	7	4	5	6	2	3	6	5	2	6	2	5	4	4	7	Beer with music	Beer WD	YES	5	3
1	Chopin-Prematura	35	Male	France	4	4	4	1	1	2	2	7	3	1	4	1	1	2	2	1	Beer with music	Beer TK	NO	2	4
1	Chopin-Prematura	17	Male	Croatia	6	5	5	2	2	3	5	6	5	6	2	5	3	4	7	5		Beer TK	YES	5	7
1	Chopin-Prematura	24	Female	Russia	3	1	1	4	2	5	4	3	3	3	2	3	4	3	3	2	Beer without music	Beer WD	NO	2	3
1	Chopin-Prematura	49	Male	Belgium	4	4	4	4	2	4	3	4	5	4	3	5	4	5	4	4	No preference	No preference	NO	2	2
1	Chopin-Prematura	54	Female	Italy	7	6	5	2	5	3	1	7	3	1	1	6	2	5	4	2	Beer with music	Beer TK	YES	1	1
1	Chopin-Prematura	41	Male	Australia	7	5	5	2	1	4	4	7	3	2	3	6	5	6	5	4	No preference	Beer TK	NO	6	6
1	Chopin-Prematura	58	Female	Malta	6	6	3	3	4	3	4	6	5	1	4	3	3	3	3	1	No preference	Beer WD	YES	4	5
1	Chopin-Prematura	36	Female	Italy	7	1	6	3	3	6	6	5	3	6	2	6	6	6	4	2	Beer with music	Beer WD	YES	1	4
1	Chopin-Prematura	23	Female	Belgium	6	5	5	2	4	2	4	7	3	3	2	4	2	6	6	4	Beer with music	Beer TK	YES	6	4
1	Chopin-Prematura	32	Female	France	6	5	5	4	4	3	4	6	4	3	4	3	4	5	5	2	Beer with music	Beer TK	YES	5	3
1	Chopin-Prematura	54	Male	France	7	5	5	2	3	2	5	6	5	3	5	2	3	2	5	4	Beer with music	No preference	YES	4	4
1	Chopin-Prematura	36	Male	Argentina	5	2	2	4	4	4	5	7	5	6	4	4	4	3	2	1		Beer TK	NO	5	3
1	Chopin-Prematura	34	Male	France	6	6	4	5	3	6	5	5	4	3	4	4	5	5	3	4		Beer TK	NO	6	4
1	Chopin-Prematura	27	Female	Belgium	5	6	2	5	4	6	5	7	1	2	2	5	5	3	4	1	Beer with music	Beer TK	YES	6	3
1	Chopin-Prematura	29	Male	Belgium	5	1	2	5	4	5	5	1	4	5	2	3	2	4	4	4	Beer with music	Beer TK	NO	7	6
1	Chopin-Prematura	28	Male	Belgium	6	2	4	4	5	4	5	6	6	5	4	5	3	4	4	3	Beer with music	No preference	NO	5	5
1	Chopin-Prematura	30	Female	UK	4	5	5	4	5	5	4	6	2	6	1	6	2	7	7	2		Beer TK	YES	6	2
1	Chopin-Prematura	23	Male	Germany	6	6	3	3	1	4	6	6	2	2	2	4	3	3	4	6		Beer TK	YES	3	1
1	Chopin-Prematura	53	Male	France	6	5	4	6	1	5	4	7	6	5	4	4	2	4	5	5		Beer WD	NO	5	5
1	Chopin-Prematura	32	Male	France	6	4	5	4	3	5	4	7	5	6	4	4	3	5	5	4		No preference	NO	5	5
1	Chopin-Prematura	61	Female	France	5	2	2	2	6	6	3	7	4	2	4	4	5	5	4	1		Beer TK	NO	4	3
1	Chopin-Prematura	23	Male	Italy	4	5	5	3	4	2	4	6	3	5	2	5	4	4	5	2		Beer TK	NO	4	2
1	Chopin-Prematura	22	Male	Switzerland	7	2	2	5	2	5	5	5	3	5	2	5	4	5	5	1		Beer TK	YES	4	4
1	Chopin-Prematura	69	Male	France	6	3	3	3	2	5	4	7	4	1	4	2	1	4	4	2		Beer WD	NO	4	6
1	Chopin-Prematura	28	Female	Belgium	7	6	5	1	7	5	6	7	1	1	1	7	3	6	5	1	Beer with music	Beer TK	YES	7	2
1	Chopin-Prematura	53	Male	Belgium	5	4	5	4	2	4	5	4	4	4	4	4	4	4	4	4	No preference	Beer TK	YES	6	6
1	Chopin-Prematura	50	Male	UK	5	3	5	4	2	5	6	4	5	2	4	3	2	5	5	2		No preference	NO	5	5
1	Prematura-Chopin	26	Female	Spain	7	2	3	4	5	3	6	6	5	3	5	4	4	2	4	3	Beer with music	Beer WD	YES	3	3
1	Prematura-Chopin	26	Male	Italy	6	7	5	4	4	5	4	7	6	6	3	3	5	4	6	1	Beer with music	No preference	YES	4	4
1	Prematura-Chopin	39	Female	Spain	3	1	1	4	3	3	2	6	1	4	1	4	4	3	6	6	Beer without music	No preference	NO	5	5
1	Prematura-Chopin	57	Male	Spain	4	4	3	4	4	3	4	4	4	4	4	5	5	5	5	4	Beer with music	Beer TK	YES	3	3
1	Prematura-Chopin	16	Female	Italy	6	6	2	4	3	5	4	3	7	6	3	4	4	3	4	2	Beer with music	Beer WD	YES	4	5
1	Prematura-Chopin	25	Male	Spain	6	6	3	5	1	5	5	7	6	2	3	5	3	5	4	1	Beer with music	Beer TK	YES	6	4
1	Prematura-Chopin	27	Female	Germany	5	6	5	4	6	4	5	7	6	3	3	3	4	4	5	3	Beer with music	No preference	YES	5	5
1	Prematura-Chopin	29	Female	Spain	1	2	2	6	4	5	3	4	1	5	4	7	4	5	1	2	No preference	No preference	NO	3	3
1	Prematura-Chopin	28	Male	Spain	6	6	5	5	6	4	5	6	6	5	3	5	4	5	5	2	Beer with music	Beer WD	YES	5	4
1	Prematura-Chopin	54	Female	Spain	3	1	5	4	5	4	4	3	4	6	5	3	5	4	4	5	Beer with music	Beer WD	YES	4	4
1	Prematura-Chopin	29	Female	Spain	5	4	5	5	5	3	4	5	4	1	3	3	3	3	5	2	Beer with music	Beer TK	YES	5	5
1	Prematura-Chopin	30	Male	Switzerland	5	5	4	2	4	3	2	4	3	6	2	6	4	5	5	2	No preference	Beer TK	YES	4	4
1	Prematura-Chopin	34	Female	Ireland	3	3	2	4	5	3	2	7	4	5	4	4	2	5	4	6	Beer with music	Beer WD	NO	3	4
1	Prematura-Chopin	46	Male	Italy	6	2	1	6	5	5	5	7	6	6	1	6	2	5	5	6	Beer with music	No preference	YES	5	5
1	Prematura-Chopin	47	Male	Belgium	5	5	5	4	3	3	3	5	4	4	4	5	4	3	3	2	Beer without music	No preference	NO	5	5
1	Prematura-Chopin	17	Female	Croatia	7	7	5	2	2	6	5	6	5	7	1	5	4	6	6	2	No preference	Beer TK	YES	5	3
1	Prematura-Chopin	18	Female	Croatia	6	3	5	5	5	4	3	6	7	6	2	5	5	6	6	3	Beer with music	Beer WD	YES	4	6
1	Prematura-Chopin	30	Male	France	6	5	5	4	2	5	5	5	5	3	6	3	1	4	5	3	Beer with music	Beer WD	YES	6	5
1	Prematura-Chopin	54	Male	Italy	6	6	3	2	3	5	6	6	5	5	3	3	5	5	4	5	Beer with music	Beer TK	YES	6	5
1	Prematura-Chopin	43	Female	Australia	1	1	1	5	5	6	5	7	4	1	4	2	1	4	3	1	Beer with music	Beer WD	NO	1	3
1	Prematura-Chopin	38	Male	Italy	2	2	3	5	5	4	2	3	6	5	5	4	2	5	3	4	Beer with music	Beer WD	YES	2	5
1	Prematura-Chopin	24	Female	Spain	3	5	3	5	4	5	4	6	5	5	4	3	4	3	3	5	Beer with music	Beer WD	YES	4	5
1	Prematura-Chopin	22	Female	Germany	4	7	4	3	4	6	3	7	3	7	2	5	3	7	5	5	Beer with music	Beer TK	NO	6	5
1	Prematura-Chopin	20	Female	Netherlands	5	5	1	3	1	2	2	7	6	3	2	6	2	3	5	7	Beer with music	Beer WD	NO	4	6
1	Prematura-Chopin	36	Male	France	6	6	4	4	5	4	4	7	6	7	3	5	4	6	3	5	Beer with music	Beer TK	YES	6	6
1	Prematura-Chopin	49	Female	France	5	6	3	4	3	3	4	6	6	5	3	5	4	5	5	3	Beer with music	Beer TK	YES	5	6
1	Prematura-Chopin	25	Female	Argentina	7	7	3	4	4	6	7	7	6	3	4	5	5	5	5	3	Beer with music	Beer TK	YES	5	2
1	Prematura-Chopin	42	Female	Belgium	5	6	4	5	1	5	4	5	5	5	5	5	1	6	7	2	Beer with music	Beer WD	NO	5	4
1	Prematura-Chopin	27	Female	Spain	4	2	2	5	5	5	5	6	6	1	4	5	2	3	3	1	Beer with music	Beer WD	YES	4	6
1	Prematura-Chopin	23	Female	Belgium	1	1	3	7	1	5	4	7	4	6	5	3	2	6	4	4	Beer with music	No preference	YES	6	6
1	Prematura-Chopin	25	Female	UK	6	4	5	2	2	5	3	5	4	5	3	3	5	6	5	5	Beer with music	Beer TK	YES	7	4
1	Prematura-Chopin	24	Female	Germany	5	6	4	3	3	3	3	6	5	5	3	3	4	5	5	3	Beer with music	Beer TK	NO	3	2
1	Prematura-Chopin	53	Female	France	4	4	5	4	4	4	4	7	2	4	2	6	6	5	4	1	Beer with music	Beer TK	NO	3	2
1	Prematura-Chopin	28	Female	France	2	2	3	6	7	5	5	5	3	5	4	5	6	5	5	4	No preference	Beer WD	YES	3	5
1	Prematura-Chopin	31	Female	Belgium	3	5	5	4	6	4	4	6	4	6	3	5	3	5	4	4	Beer with music	Beer WD	YES	3	4
1	Prematura-Chopin	58	Female	France	5	3	5	3	2	4	4	6	4	5	2	5	4	6	5	5	Beer with music	Beer WD	NO	5	5
1	Prematura-Chopin	64	Male	Belgium	5	5	4	3	4	5	2	5	3	3	3	5	3	4	4	2	Beer with music	Beer TK	YES	3	4
1	Prematura-Chopin	52	Female	France	6	4	2	3	7	6	4	7	5	7	4	6	4	6	6	4	Beer with music	Beer TK	YES	6	6
1	Prematura-Chopin	50	Male	France	4	5	2	5	2	3	2	4	5	2	2	3	4	5	3	2	Beer without music	Beer WD	NO	1	2
1	Prematura-Chopin	27	Male	Germany	4	3	2	2	4	5	5	4	5	6	2	2	4	6	5	5	Beer with music	Beer WD	NO	3	4
1	Prematura-Chopin	25	Male	Spain	7	5	4	5	5	3	6	6	5	3	3	5	4	4	5	4	Beer with music	Beer WD	YES	3	5
1	Prematura-Chopin	59	Male	UK	5	4	2	3	2	2	3	6	3	4	2	3	4	3	5	6	No preference	Beer TK	NO	4	2
1	Prematura-Chopin	53	Male	Sweden	5	4	4	5	2	6	3	5	6	6	4	5	2	7	5	5	Beer with music	Beer WD	NO	5	7
1	Prematura-Chopin	27	Female	France	2	2	3	2	5	4	4	6	2	4	3	3	2	5	5	5	No preference	Beer WD	YES	3	3
1	Prematura-Chopin	24	Male	Belgium	5	4	3	4	4	6	5	6	2	3	2	5	3	5	6	2	Beer with music	Beer TK	YES	6	2
1	Prematura-Chopin	20	Female	UK	1	1	1	7	1	4	4	7	3	7	3	7	5	6	4	5	Beer with music	Beer WD	YES	1	5
2	Cumbia-Prematura	46	Female	Spain	5	3	3	5	5	4	4	2	4	3	2	7	6	6	5	1	Beer with music	Beer TK	YES	4	4
2	Cumbia-Prematura	55	Female	Spain	4	4	4	5	5	4	4	3	4	4	4	4	3	4	4	4	Beer with music	No preference	YES	2	1
2	Cumbia-Prematura	65	Female	Spain	6	6	6	6	6	6	6	5	6	6	5	4	4	4	5	4	Beer with music	Beer WD	NO	5	4
2	Cumbia-Prematura	46	Female	Italy	5	7	2	6	4	4	5	5	4	3	4	3	4	5	4	2	Beer without music	Beer TK	NO	5	3
2	Cumbia-Prematura	32	Female	Spain	5	5	1	6	7	7	7	7	5	6	3	5	4	6	4	6	Beer with music	No preference	NO	6	4
2	Cumbia-Prematura	18	Male	Spain	6	6	2	6	5	5	5	5	5	3	1	3	6	6	4	4	Beer with music	Beer TK	YES	4	2
2	Cumbia-Prematura	26	Female	Spain	5	2	4	2	1	5	2	4	4	1	3	4	1	5	2	1	Beer with music	No preference	YES	4	4
2	Cumbia-Prematura	54	Male	France	4	3	5	5	3	3	3	4	2	2	3	4	2	2	2	2	No preference	Beer TK	NO	3	1
2	Cumbia-Prematura	52	Female	Spain	6	6	2	1	5	3	4	5	3	3	3	5	3	5	3	2	Beer with music	Beer WD	YES	4	5
2	Cumbia-Prematura	38	Male	Malta	5	4	6	4	3	5	5	5	5	6	2	6	5	4	6	5	No preference	Beer TK	YES	7	6
2	Cumbia-Prematura	26	Female	Italy	7	5	4	4	2	2	2	7	3	3	4	2	2	2	2	1	Beer with music	Beer TK	YES	6	5
2	Cumbia-Prematura	24	Male	Scotland	4	5	6	1	2	2	2	5	3	3	4	3	4	3	4	4	No preference	Beer WD	NO	4	3
2	Cumbia-Prematura	22	Female	Switzerland	5	5	3	2	3	4	5	4	2	3	2	6	5	6	6	4		Beer TK	NO	5	4
2	Cumbia-Prematura	17	Female	Croatia	7	6	4	5	7	5	6	6	4	4	3	6	6	6	6	5	Beer with music	No preference	YES	5	3
2	Cumbia-Prematura	24	Male	Russia	6	4	3	6	2	5	6	4	6	6	2	6	1	7	5	5	Beer with music	Beer WD	YES	5	7
2	Cumbia-Prematura	32	Male	Italy	4	3	4	4	3	4	4	5	6	6	6	4	3	3	2	6	Beer with music	Beer WD	NO	4	6
2	Cumbia-Prematura	18	Male	Spain	6	5	4	4	2	2	4	2	3	3	3	4	5	4	4	2		Beer TK	YES	3	2
2	Cumbia-Prematura	36	Male	Portugal	4	3	5	2	3	5	5	4	5	5	5	2	2	5	5	5	No preference	No preference	NO	6	6
2	Cumbia-Prematura	38	Male	Belgium	6	6	3	5	5	3	4	5	2	1	2	2	3	3	2	1	Beer with music	Beer TK	YES	3	3
2	Cumbia-Prematura	23	Male	Germany	6	2	6	3	4	6	5	5	5	5	5	5	5	4	4	3		Beer WD	NO	5	5
2	Cumbia-Prematura	29	Male	Spain	5	4	2	5	4	2	2	6	2	7	1	5	5	6	2	1		Beer TK	YES	3	1
2	Cumbia-Prematura	24	Male	France	4	5	2	5	5	5	4	6	4	3	3	5	5	5	4	3	Beer with music	Beer WD	YES	3	5
2	Cumbia-Prematura	31	Female	France	3	2	5	6	3	5	4	5	3	4	4	5	4	4	4	4		No preference	YES	6	6
2	Cumbia-Prematura	18	Male	Germany	7	6	7	2	1	2	4	3	6	1	5	3	3	2	3	4	Beer with music	Beer TK	YES	5	4
2	Cumbia-Prematura	27	Male	Spain	6	4	3	4	5	4	4	6	3	6	2	3	5	4	4	2	Beer with music	Beer TK	YES	3	2
2	Cumbia-Prematura	32	Male	France	6	2	6	3	3	4	5	5	3	3	2	6	5	4	3	3	Beer with music	Beer TK	NO	4	1
2	Cumbia-Prematura	21	Female	Belgium	5	4	5	4	5	2	3	5	4	5	3	5	6	4	6	1	Beer with music	Beer TK	NO	5	2
2	Cumbia-Prematura	45	Male	Spain	7	7	3	4	2	4	2	5	2	4	1	5	6	6	7	1	Beer with music	Beer TK	YES	5	5
2	Cumbia-Prematura	55	Male	France	5	6	2	4	7	5	4	7	2	7	2	7	6	5	2	1	Beer with music	Beer TK	NO	5	2
2	Cumbia-Prematura	37	Male	Belgium	6	6	5	3	3	5	4	6	4	1	5	4	4	5	4	1		No preference	NO	5	5
2	Cumbia-Prematura	26	Male	Italy	4	3	5	4	4	2	2	6	3	6	2	4	3	3	4	5	Beer with music	Beer TK	NO	4	4
2	Cumbia-Prematura	45	Female	Italy	6	4	3	4	5	5	6	4	3	5	2	5	3	6	5	2	Beer with music	Beer TK	NO	5	2
2	Cumbia-Prematura	65	Male	Iran	6	3	4	3	2	4	3	5	5	3	5	2	2	6	4	5	Beer without music	Beer TK	YES	4	5
2	Cumbia-Prematura	65	Male	France	4	3	2	5	2	6	5	5	6	6	4	3	3	3	3	6	Beer with music	Beer TK	YES	6	3
2	Cumbia-Prematura	44	Female	Spain	2	5	3	4	2	3	5	1	1	1	1	7	7	7	7	1		Beer TK	YES	3	2
2	Cumbia-Prematura	49	Female	UK	1	1	2	7	4	5	7	2	1	3	1	5	6	5	7	1		Beer WD	YES	2	2
2	Prematura-Cumbia	23	Female	Usa	4	4	4	3	2	4	3	5	5	5	2	6	1	5	6	5	Beer with music	Beer WD	NO	4	6
2	Prematura-Cumbia	18	Male	Spain	5	6	4	4	3	4	3	5	4	3	5	4	4	3	5	5	Beer with music	No preference	YES	7	3
2	Prematura-Cumbia	32	Male	France	6	6	5	2	3	2	4	6	5	6	3	5	3	3	5	2	Beer with music	No preference	NO	6	6
2	Prematura-Cumbia	25	Male	Spain	5	4	5	2	4	4	4	7	4	6	2	3	4	6	4	2	Beer without music	Beer TK	NO	3	2
2	Prematura-Cumbia	70	Male	Spain	1	1	2	2	3	5	6	1	4	1	2	4	4	4	7	1	Beer with music	Beer WD	YES	4	5
2	Prematura-Cumbia	46	Male	Italy	6	5	4	3	4	4	4	6	5	5	3	4	4	2	4	2	Beer with music	Beer TK	NO	5	4
2	Prematura-Cumbia	37	Female	Spain	3	1	1	2	5	5	4	1	5	4	1	1	5	3	5	4	Beer with music	Beer WD	YES	2	5
2	Prematura-Cumbia	38	Male	Spain	5	5	6	5	5	4	5	7	6	5	5	5	5	6	5	1	Beer with music	Beer WD	YES	4	6
2	Prematura-Cumbia	55	Male	Spain	3	2	4	3	1	2	2	1	5	4	3	4	5	3	5	3	Beer without music	Beer WD	YES	2	4
2	Prematura-Cumbia	29	Male	Spain	5	4	4	3	4	5	4	4	5	2	3	4	4	5	3	1	Beer with music	No preference	YES	5	5
2	Prematura-Cumbia	45	Male	Belgium	2	3	2	3	5	5	6	2	5	5	2	3	2	3	2	5	Beer with music	Beer WD	YES	2	5
2	Prematura-Cumbia	27	Female	Malta	6	7	5	3	2	3	3	5	5	2	5	4	2	3	4	3	Beer with music	Beer TK	YES	6	4
2	Prematura-Cumbia	32	Male	Italy	7	6	3	5	5	2	3	6	7	6	5	4	4	2	5	5	Beer with music	Beer WD	YES	7	5
2	Prematura-Cumbia	21	Male	Mexico	7	5	5	3	3	2	3	7	5	3	4	4	3	3	4	5		Beer TK	YES	4	3
2	Prematura-Cumbia	17	Female	Croatia	7	7	4	4	5	4	6	7	7	3	4	4	3	5	5	3	Beer with music	Beer TK	YES	5	2
2	Prematura-Cumbia	20	Male	Spain	5	4	2	3	2	3	3	5	5	5	1	4	1	3	5	2	Beer with music	No preference	YES	3	3
2	Prematura-Cumbia	39	Female	Portugal	5	4	5	5	5	5	5	5	6	5	6	5	5	4	4	5	Beer with music	No preference	YES	5	5
2	Prematura-Cumbia	22	Female	Germany	3	3	4	3	6	5	4	6	3	5	4	6	5	5	4	3	Beer with music	No preference	NO	1	2
2	Prematura-Cumbia	29	Female	France	1	1	5	5	4	5	4	4	6	6	5	5	3	5	4	4		Beer WD	NO	6	6
2	Prematura-Cumbia	21	Male	UK	4	3	2	5	2	5	5	5	5	6	4	5	3	4	2	5	Beer with music	Beer TK	NO	4	3
2	Prematura-Cumbia	31	Male	France	1	1	5	6	3	6	6	2	3	6	4	5	4	5	4	4	Beer with music	Beer WD	NO	5	5
2	Prematura-Cumbia	23	Male	France	2	2	5	5	6	5	5	5	6	6	2	5	5	6	3	4		No preference	YES	6	6
2	Prematura-Cumbia	29	Female	Germany	1	4	2	7	7	5	4	6	3	4	3	6	5	6	4	6		Beer WD	YES	3	5
2	Prematura-Cumbia	25	Female	Belgium	3	4	2	5	4	5	4	6	6	4	5	4	2	5	5	2	Beer with music	Beer WD	NO	2	3
2	Prematura-Cumbia	42	Male	Usa	5	2	3	2	2	2	4	5	4	2	1	3	2	4	5	2	Beer with music	Beer TK	YES	6	5
2	Prematura-Cumbia	25	Male	Germany	6	6	2	5	1	4	4	7	6	2	5	1	1	5	6	1		No preference	NO	3	5
2	Prematura-Cumbia	54	Female	France	2	2	4	5	6	5	2	6	2	4	3	5	5	6	2	4		No preference	NO	5	5
2	Prematura-Cumbia	63	Male	France	5	5	6	3	2	4	4	6	6	6	4	5	3	6	6	4		Beer TK	NO	4	4
2	Prematura-Cumbia	56	Female	Belgium	6	5	4	2	2	4	4	6	4	5	3	5	5	6	5	2	Beer with music	Beer TK	YES	2	1
2	Prematura-Cumbia	26	Female	Belgium	2	2	2	2	1	4	2	5	2	5	1	3	4	6	4	1	No preference	Beer TK	YES	5	7
2	Prematura-Cumbia	28	Male	Belgium	4	5	3	2	3	3	3	6	7	2	5	3	5	4	6	5	Beer with music	Beer WD	YES	4	6
2	Prematura-Cumbia	45	Male	Spain	5	4	4	5	4	5	5	6	3	4	5	3	3	3	4	5	Beer with music	No preference	NO	3	3
2	Prematura-Cumbia	24	Female	Holland	3	5	3	3	5	3	3	4	2	4	2	5	3	5	4	3	Beer with music	Beer TK	NO	2	2
					4.78981	4.1465	3.66242	3.87261	3.57962	4.21656	4.17197	5.31847	4.22293	4.03185	3.18471	4.24841	3.65605	4.49682	4.38854	3.21656

## Sheet: OutPut Exp 3 -Chimayblue N157
Gender
		Frequency	Percent	Valid Percent	Cumulative Percent
Válido	Female	75	47.7707	47.7707	47.7707
	Male	82	52.2293	52.2293	100
	Total	157	100	100
Country
		Frequency	Percent	Valid Percent	Cumulative Percent
Válido	Argentina	2	1.27389	1.27389	1.27389
	Australia	2	1.27389	1.27389	2.54777
	Belgium	23	14.6497	14.6497	17.1975
	Croatia	5	3.18471	3.18471	20.3822
	France	30	19.1083	19.1083	39.4904
	Germany	11	7.00637	7.00637	46.4968
	Holland	1	0.636943	0.636943	47.1338
	Iran	1	0.636943	0.636943	47.7707
	Ireland	2	1.27389	1.27389	49.0446
	Italy	17	10.828	10.828	59.8726
	Malta	3	1.91083	1.91083	61.7834
	Mexico	1	0.636943	0.636943	62.4204
	Netherlands	1	0.636943	0.636943	63.0573
	Portugal	2	1.27389	1.27389	64.3312
	Russia	2	1.27389	1.27389	65.6051
	Scotland	1	0.636943	0.636943	66.242
	Spain	38	24.2038	24.2038	90.4459
	Sweden	1	0.636943	0.636943	91.0828
	Switzerland	4	2.54777	2.54777	93.6306
	UK	7	4.4586	4.4586	98.0892
	Usa	3	1.91083	1.91083	100
	Total	157	100	100
Descriptive Statistics
	N	Minimum	Maximum	Mean	Std. Deviation
Age	157	16	70	35.3758	13.9152
N válid	157
Liking_Beer
Measure: MEASURE_1
Source		Type III Sum of Squares	df	Mean Square	F	Sig.	Partial Eta Squared	Noncent. Parameter	Observed Powera
Liking_Beer	Sphericity Assumed	23.488	1	23.488	12.017	0.001	0.072	12.017	0.931	WITHIN
LikingBeer * Condition	Sphericity Assumed	1.323	1	1.323	0.677	0.412	0.004	0.677	0.129
Error(Liking_beer)	Sphericity Assumed	302.951	155	1.955
a. Computed using alpha = ,05
Tests of Between-Subjects Effects
Measure: MEASURE_1
Transformed Variable: Average
Source	Type III Sum of Squares	Df	Mean Square	F	Sig.	Partial Eta Squared	Noncent. Parameter	Observed Powera
Intercept	6250.71	1	6250.71	2114.84	0	0.932	2114.84	1
Condition	2.862	1	2.862	0.968	0.327	0.006	0.968	0.165
Error	458.125	155	2.956
a. Computed using alpha = ,05
Likin_Beer
Measure: MEASURE_1
Liking Beer	Mean	Std. Error	95% Confidence Interval
			Lower Bound	Upper Bound
POSITIVE	4.77	0.13	4.513	5.028
NEGATIVE	4.219	0.121	3.98	4.459
1. Condition
Measure: MEASURE_1
Condition	Mean	Std. Error	95% Confidence Interval
			Lower Bound	Upper Bound
Chopin-Prematura	4.591	0.13	4.335	4.847
Cumbia-Prematura	4.399	0.146	4.109	4.688
Descriptive Statistics
	Condition	Mean	Std. Deviation	N
Alikingbeer	Chopin-Prematura	4.93	1.567	88
	Cumbia-Prematura	4.61	1.691	69
	Total	4.79	1.625	157
Blikingbeer	Chopin-Prematura	4.25	1.503	88
	Cumbia-Prematura	4.19	1.517	69
	Total	4.22	1.505	157
Measure: MEASURE_1
Source		Type III Sum of Squares	df	Mean Square	F	Sig.	Partial Eta Squared	Noncent. Parameter	Observed Powera
Sweetness	Sphericity Assumed	18.005	1	18.005	13.012	0	0.077	13.012	0.948	WITHIN
Sweetness * Condition	Sphericity Assumed	0.119	1	0.119	0.086	0.769	0.001	0.086	0.06
Error(Sweetness)	Sphericity Assumed	214.467	155	1.384
a. Computed using alpha = ,05
Tests of Between-Subjects Effects
Measure: MEASURE_1
Transformed Variable: Average
Source	Type III Sum of Squares	df	Mean Square	F	Sig.	Partial Eta Squared	Noncent. Parameter	Observed Powera
Intercept	3635.63	1	3635.63	1549.13	0	0.909	1549.13	1
Condition	0.398	1	0.398	0.17	0.681	0.001	0.17	0.069
Error	363.768	155	2.347
a. Computed using alpha = ,05
1. Condition
Measure: MEASURE_1
Condition	Mean	Std. Error	95% Confidence Interval
			Lower Bound	Upper Bound
POSITIVE 1	3.392	0.115	3.164	3.62
POSITIVE 2	3.464	0.13	3.206	3.721
2. Sweetness
Measure: MEASURE_1
Sweetness	Mean	Std. Error	95% Confidence Interval
			Lower Bound	Upper Bound
POSITIVE	3.669	0.113	3.446	3.892
NEGATIVE	3.187	0.107	2.976	3.398
Descriptive Statistics
	Condition	Mean	Std. Deviation	N
ASweetness	Chopin-Prematura	3.61	1.377	88
	Cumbia-Prematura	3.72	1.434	69
	Total	3.66	1.399	157			Media	Desv
BSweetness	Chopin-Prematura	3.17	1.243	88		Positive 1	3.392	1.31
	Cumbia-Prematura	3.2	1.431	69		Positive 2	3.464	1.432
	Total	3.18	1.324	157		Total positive	3.42	1.37
Bitternes
Tests of Within-Subjects Effects
Measure: MEASURE_1
Source		Type III Sum of Squares	df	Mean Square	F	Sig.	Partial Eta Squared	Noncent. Parameter	Observed Powera
Bitterness	Sphericity Assumed	11.021	1	11.021	7.319	0.008	0.045	7.319	0.767
Bitterness * Condition	Sphericity Assumed	0.015	1	0.015	0.01	0.921	0	0.01	0.051
Error(Bitterness)	Sphericity Assumed	233.399	155	1.506
a. Computed using alpha = ,05
Tests of Between-Subjects Effects
Measure: MEASURE_1
Transformed Variable: Average
Source	Type III Sum of Squares	df	Mean Square	F	Sig.	Partial Eta Squared	Noncent. Parameter	Observed Powera
Intercept	5110.47	1	5110.47	2322.46	0	0.937	2322.46	1
Condition	0.28	1	0.28	0.127	0.722	0.001	0.127	0.064
Error	341.071	155	2.2
a. Computed using alpha = ,05
2. Bitterness
Measure: MEASURE_1
Bitterness	Mean	Std. Error	95% Confidence Interval
			Lower Bound	Upper Bound
POSITIVE	3.875	0.111	3.657	4.094
NEGATIVE	4.253	0.108	4.039	4.467
1. Condition
Measure: MEASURE_1
Condition	Mean	Std. Error	95% Confidence Interval
			Lower Bound	Upper Bound
POSITIVE 1	4.034	0.112	3.813	4.255
POSITIVE 2	4.094	0.126	3.845	4.344
Descriptive Statistics
	Condition	Mean	Std. Deviation	N
ABitterness	Chopin-Prematura	3.85	1.309	88
	Cumbia-Prematura	3.9	1.457	69
	Total	3.87	1.372	157			Mean	St Desv
BBitterness	Chopin-Prematura	4.22	1.36	88		Positive 1	4.034	1.33
	Cumbia-Prematura	4.29	1.33	69		Positive 2	4.094	2.12
	Total	4.25	1.343	157		Total positive	4.064	1.72
Sourness
Tests of Within-Subjects Effects
Measure: MEASURE_1
Source		Type III Sum of Squares	df	Mean Square	F	Sig.	Partial Eta Squared	Noncent. Parameter	Observed Powera
Sourness	Sphericity Assumed	0.564	1	0.564	0.347	0.557	0.002	0.347	0.09
Sourness * Condition	Sphericity Assumed	0.424	1	0.424	0.261	0.61	0.002	0.261	0.08
Error(Sourness)	Sphericity Assumed	252.118	155	1.627
a. Computed using alpha = ,05
Tests of Between-Subjects Effects
Measure: MEASURE_1
Transformed Variable: Average
Source	Type III Sum of Squares	df	Mean Square	F	Sig.	Partial Eta Squared	Noncent. Parameter	Observed Powera
Intercept	4080.79	1	4080.79	1447.18	0	0.903	1447.18	1
Condition	4.068	1	4.068	1.443	0.232	0.009	1.443	0.223
Error	437.072	155	2.82
a. Computed using alpha = ,05
2. Sourness
Measure: MEASURE_1
Sourness	Mean	Std. Error	95% Confidence Interval
			Lower Bound	Upper Bound
1	3.589	0.129	3.334	3.844
2	3.674	0.11	3.457	3.892
1. Condition
Measure: MEASURE_1
Condition	Mean	Std. Error	95% Confidence Interval
			Lower Bound	Upper Bound
Chopin-Prematura	3.517	0.127	3.267	3.767
Cumbia-Prematura	3.746	0.143	3.464	4.029
Descriptive Statistics
	Condition	Mean	Std. Deviation	N
ASourness	Chopin-Prematura	3.51	1.59	88
	Cumbia-Prematura	3.67	1.624	69			Media	Desv
	Total	3.58	1.602	157		Positive 1	3.517	1.438
BSourness	Chopin-Prematura	3.52	1.286	88		Positive 2	3.746	1.5445
	Cumbia-Prematura	3.83	1.465	69		Total Positive	3.63	1.49
	Total	3.66	1.371	157
Strenght
Tests of Within-Subjects Effects
Measure: MEASURE_1
Source		Type III Sum of Squares	df	Mean Square	F	Sig.	Partial Eta Squared	Noncent. Parameter	Observed Powera
Strength	Sphericity Assumed	6.748	1	6.748	6.315	0.013	0.039	6.315	0.705	WITHIN
Strength * Condition	Sphericity Assumed	1.207	1	1.207	1.13	0.29	0.007	1.13	0.184
Error(Strength)	Sphericity Assumed	165.627	155	1.069
a. Computed using alpha = ,05
Tests of Between-Subjects Effects
Measure: MEASURE_1
Transformed Variable: Average
Source	Type III Sum of Squares					df		Mean Square					F		Sig.			Partial Eta Squared				Noncent. Parameter	Observed Powera
Intercept	5846.91					1		5846.91					2688.28		0			0.945				2688.28	1
Condition	1.931					1		1.931					0.888		0.347			0.006				0.888	0.155
Error	337.119					155		2.175
a. Computed using alpha = ,05
. Strength
Measure: MEASURE_1
Strength		Mean			Std. Error					95% Confidence Interval
										Lower Bound				Upper Bound
POSITIVE		4.199			0.101					4				4.399
NEGATIVE		4.495			0.104					4.289				4.7
1. Condition
Measure: MEASURE_1
Condition				Mean			Std. Error				95% Confidence Interval
											Lower Bound					Upper Bound
Chopin-Prematura				4.426			0.111				4.207					4.646
Cumbia-Prematura				4.268			0.126				4.02					4.516
Descriptive Statistics
			Condition						Mean			Std. Deviation					N
AStrength			Chopin-Prematura						4.34			1.258					88								Media	Desv
			Cumbia-Prematura						4.06			1.247					69							Positive 1	4.425	1.2585
			Total						4.22			1.257					157							Positive 2	4.27	1.291
BStrength			Chopin-Prematura						4.51			1.259					88
			Cumbia-Prematura						4.48			1.335					69
			Total						4.5			1.289					157
Body
Tests of Within-Subjects Effects
Measure: MEASURE_1
Source		Type III Sum of Squares	df	Mean Square	F	Sig.	Partial Eta Squared	Noncent. Parameter	Observed Powera
Body	Sphericity Assumed	3.424	1	3.424	2.613	0.108	0.017	2.613	0.362
Body * Condition	Sphericity Assumed	0.201	1	0.201	0.153	0.696	0.001	0.153	0.068
Error(Body)	Sphericity Assumed	203.118	155	1.31
a. Computed using alpha = ,05
Tests of Between-Subjects Effects
Measure: MEASURE_1
Transformed Variable: Average
Source	Type III Sum of Squares	Df	Mean Square	F	Sig.	Partial Eta Squared	Noncent. Parameter	Observed Powera
Intercept	5640.11	1	5640.11	3079.1	0	0.952	3079.1	1
Condition	2.418	1	2.418	1.32	0.252	0.008	1.32	0.208
Error	283.92	155	1.832
a. Computed using alpha = ,05
2. Body
Measure: MEASURE_1
Body	Mean	Std. Error	95% Confidence Interval
			Lower Bound	Upper Bound
1	4.164	0.102	3.963	4.366
2	4.375	0.099	4.178	4.571
1. Condition
Measure: MEASURE_1
Condition	Mean	Std. Error	95% Confidence Interval
			Lower Bound	Upper Bound
Chopin-Prematura	4.358	0.102	4.156	4.559
Cumbia-Prematura	4.181	0.115	3.954	4.409
Descriptive Statistics
	Condition	Mean	Std. Deviation	N
ABody	Chopin-Prematura	4.23	1.266	88
	Cumbia-Prematura	4.1	1.274	69
	Total	4.17	1.267	157			Mean	St Desv
BBody	Chopin-Prematura	4.49	1.135	88		Positive 1	4.36	1.2005
	Cumbia-Prematura	4.26	1.357	69		Positive 2	4.18	1.3155
	Total	4.39	1.239	157		Total Positive	4.27	1.258
LIKING SONG
Tests of Within-Subjects Effects
Measure: MEASURE_1
Source		Type III Sum of Squares	df	Mean Square	F	Sig.	Partial Eta Squared	Noncent. Parameter	Observed Powera
Liking_Song	Sphericity Assumed	327.624	1	327.624	139.884	0	0.474	139.884	1	WITHIN
LikingSong * Condition	Sphericity Assumed	10.159	1	10.159	4.337	0.039	0.027	4.337	0.544
Error(LikingSong)	Sphericity Assumed	363.026	155	2.342
a. Computed using alpha = ,05
Tests of Between-Subjects Effects
Measure: MEASURE_1
Transformed Variable: Average
Source	Type III Sum of Squares	df	Mean Square	F	Sig.	Partial Eta Squared	Noncent. Parameter	Observed Powera
Intercept	5556.66	1	5556.66	2191.89	0	0.934	2191.89	1
Condition	18.587	1	18.587	7.332	0.008	0.045	7.332	0.768	BETWEEN
Error	392.942	155	2.535
a. Computed using alpha = ,05
1. Liking Song
Measure: MEASURE_1
Liking Song	Mean	Std. Error		95% Confidence Interval
				Lower Bound			Upper Bound
POSITIVE	5.267	0.116		5.039			5.495
NEGATIVE	3.209	0.135		2.942			3.475
2. Condition
Measure: MEASURE_1
Condition			Mean		Std. Error	95% Confidence Interval
						Lower Bound		Upper Bound
POSITIVE 1			4.483		0.12	4.246		4.72
POSITIVE 2			3.993		0.136	3.725		4.26
Descriptive Statistics
	Condition	Mean	Std. Deviation	N			Mean	St Desv
ALiking_Song	Chopin-Prematura	5.69	1.299	88		Positive 1	4.483	1.53
	Cumbia-Prematura	4.84	1.596	69		Positive 2	3.993	1.162
	Total	5.32	1.494	157		Total positive	4.23	1.34
BLiking_Song	Chopin-Prematura	3.27	1.7	88
	Cumbia-Prematura	3.14	1.647	69
	Total	3.22	1.673	157
Match Beer - Song
Tests of Within-Subjects Effects
Measure: MEASURE_1
Source		Type III Sum of Squares	df	Mean Square	F	Sig.	Partial Eta Squared	Noncent. Parameter	Observed Powera
Match_Song_Beer	Sphericity Assumed	0.834	1	0.834	0.249	0.618	0.002	0.249	0.079
Match_Song_Beer * Condition	Sphericity Assumed	0.617	1	0.617	0.185	0.668	0.001	0.185	0.071
Error(Match_Song_Beer)	Sphericity Assumed	518.351	155	3.344
a. Computed using alpha = ,05
Tests of Between-Subjects Effects
Measure: MEASURE_1
Transformed Variable: Average
Source	Type III Sum of Squares	df	Mean Square	F	Sig.	Partial Eta Squared	Noncent. Parameter	Observed Powera
Intercept	5174.97	1	5174.97	1921.26	0	0.925	1921.26	1
Condition	0.006	1	0.006	0.002	0.962	0	0.002	0.05
Error	417.497	155	2.694
a. Computed using alpha = ,05
2. Match_Song_Beer
Measure: MEASURE_1
Match_Song_Beer	Mean	Std. Error	95% Confidence Interval
			Lower Bound	Upper Bound
1	4.142	0.139	3.867	4.416
2	4.038	0.14	3.761	4.315
1. Condition
Measure: MEASURE_1
Condition	Mean	Std. Error	95% Confidence Interval
			Lower Bound	Upper Bound
Chopin-Prematura	4.085	0.124	3.841	4.33
Cumbia-Prematura	4.094	0.14	3.818	4.37
Descriptive Statistics
	Condition	Mean	Std. Deviation	N
AMatch_Song_Beer	Chopin-Prematura	4.18	1.778	88
	Cumbia-Prematura	4.1	1.664	69
	Total	4.15	1.724	157
BMatch_Song_Beer	Chopin-Prematura	3.99	1.81	88
	Cumbia-Prematura	4.09	1.66	69
	Total	4.03	1.741	157
Willingness to pay
Group Statistics
	Condition	N	Mean	Std. Deviation	Std. Error Mean
Willingness_to_Pay_TKBeer	Chopin-Prematura	88	4.32	1.528	0.163
	Cumbia-Prematura	69	4.25	1.408	0.17
Willingness_to_Pay_WDBeer	Chopin-Prematura	88	4.07	1.453	0.155
	Cumbia-Prematura	69	3.91	1.625	0.196
WILLINGNESS TO PAY
Paired Samples Statistics
		Mean	N	Std. Deviation	Std. Error Mean
Pair 1	Willingness_to_Pay_TKBeer	4.29	157	1.472	0.117
	Willingness_to_Pay_WDBeer	4	157	1.528	0.122
Paired Samples Test
		Paired Differences					t	df	Sig. (2-tailed)
		Mean	Std. Deviation	Std. Error Mean	95% Confidence Interval of the Difference
					Lower	Upper
Pair 1	Willingness_to_Pay_TKBeer - Willingness_to_Pay_WDBeer	0.287	1.653	0.132	0.026	0.547	2.173	156	0.031
Crosstab
			Condition		Total
			Chopin-Prematura	Cumbia-Prematura
Beer_Preference	Beer TK	Count	43	32	75
		% within Condition	0.489	0.464	0.478
	Beer WD	Count	33	20	53
		% within Condition	0.375	0.29	0.338
	No preference	Count	12	17	29
		% within Condition	0.136	0.246	0.185
Total		Count	88	69	157
		% within Condition	1	1	1
Chi-Square Tests
	Value	df	Asymp. Sig. (2-sided)
Pearson Chi-Square	3,415a	2	0.181
Likelihood Ratio	3.402	2	0.183
N of Valid Cases	157
a. 0 cells (0,0%) have expected count less than 5. The minimum expected count is 12,75.
Symmetric Measures
		Value	Approx. Sig.
Nominal by Nominal	Contingency Coefficient	0.146	0.181
N of Valid Cases		157
a. Not assuming the null hypothesis.
b. Using the asymptotic standard error assuming the null hypothesis.
Crosstab
			Condition		Total
			Chopin-Prematura	Cumbia-Prematura
PayMore_withsong	NO	Count	35	29	64
		% within Condition	0.398	0.42	0.408
	YES	Count	53	40	93
		% within Condition	0.602	0.58	0.592
Total		Count	88	69	157
		% within Condition	1	1	1
Chi-Square Tests
	Value	df	Asymp. Sig. (2-sided)	Exact Sig. (2-sided)	Exact Sig. (1-sided)
Pearson Chi-Square	,082a	1	0.775
Continuity Correctionb	0.015	1	0.903
Likelihood Ratio	0.081	1	0.775
Fisher's Exact Test				0.87	0.451
N of Valid Cases	157
a. 0 cells (0,0%) have expected count less than 5. The minimum expected count is 28,13.
b. Computed only for a 2x2 table
Symmetric Measures
		Value	Approx. Sig.
Nominal by Nominal	Contingency Coefficient	0.023	0.775
N of Valid Cases		157
a. Not assuming the null hypothesis.
b. Using the asymptotic standard error assuming the null hypothesis.
